# Supplementary material for: Mendelian Randomization and Drug Repurposing Analysis Identifies APOE as a Potential Therapeutic Target for Low Back Pain
Source: Research Square preprint supplement (doi:10.21203/rs.3.rs-7587626/v1), 2025-09-17
Supplement: Supplementary file 1 [file 166dbcb120978c279d368aa6.xlsx]

## Sheet: S1
Plasma protein instrumental variables used for Mendelian randomization analysis after screening
SNP	beta.exposure	se.exposure	other_allele.exposure	effect_allele.exposure	eaf.exposure	chr.exposure	pos.exposure	pval.exposure	F_stat	protein_name
rs36520	-0.122388	0.0215707	A	G	0.181201	19	51442795	1.45083e-08	32.1920918415218	SIGLEC12
rs8113048	1.08903	0.0192155	T	T	0.153196	19	51503888	1e-200	3212.00570589052	SIGLEC12
rs138536366	0.161595	0.0259376	C	T	0.114793	19	51619189	4.92188e-10	38.8147024205302	SIGLEC12
rs115294736	0.152858	0.0243415	C	T	0.130875	19	51683077	3.58898e-10	39.4349842121644	SIGLEC12
rs62045706	0.280027	0.0202477	G	A	0.204353	16	81851810	5.91315e-43	191.270688204321	PLCG2
rs55880431	0.119169	0.0167451	C	G	0.447317	16	81943852	1.21253e-12	50.6466936947842	PLCG2
rs75468761	-0.331618	0.0403574	T	G	0.0432552	1	180281203	2.45205e-16	67.5195956535792	ACBD6
rs111963801	-0.554848	0.0680866	C	A	0.0148343	12	123557234	4.28599e-16	66.4086657367314	EIF2B1
rs474632	-0.101389	0.0176556	C	T	0.335159	16	88788099	9.70147e-09	32.9774231710889	APRT
rs535070	-0.110548	0.0175576	A	G	0.34015	16	88812323	3.22633e-10	39.6434533050559	APRT
rs7138740	0.182513	0.0183448	T	A	0.284972	12	6874600	3.58907e-23	98.9832353143039	ENO2
rs4796791	-0.428859	0.0167608	T	T	0.34625	17	42378745	2.71895e-138	654.695822032054	STAT3
rs11874858	0.135265	0.0167105	A	A	0.46534	18	47931447	6.69185e-16	65.5227300358401	SMAD2
rs35597368	-0.282808	0.0263715	T	C	0.109871	4	54273604	1.24608e-26	115.004203652278	PDGFRA
rs703817	-0.105123	0.0166196	C	C	0.489602	12	57096045	2.67944e-10	40.008692491228	STAT6
rs10889333	-0.33608	0.0170489	G	A	0.331623	1	62491359	2.70082e-84	388.590885781618	ANGPTL3
rs72700845	-1.31999	0.072826	C	T	0.0128241	1	150596273	7.78804e-72	328.524958099819	MCL1
rs2085767	0.178269	0.0255653	A	A	0.116248	8	27863097	3.37537e-12	48.6239089891111	SCARA5
rs2685422	-0.253335	0.0181218	G	A	0.291557	8	27947867	7.7278e-44	195.428421161604	SCARA5
rs71483302	-0.110541	0.0181736	C	T	0.295716	9	137069998	1.24356e-09	36.996858461468	NPDC1
rs7106958	0.110371	0.0173317	G	A	0.352697	11	123141950	2.03036e-10	40.5534333672175	CLMP
rs2302605	-0.436321	0.01583	C	C	0.442812	11	123194975	4.34505e-159	759.714476742585	CLMP
rs4252551	0.502576	0.0158304	G	A	0.426591	19	55367688	1e-200	1007.90526436912	TMEM190
rs10407001	0.470373	0.0278083	C	G	0.0911549	19	55369793	5.66032e-63	286.111878925607	TMEM190
rs3134900	0.179082	0.0260596	C	G	0.116664	6	31506180	6.85951e-12	47.224610152138	APOM
rs805264	-0.952002	0.0515552	G	A	0.026272	6	31656096	1.98826e-74	340.981462838996	APOM
rs28450126	-0.385366	0.0251079	G	A	0.121309	19	48904758	2.4256e-52	235.573269641114	NUCB1
rs9880064	0.418723	0.016427	A	A	0.385692	3	128636666	2.65423e-137	649.736282790047	RPN1
rs1555015	0.147726	0.0200118	A	A	0.218841	22	36883930	1.7345e-13	54.4931068548608	CSF2RB
rs1534881	-0.695712	0.0144645	G	A	0.455982	22	36933406	1e-200	2313.40748861709	CSF2RB
rs11145948	-0.262711	0.0162539	G	G	0.483571	9	136963460	9.44958e-58	261.241006390397	PTGDS
rs2765021	-0.252527	0.033597	C	C	0.0637737	1	1362042	6.31177e-14	56.4956019113918	MXRA8
rs4884685	-0.126729	0.0172446	A	C	0.376126	13	66678757	2.21803e-13	54.0064667790208	PCDH9
rs956277	0.135007	0.0203332	C	T	0.214543	13	66805577	3.37118e-11	44.0860418792771	PCDH9
rs55991125	-0.38828	0.0366033	C	T	0.0534452	1	153307220	4.26638e-26	112.525139300928	PGLYRP3
rs62282372	-0.570619	0.0242687	C	G	0.124151	3	165194166	7.53529e-118	552.839964514955	SLITRK3
rs78729408	0.416428	0.0720578	T	A	0.0136559	3	165436289	7.82406e-09	33.3977991984968	SLITRK3
rs76237622	-0.401352	0.0558659	G	A	0.022806	4	70127829	7.43725e-13	51.6127813926823	HTN3
rs6036977	0.220866	0.0247425	C	C	0.128726	20	24921032	5.49743e-19	79.6838985754545	APMAP
rs78661674	-0.336762	0.0567146	G	A	0.0218356	20	24971511	3.02208e-09	35.2578977018422	APMAP
rs573088123	-0.488712	0.0556898	C	T	0.0221129	10	45821399	2.09601e-18	77.0113416575198	MSMB
rs6602880	-0.412648	0.0168838	T	C	0.339872	10	46175087	8.19761e-127	597.336552437407	MSMB
rs11259826	0.426819	0.0447819	C	T	0.0356994	10	46228813	2.08024e-21	90.8411150187516	MSMB
rs187916528	-0.403299	0.0456826	G	A	0.0338971	10	46284579	1.31704e-18	77.9386112713624	MSMB
rs61349706	0.409769	0.0365023	A	C	0.0538611	11	130094940	5.29322e-29	126.019496356479	APLP2
rs10437608	-0.297298	0.0162591	G	G	0.459448	11	20364060	4.78022e-73	334.342026840989	HTATIP2
rs6600137	0.685275	0.025686	A	A	0.106474	16	1357440	1.25228e-149	711.765314295698	GNPTG
rs3829564	-0.266474	0.0338398	G	A	0.0632885	16	1437018	3.9208e-15	62.0089113787313	GNPTG
rs1130866	0.516735	0.0154599	G	G	0.481492	2	85666618	1e-200	1117.17805549344	SFTPB
rs4832182	-0.109421	0.0168008	C	C	0.423125	2	85689161	7.8691e-11	42.4171451282312	SFTPB
rs6138990	-0.161103	0.0230146	C	T	0.156384	20	3041972	2.78905e-12	49.0004866488146	GNRH2
rs139119668	0.366776	0.064051	T	C	0.0171219	17	63295385	1.06768e-08	32.7906473490312	ACE
rs4324	-0.733846	0.0141312	A	G	0.463746	17	63485810	1e-200	2696.81885931027	ACE
rs3815358	-0.132442	0.0174735	A	A	0.351518	17	63932910	3.90005e-14	57.4502141820111	ACE
rs75328154	-0.197586	0.0191483	C	T	0.244836	9	90790154	8.62183e-25	106.476040448235	SYK
rs316343	-0.302428	0.0162916	C	C	0.454873	6	2839825	3.51492e-75	344.600987629971	SERPINB1
rs11927001	0.783458	0.0245936	A	G	0.112367	3	71746073	1e-200	1014.81581962196	PROK2
rs2322154	0.117697	0.0168227	A	T	0.444822	3	71804036	2.86346e-12	48.9484998106292	PROK2
rs115293707	0.542015	0.0310012	G	C	0.073825	19	7729723	4.54713e-67	305.678998197041	CLEC4G
rs688727	-0.104411	0.0186216	A	A	0.269721	11	75544665	2.13527e-08	31.438261594428	SERPINH1
rs584961	0.213548	0.0269593	A	A	0.105573	11	75566583	2.70718e-15	62.7442299552898	SERPINH1
rs599816	-0.211427	0.0165167	G	G	0.462152	11	75582937	4.10398e-37	163.860521933156	SERPINH1
rs12878	-0.322072	0.016668	G	G	0.395467	7	100149507	3.78818e-81	373.369601936525	PILRA
rs35305377	0.76748	0.0141316	G	G	0.445168	7	100341332	1e-200	2949.52078950043	PILRA
rs2553022	0.190456	0.0192348	A	G	0.235824	7	100804240	5.73363e-23	98.0424076944237	PILRA
rs11040883	-0.299479	0.0228978	G	A	0.152017	11	6388560	1.19359e-38	171.058725978348	SMPD1
rs1050239	-0.605083	0.0184173	G	A	0.231318	11	6394233	1e-200	1079.38897578311	SMPD1
rs117849041	-0.166257	0.027002	C	T	0.106336	19	2312904	7.80102e-10	37.9112420894504	LINGO3
rs111840334	0.160499	0.0227849	C	T	0.160128	18	31650887	2.03954e-12	49.6192742666943	B4GALT6
rs141957788	-1.33	0.0409177	A	T	0.0373631	18	31668913	1e-200	1056.52761815343	B4GALT6
rs144333451	0.462427	0.0520751	T	G	0.0259254	18	31885600	8.32607e-19	78.8544381971468	B4GALT6
rs11727676	0.299585	0.0287735	T	C	0.0907389	4	144737912	3.301e-25	108.406355562509	HHIP
rs515373	0.136359	0.0168132	G	A	0.483363	18	45826966	5.89139e-16	65.7759087625825	SIGLEC15
rs4807558	-0.672107	0.0149489	G	A	0.41141	19	4257186	1e-200	2021.42840363426	EBI3
rs4807575	0.240912	0.0165551	T	C	0.429364	19	4287128	2.63847e-47	211.764544913527	EBI3
rs1697890	0.114405	0.0167181	T	T	0.478164	5	38864561	8.38067e-12	46.8291390712168	OSMR
rs357277	-0.204229	0.0169662	G	G	0.392416	5	38931817	4.68258e-33	144.899089745396	OSMR
rs35082231	0.329143	0.0191529	C	T	0.238805	17	9437887	6.65652e-65	295.324967028827	STX8
rs12800878	-0.302827	0.0168116	G	G	0.385138	11	131246794	5.45401e-71	324.467417262302	NTM
rs2511775	0.526514	0.0161829	G	C	0.363094	11	131333920	1e-200	1058.53968906317	NTM
rs67335822	0.145814	0.0228428	G	T	0.157216	2	154010909	1.83969e-10	40.7473878335988	GALNT13
rs1995950	0.616429	0.0193244	A	G	0.204561	2	159944117	1e-200	1017.54608346938	PLA2R1
rs67650243	0.442821	0.0239371	T	G	0.134063	2	160026151	1.09489e-74	342.226273643984	PLA2R1
rs10165387	0.171582	0.0206904	A	T	0.199224	2	160413035	1.3077e-16	68.7710535919141	PLA2R1
rs35638197	-0.221329	0.0364152	T	C	0.0558713	17	49207373	1.27953e-09	36.9412208887164	GNGT2
rs17176322	0.254739	0.0167682	G	G	0.390129	17	4153082	2.48531e-51	230.790532186127	CYB5D2
rs140231030	-0.820399	0.0567535	G	T	0.0215583	17	4280059	1.03689e-46	208.960859148032	CYB5D2
rs60612523	0.704774	0.0646769	A	G	0.0165673	1	116517087	1.95112e-27	118.741178933591	CD58
rs11640587	0.187831	0.0169797	C	C	0.377651	16	4214222	3.22775e-28	122.369874813823	SRL
rs4803321	-0.55044	0.0438729	A	A	0.0366699	19	40237362	9.82579e-36	157.408176516779	PLD3
rs9784645	0.293556	0.0184713	G	T	0.265285	5	148337418	6.30026e-56	252.573044294655	SPINK7
rs10796041	0.169732	0.0168232	C	T	0.435672	10	13222896	8.86873e-24	101.791201666597	UCMA
rs1537771	-0.440307	0.0230104	C	T	0.147581	10	13241177	1.18332e-79	366.153207847325	UCMA
rs2186924	0.132496	0.0171726	G	C	0.383405	21	43708287	1.36658e-14	59.5296633416348	PDXK
rs148593140	-0.748543	0.0733369	G	C	0.0128934	21	43863088	2.69985e-24	104.18097334072	PDXK
rs2298069	-0.259668	0.0237392	C	T	0.140094	1	119811396	1.24421e-27	119.647797164723	REG4
rs2009836	-0.605707	0.0163549	T	T	0.331901	7	76301843	1e-200	1371.60607309765	HSPB1
rs56344644	-0.18849	0.0203629	T	A	0.206364	7	76792774	2.73451e-20	85.6835342571631	HSPB1
rs6677137	0.502006	0.0157083	T	C	0.415777	1	203154130	1e-200	1021.31436864334	CHI3L1
rs946260	0.396274	0.0344074	G	G	0.0603078	1	203183192	1.99462e-30	132.643949537612	CHI3L1
rs142266291	0.565365	0.0777424	G	A	0.011507	1	203299222	3.90674e-13	52.8861498160108	CHI3L1
rs76858806	0.251676	0.0395736	C	T	0.0453348	1	203334814	2.14504e-10	40.4457121196263	CHI3L1
rs10116674	0.571835	0.0444517	G	A	0.0355608	9	110369372	1.84456e-37	165.487318012995	SVEP1
rs138764012	-0.5006	0.075628	G	A	0.0122002	9	110393715	3.86937e-11	43.8143587071541	SVEP1
rs61751937	1.03657	0.0471196	G	C	0.0300846	9	110549951	7.262e-104	483.942853493831	SVEP1
rs191541154	-0.352123	0.0498988	C	T	0.0284209	9	110552023	1.86316e-12	49.7976196160725	SVEP1
rs112815427	0.224962	0.0400419	T	C	0.0453348	17	50516409	2.00198e-08	31.563777654761	SPATA20
rs8076632	-0.676147	0.0152265	C	G	0.369749	17	50548567	1e-200	1971.88724241989	SPATA20
rs142230609	-0.41033	0.0500057	G	A	0.0282129	17	50778190	2.69354e-16	67.3329307767241	SPATA20
rs3757067	-0.123684	0.0216502	G	A	0.177804	6	152984732	1.15529e-08	32.6364730151384	MTRF1L
rs10913568	0.435634	0.0158255	C	C	0.478442	1	178544276	1.05532e-158	757.754728671783	ANGPTL1
rs871632	0.227769	0.0180073	T	C	0.2831	1	178934631	2.7582e-36	159.989702288233	ANGPTL1
rs2753408	-0.545943	0.0154196	G	A	0.469638	11	33378145	1e-200	1253.56941681662	KIAA1549L
rs77101501	0.202352	0.0262735	C	T	0.111049	11	33631478	1.5217e-14	59.3169949078958	KIAA1549L
rs2569459	-0.393619	0.0168497	C	T	0.352697	19	51036176	2.07813e-116	545.717350031414	KLK13
rs636676	-0.134218	0.0186345	G	C	0.277138	12	52513634	6.50119e-13	51.8783359908658	KRT5
rs1327532	0.141675	0.0176516	A	A	0.329336	9	110364034	1.16518e-15	64.4196391556508	SVEP1
rs1889322	0.21795	0.0165034	C	T	0.451199	9	110447224	2.30427e-39	174.408197921155	SVEP1
rs61751937	1.10566	0.0469013	G	C	0.0300846	9	110549951	1.95929e-118	555.742275879667	SVEP1
rs2922162	0.790066	0.0139253	T	T	0.45626	12	9966674	1e-200	3218.97515623315	CLEC12A
rs11053548	-0.44362	0.0186665	A	G	0.24435	12	10018128	2.89715e-120	564.80228583763	CLEC12A
rs9425884	-0.0943742	0.0165451	T	C	0.463746	1	31571326	1.21625e-08	32.5362707613071	TINAGL1
rs1050785	-0.220663	0.0167889	C	C	0.401705	2	237324109	5.2035e-39	172.748606167803	COL6A3
rs10929229	0.119244	0.0189678	A	G	0.247886	2	237376075	3.43353e-10	39.5220213387743	COL6A3
rs12922333	-0.151533	0.018909	G	A	0.270692	16	4968368	1.28781e-15	64.2210377370673	NAGPA
rs12599777	-0.574707	0.0201233	A	G	0.190628	16	5029465	4.7505e-170	815.632589858188	NAGPA
rs3856245	0.403095	0.0168155	G	G	0.346943	1	235408113	3.01176e-122	574.639203764918	TBCE
rs10926189	-0.111637	0.0179525	C	T	0.305351	1	235597517	5.30032e-10	38.6693118662233	TBCE
rs73719371	-0.320533	0.0287804	A	G	0.0901844	6	7897914	1.41265e-28	124.037168982899	TXNDC5
rs149742777	0.927539	0.0734425	T	A	0.0127547	6	7909587	3.50303e-36	159.503219978777	TXNDC5
rs72829254	-0.262324	0.0430684	C	T	0.0376404	6	7915821	1.18064e-09	37.0986901420555	TXNDC5
rs7919192	-0.554523	0.0164932	T	C	0.327811	10	91900970	1e-200	1130.39252651092	FGFBP3
rs77381448	-0.433374	0.0574145	C	T	0.0213503	10	92130579	4.95668e-14	56.9747634746616	FGFBP3
rs76029572	0.461667	0.0440668	C	G	0.0372245	7	73578528	1.68683e-25	109.757608470339	TBL2
rs7385804	-0.225072	0.0170842	C	C	0.368779	7	100638347	3.48937e-39	173.561600501107	PCOLCE
rs34942108	-0.197902	0.0272033	G	T	0.105989	7	65854580	3.83149e-13	52.9245512708254	ASL
rs28412533	0.21655	0.0221654	C	G	0.161237	7	66531410	2.09005e-22	95.4476477727221	ASL
rs1935451	0.270185	0.0297457	G	G	0.085332	10	125816857	1.34066e-19	82.5038246485877	UROS
rs35216955	-0.738647	0.0174205	A	G	0.237072	4	17525490	1e-200	1797.84664838482	QDPR
rs17564585	0.343294	0.0525287	G	A	0.0255788	4	17561747	6.77823e-11	42.7109390804563	QDPR
rs73191242	-0.355148	0.0209511	G	A	0.191321	12	108620180	3.1227e-63	287.345954468862	SELPLG
rs7298509	-0.130684	0.0167784	T	A	0.446693	12	108638368	7.71244e-15	60.6657750306912	SELPLG
rs5751777	0.146477	0.0169234	C	C	0.4094	22	23924860	5.99714e-18	74.9141116901056	GSTT2B
rs72881217	0.283933	0.026752	C	T	0.107722	6	33151528	4.01541e-26	112.64689642134	COL11A2
rs3129205	0.381714	0.0167691	G	T	0.348329	6	33158082	7.98992e-111	518.151390872769	COL11A2
rs535584	-0.696934	0.0843157	T	C	0.0097047	6	33590736	1.63771e-16	68.3229176971306	COL11A2
rs6566789	-0.147174	0.0186349	A	A	0.280882	18	74266264	3.26078e-15	62.3746402909799	CYB5A
rs12257472	0.155142	0.0179904	C	T	0.304728	10	103173692	7.88715e-18	74.3664640752193	NT5C2
rs79780963	-0.229234	0.0299464	C	T	0.0849854	10	103192742	2.1884e-14	58.5961150195648	NT5C2
rs2235256	-0.218953	0.0166152	A	G	0.418342	1	175599911	3.33005e-39	173.656343990445	TNR
rs4845586	0.288777	0.0163483	T	G	0.474213	1	153970121	2.1575e-68	312.018254812267	CREB3L4
rs72816586	-0.714534	0.041627	C	T	0.0402745	10	70826163	9.25055e-65	294.642622719727	PCBD1
rs13413887	-0.308586	0.0194601	A	A	0.232636	2	68769536	1.08298e-55	251.456173641184	ARHGAP25
rs2311420	-0.143984	0.0165865	A	A	0.437613	2	68817396	4.80518e-18	75.3561952716438	ARHGAP25
rs10902210	0.159003	0.0281311	G	A	0.0962845	11	733639	1.64432e-08	31.9475242047082	TALDO1
rs1662161	0.104714	0.0165221	A	A	0.459795	11	4115744	2.47093e-10	40.1678888384629	RRM1
rs131805	-0.362562	0.019519	T	T	0.221475	22	50525724	2.87306e-75	345.024106318253	TYMP
rs62325239	-0.980676	0.0421683	A	G	0.0381949	4	99066341	2.00325e-115	540.852582908722	ADH5
rs7375649	0.221387	0.0183132	G	G	0.281159	4	99094995	2.5352e-33	146.142237950306	ADH5
rs17529509	-0.447271	0.0272598	C	A	0.100305	4	99430279	1.99105e-59	269.21307618118	ADH7
rs10993706	-0.371118	0.0312663	A	G	0.0747262	9	90840685	3.39173e-32	140.887043907319	SYK
rs10229520	-0.241779	0.0174539	T	G	0.332663	7	43790865	4.36751e-43	191.889931228199	BLVRA
rs11555256	-0.346591	0.0547799	T	A	0.0233606	6	31797718	2.64962e-10	40.0305992984669	ATF6B
rs6449	0.27216	0.0179812	C	T	0.288576	6	32038878	5.67394e-51	229.092699285039	ATF6B
rs28732177	-0.20745	0.0317785	C	T	0.074241	6	32133100	7.11675e-11	42.6147642794994	ATF6B
rs6032226	-0.101732	0.016718	C	T	0.489949	20	45485639	1.22336e-09	37.0293870664929	WFDC2
rs11555096	-1.65648	0.0542398	C	T	0.0213503	15	80180184	9.53645e-193	932.687667626813	FAH
rs1437222	-0.156264	0.0237401	T	A	0.143006	15	80193822	4.95785e-11	43.3264180789884	FAH
rs1328599	0.451264	0.0300558	G	G	0.0817968	10	95294018	3.38156e-50	225.426409090755	PDLIM1
rs74626198	-0.390423	0.0505161	T	C	0.0273118	12	21543317	1.23399e-14	59.7325643849723	RECQL
rs12717412	-0.302739	0.0168641	G	A	0.37474	14	50935708	1.56968e-70	322.262970902324	PYGL
rs60521621	0.161404	0.0241468	T	C	0.13441	17	75765315	2.49406e-11	44.6796144519295	GALK1
rs6700673	0.136276	0.0167032	C	T	0.475669	1	112614432	3.96401e-16	66.5639970396252	CAPZA1
rs9924894	0.133523	0.0190733	T	G	0.24747	16	69333482	2.78066e-12	49.0072669720812	VPS4A
rs887241	-0.216368	0.0171714	A	A	0.340496	17	19742625	5.01911e-36	158.772269009523	ALDH3A1
rs9902118	-0.3846	0.0171764	C	C	0.325731	17	58093234	2.05477e-107	501.365295975763	DYNLL2
rs117940828	-0.433695	0.0690155	G	C	0.014765	17	58166282	3.49126e-10	39.4889470027603	DYNLL2
rs9610469	-0.425378	0.0173578	G	G	0.315749	22	36257706	1.83668e-127	600.565928365479	APOL1
rs3886200	0.10435	0.0167606	C	T	0.456814	22	36267581	5.05533e-10	38.7619648776211	APOL1
rs831630	-0.394336	0.0172189	C	T	0.309025	11	33721473	4.16957e-112	524.471684151237	CD59
rs10836121	0.113532	0.0166781	C	C	0.469707	11	33848167	1.07509e-11	46.3386556440703	CD59
rs2241883	-0.282662	0.0171942	T	C	0.337793	2	88124547	1.20407e-59	270.253238503337	FABP1
rs72995454	0.448389	0.0510729	C	T	0.0275198	11	119060830	2.0275e-18	77.0777205627952	HMBS
rs10762476	0.584715	0.0228588	C	A	0.143144	10	71771220	3.24965e-138	654.307072426898	C10orf54
rs4747217	0.106998	0.0164503	A	A	0.487037	10	71905893	8.32693e-11	42.3061665665632	C10orf54
rs13034709	0.278776	0.0218313	C	G	0.172258	2	23934696	6.07986e-37	163.06155119213	FKBP1B
rs144689489	-0.62404	0.0190315	G	A	0.206086	2	24100662	1e-200	1075.17415869939	FKBP1B
rs9972730	-0.124283	0.0166605	G	G	0.43484	16	87384100	9.68377e-14	55.6477224168152	MAP1LC3B
rs3822103	-0.343316	0.0161009	G	T	0.470609	4	99833508	6.97983e-98	454.661083328304	DAPP1
rs2789422	-0.252272	0.0164524	G	A	0.423957	1	159922298	3.03023e-52	235.114590521789	TAGLN2
rs2020157	-0.174481	0.0170351	G	T	0.367184	18	26924940	1.88071e-24	104.907589606795	CHST9
rs11660451	0.304102	0.0175253	T	C	0.321919	18	27118770	4.12418e-66	301.097833608579	CHST9
rs2462507	-0.750098	0.015846	A	T	0.302717	6	70635945	1e-200	2240.76706113138	SMAP1
rs13212771	-0.185406	0.0228566	T	G	0.156315	6	70820998	5.81981e-16	65.7997604891643	SMAP1
rs4267918	0.284759	0.043179	G	A	0.0381949	6	71130403	4.55779e-11	43.4920379236432	SMAP1
rs34612764	0.161853	0.0173698	G	A	0.346319	14	99946845	1.54481e-20	86.8264153431934	EVL
rs1190972	-0.225969	0.026725	T	T	0.106336	14	100078063	3.33485e-17	71.4927988771055	EVL
rs12284	-0.246025	0.0238108	A	G	0.136767	5	157787179	7.48457e-25	106.760477272618	CLINT1
rs11679534	0.413824	0.0172538	C	C	0.296964	2	227575661	2.26466e-122	575.256890538764	AGFG1
rs7222782	-0.209533	0.0294109	T	T	0.0860252	17	75275977	1.14691e-12	50.7560986856152	GGA3
rs67794440	-0.551562	0.0165026	A	C	0.322404	1	156708499	1e-200	1117.07910708965	CRABP2
rs12145540	0.194044	0.0308874	G	A	0.0774296	1	156848152	3.52995e-10	39.4673286723615	CRABP2
rs12340697	-0.20562	0.0229118	C	T	0.151809	9	135513873	3.58083e-19	80.5401233411543	LCN1
rs11039024	-0.138597	0.0240227	C	T	0.138431	11	46901617	8.28483e-09	33.2861851209269	ARHGAP1
rs58056804	-0.309332	0.0369879	G	A	0.0521281	1	153552230	7.26727e-17	69.940760365818	S100A2
rs4938644	-0.709014	0.0315185	G	A	0.0713295	11	119282649	2.31465e-108	506.032650996814	CBL
rs4732044	0.112028	0.016776	G	A	0.486621	7	134656210	2.6048e-11	44.5939898358329	BPGM
rs11686263	0.185536	0.0170896	G	A	0.386524	2	88811341	3.01023e-27	117.867095913852	RPIA
rs2688030	-0.648341	0.0158074	A	A	0.349854	17	18359730	1e-200	1682.23276258905	SHMT1
rs2006889	-0.104831	0.0164378	A	A	0.496187	5	38264633	1.91172e-10	40.6716763699118	EGFLAM
rs2434498	-0.198109	0.0195248	G	T	0.231249	5	38351387	4.97792e-24	102.952103318891	EGFLAM
rs2070203	0.108285	0.0165976	G	A	0.490018	16	70269677	7.30214e-11	42.5643508030967	AARS
rs7810512	0.107052	0.0187901	A	C	0.265424	7	45110732	1.2656e-08	32.4587198862928	CCM2
rs1808661	0.113394	0.0170513	G	G	0.382989	19	38933313	3.1417e-11	44.2247269256907	SARS2
rs76354035	0.28658	0.0206045	G	C	0.203521	7	88224953	2.03497e-43	193.44949322887	SRI
rs2066818	-0.602174	0.0322579	C	A	0.0680715	12	56360038	5.50813e-76	348.475153188735	APOF
rs12200756	0.150471	0.023565	G	A	0.144461	6	33056481	1.81621e-10	40.7728177773384	TAPBP
rs469064	0.451191	0.0156654	C	C	0.473589	6	33282699	9.17718e-173	829.541044097501	TAPBP
rs16993864	-1.4996	0.0580213	C	A	0.0188548	21	36074301	6.08019e-141	667.999216549104	CBR1
rs2678208	-0.412362	0.0278018	T	G	0.0962152	1	201853976	4.76944e-49	219.99430839609	RNPEP
rs10920287	0.529875	0.0169607	G	T	0.310828	1	201973882	1e-200	976.02134217026	RNPEP
rs4877	-0.449204	0.0281706	G	T	0.0924026	5	132271895	2.76838e-56	254.269948812371	PDLIM4
rs57808485	-0.153855	0.0239382	C	T	0.14259	1	173356642	1.3827e-10	41.3085781664913	DARS2
rs12564699	-0.301577	0.0182009	G	A	0.284625	1	173708900	1.51354e-60	274.543209368075	DARS2
rs291413	-0.602774	0.0177801	A	G	0.25156	2	190258603	1e-200	1149.3190997259	HIBCH
rs10208045	0.269165	0.0255833	A	G	0.120061	2	190391306	1.05931e-25	110.693991308412	HIBCH
rs146718608	-0.535277	0.0553438	C	A	0.0234299	2	190420391	5.39915e-22	93.5447061792961	HIBCH
rs147604673	-0.55557	0.0642744	C	T	0.0171912	3	191389569	6.6278e-18	74.713917824736	CCDC50
rs762810	-0.39197	0.0166978	C	A	0.343962	14	65077649	1.7359e-117	551.045103901812	MAX
rs16847450	-0.703685	0.0246472	A	G	0.116664	1	174793184	5.97571e-170	815.119736288334	CACYBP
rs11191922	0.145852	0.02486	A	T	0.127132	10	104094626	4.63533e-09	34.4209243590333	GSTO1
rs11191970	-0.922594	0.014741	G	T	0.295023	10	104245971	1e-200	3917.12435767142	GSTO1
rs1571455	-0.247768	0.0302117	A	A	0.0822127	10	104600971	2.79732e-16	67.2574044499772	GSTO1
rs1334608	-0.148302	0.016558	C	T	0.4878	10	104687920	4.20398e-19	80.2191875908323	GSTO1
rs78676038	0.299979	0.0448328	T	C	0.0356994	1	42663404	2.3818e-11	44.770297424878	PPIH
rs10788274	0.22619	0.0163057	G	G	0.472896	10	122301287	3.35385e-43	192.427840365549	PLEKHA1
rs80061974	0.170729	0.0246385	G	C	0.129696	20	32500132	4.59314e-12	48.016009557746	MAPRE1
rs414049	-0.517638	0.0171113	T	C	0.286219	20	32831982	2.29689e-189	915.137369454909	MAPRE1
rs35822882	-1.27056	0.0531232	G	T	0.0234299	6	45949262	1.00934e-121	572.034077502514	CLIC5
rs1555216	0.104475	0.0165599	C	A	0.460488	6	46010441	2.97658e-10	39.8024073278221	CLIC5
rs143131184	1.04886	0.0635432	C	T	0.0171219	1	193166834	4.14789e-60	272.456317636565	GLRX2
rs12141336	-0.248356	0.037759	A	G	0.051019	1	193231175	5.12215e-11	43.2621745250991	GLRX2
rs2454867	-0.303645	0.0257063	T	C	0.116872	16	75522922	6.64678e-32	139.525351463198	GABARAPL2
rs160589	0.488345	0.0540253	G	A	0.024539	17	3668569	1.9974e-19	81.7069720832181	TAX1BP3
rs59613942	0.307012	0.0228898	A	G	0.154721	2	86552964	1.55699e-40	179.898153446273	VPS24
rs11669629	0.682782	0.0167301	G	C	0.273673	19	32593444	1e-200	1665.58596683481	PDCD5
rs73035385	-0.261634	0.0370713	C	T	0.052544	19	32832001	1.85182e-12	49.8095628372401	PDCD5
rs149248211	-0.368605	0.0549114	C	T	0.023222	19	32838194	2.05546e-11	45.0606457368876	PDCD5
rs11573709	0.18305	0.0195203	G	A	0.228268	9	107322974	8.87281e-21	87.935956254845	RAD23B
rs13894	-0.317648	0.032488	G	A	0.06925	17	7626584	1.94016e-22	95.5974477133102	SAT2
rs1050541	-0.100574	0.0167652	T	T	0.459032	17	7657517	2.08164e-09	35.9876898364515	SAT2
rs318100	-0.281609	0.0223358	T	G	0.160543	17	48876268	4.57472e-36	158.960798773946	CALCOCO2
rs7287178	0.126388	0.0183937	C	C	0.287259	22	31043611	6.89508e-12	47.2142923901597	SMTN
rs116232009	-0.574061	0.071142	C	T	0.0135173	4	93948612	8.2237e-16	65.1124363474161	HPGDS
rs34145031	-0.522587	0.0158267	A	G	0.395744	4	94245972	1e-200	1090.27602800742	HPGDS
rs3937027	-0.367631	0.0188611	C	A	0.248371	11	122655065	1.67254e-82	379.918302216542	UBASH3B
rs78625720	-1.52849	0.0490837	G	A	0.0258561	17	75144846	7.35422e-200	969.729522322275	NT5C
rs1032859	-0.490494	0.024938	T	T	0.119437	5	119305605	6.17875e-84	386.851386041602	TNFAIP8
rs79272926	-0.216994	0.0198281	C	A	0.226189	5	119390942	1.17308e-27	119.76591864097	TNFAIP8
rs11557652	-0.516992	0.0583311	A	T	0.0207265	5	10256060	9.67837e-19	78.5538206615239	CCT5
rs72847755	0.491096	0.0648024	T	C	0.016498	10	102535686	3.93632e-14	57.431559921505	ARL3
rs8354	-0.741442	0.0278268	C	T	0.0913628	10	102676884	2.86816e-149	709.950115136208	ARL3
rs11191401	0.231782	0.0180009	A	G	0.298489	10	102813646	1.58649e-37	165.79482604118	ARL3
rs2344827	-0.149853	0.0223323	A	G	0.167267	11	6464439	2.09195e-11	45.0260632379079	TRIM3
rs10146204	-0.189337	0.0168838	G	A	0.415985	14	64352051	6.03146e-29	125.756541498253	MTHFD1
rs1542312	0.12395	0.0181102	T	T	0.306253	14	64538148	8.32243e-12	46.8432014978549	MTHFD1
rs17783344	-0.5921	0.0235545	T	G	0.133024	2	162352383	9.73135e-134	631.891251578257	GCA
rs7948329	-0.142634	0.0167957	G	G	0.430403	11	64139829	2.43564e-17	72.1190347954446	FERMT3
rs4710731	-0.508998	0.0159416	G	G	0.413282	6	170487636	1e-200	1019.45564767076	PSMB1
rs183404450	-0.270711	0.0425316	T	C	0.03972	14	60238965	2.07323e-10	40.5124366295443	PPM1A
rs7786168	-0.118414	0.0173217	T	C	0.349092	7	55364530	8.79925e-12	46.7331524751393	LANCL2
rs3124499	-0.256183	0.018144	A	G	0.289339	9	129106712	1.13073e-44	199.358400144644	CRAT
rs28458440	-0.889816	0.0221697	C	C	0.132123	1	37959071	1e-200	1610.94527994331	INPP5B
rs72663618	-0.424919	0.06234	G	C	0.0180923	1	38034753	1.01064e-11	46.4599465259232	INPP5B
rs504683	0.5338	0.0172021	A	G	0.293775	11	75340189	1.48024e-198	962.928859426307	ARRB1
rs2723211	0.147632	0.0166034	G	A	0.453487	2	210015768	7.50596e-19	79.0618450028348	RPE
rs2273175	0.110967	0.0174702	T	C	0.323167	14	103693804	2.25731e-10	40.3452059121951	KLC1
rs75517323	0.695203	0.0192551	A	G	0.196035	2	174092300	1e-200	1303.56207897222	OLA1
rs2229259	0.703511	0.0254121	C	T	0.108693	19	38816463	2.09511e-160	766.409136559888	ECH1
rs2304371	0.418086	0.0211557	G	G	0.170872	2	135803987	1.06251e-84	390.549827558671	DARS
rs145840264	0.611659	0.0519322	G	T	0.0252322	17	18258631	9.8833e-32	138.721986341834	FLII
rs12130865	-0.186871	0.0165222	T	A	0.497227	1	88930764	2.0629e-29	127.922833160468	CCBL2
rs7803810	-0.106183	0.0167774	G	A	0.424026	7	12568345	2.61678e-10	40.0553623521786	SCIN
rs1805806	-0.193941	0.0170808	T	C	0.360044	8	90005517	1.25874e-29	128.920756750333	DECR1
rs7098978	-0.481854	0.0174734	C	G	0.289824	10	22855287	3.09674e-159	760.459516915961	PIP4K2A
rs142662761	-0.960715	0.0806259	A	G	0.0105365	1	198041651	1.97312e-32	141.984191243005	NEK7
rs35309020	-0.446406	0.0289956	G	A	0.0900458	14	23554817	1.19683e-52	237.025923023465	AP1G2
rs4128518	-0.523065	0.0165602	T	T	0.319007	1	116952198	1e-200	997.654502299027	PTGFRN
rs17587765	0.221912	0.0204925	G	T	0.206294	1	117028457	4.05702e-27	117.265885562414	PTGFRN
rs397373	0.389561	0.0266412	C	T	0.106336	11	16864091	9.69332e-48	213.817564430003	PLEKHA7
rs3930909	-0.180148	0.0328814	C	T	0.0684875	2	53977785	4.42916e-08	30.0163782342431	ACYP2
rs11125524	0.383966	0.015985	T	C	0.494246	2	54152396	1.01855e-122	576.979333655487	ACYP2
rs2393124	-0.357116	0.0170976	C	G	0.347983	12	117055665	4.12392e-94	436.262930147505	TESC
rs7757606	-0.445632	0.0171826	G	A	0.307847	6	4119470	7.30361e-142	672.628055801143	ECI2
rs6589677	0.156736	0.0259784	A	A	0.113753	11	118713262	1.68564e-09	36.4009500886276	DDX6
rs17471869	0.0938728	0.016487	A	G	0.480313	10	68990113	1.29163e-08	32.4187502108785	KIAA1279
rs10741747	0.521054	0.0164329	C	T	0.341328	11	18564575	1e-200	1005.39574660734	TSG101
rs10869782	0.105905	0.0165466	A	A	0.481561	9	76485106	1.64681e-10	40.9652295191611	RFK
rs594586	-0.165003	0.0193892	G	G	0.234576	9	76699375	2.09346e-17	72.4208970520971	RFK
rs251906	-0.396104	0.0291698	C	G	0.0862332	19	39336198	1.71584e-41	184.396024371027	GMFG
rs8041035	-0.384635	0.0500775	C	T	0.0286289	15	90953012	1.78995e-14	58.9946082698172	UNC45A
rs472778	-0.238888	0.0360286	G	A	0.0551088	1	153538628	3.58673e-11	43.9636655889655	S100A6
rs60969679	0.518715	0.0422943	G	A	0.0388881	1	153546477	3.07965e-34	150.416	S100A6
rs78330892	-0.158272	0.0247421	C	T	0.127686	17	82092116	1.68513e-10	40.9199472307735	SECTM1
rs1132115	-0.350322	0.0161921	T	T	0.486899	17	82321536	1.25307e-100	468.089035742081	SECTM1
rs853974	0.129691	0.0186678	T	T	0.270415	6	126747838	4.04759e-12	48.2651209862831	RSPO3
rs2154167	-0.444226	0.0156135	T	T	0.462498	6	127166661	7.54454e-169	809.482402858925	RSPO3
rs11126696	-0.294665	0.016885	A	A	0.384167	2	79096762	7.84649e-67	304.547457241145	REG1A
rs13422544	-0.194896	0.0264194	A	T	0.109455	2	79133210	1.79958e-13	54.4201771386815	REG1A
rs11685616	0.251469	0.0367332	G	T	0.054277	2	79187880	8.22808e-12	46.8652979804226	REG1A
rs72877731	0.382069	0.0559015	C	G	0.0221822	3	58647547	8.89031e-12	46.7128839530266	FAM3D
rs7433100	-0.438052	0.0271122	T	T	0.0993345	3	58665459	1.03638e-57	261.048869017765	FAM3D
rs11666797	-0.245002	0.0227987	C	A	0.151047	19	43458246	9.81943e-27	115.483274964168	LYPD3
rs78738825	-0.242873	0.0406705	C	T	0.0435325	1	71587342	2.45893e-09	35.6614872555448	NEGR1
rs11209871	-0.238782	0.0238095	A	G	0.139817	1	71934973	1.62219e-23	100.577913132062	NEGR1
rs916510	0.168963	0.0185992	C	C	0.277901	3	120425010	1.32532e-19	82.526740987382	FSTL1
rs1471400	-0.102178	0.0173951	G	A	0.358173	4	87853095	4.44361e-09	34.5033239608171	SPP1
rs78550277	0.223069	0.0321294	T	G	0.0728546	12	91028164	4.1773e-12	48.2029047444127	LUM
rs3759223	-0.712224	0.0589871	A	G	0.0198946	12	91113006	3.01971e-33	145.787106880109	LUM
rs77651188	0.478362	0.0807301	C	T	0.0108138	12	91138494	3.25787e-09	35.1109325936889	LUM
rs1803343	-0.60556	0.0558058	T	C	0.0221822	12	91146007	3.19185e-27	117.748581511381	LUM
rs144764562	0.515794	0.0667907	G	A	0.0153196	19	43035153	1.29433e-14	59.637658188597	CD177
rs138707456	0.356833	0.0260726	A	G	0.110426	19	43132267	4.11634e-42	187.31016168594	CD177
rs74557322	-0.327718	0.0523816	T	C	0.0254402	19	43305369	4.16604e-10	39.1420053405327	CD177
rs79338083	1.54842	0.0575927	C	T	0.0196174	19	43322051	8.08567e-152	722.841	CD177
rs78530667	-0.530804	0.0238591	T	C	0.129904	19	43396545	4.16776e-106	494.948781055424	CD177
rs141280798	-0.25795	0.0357286	G	A	0.0572577	19	43453735	5.7416e-13	52.1241596603579	CD177
rs8011342	-0.170058	0.030865	A	G	0.0779149	14	69502464	3.71759e-08	30.3571902041806	SMOC1
rs1958078	-0.516105	0.0219425	A	A	0.157077	14	69888141	6.29203e-118	553.227702485947	SMOC1
rs8019103	0.159445	0.0172102	T	T	0.369818	14	70019087	2.53792e-20	85.8321468068951	SMOC1
rs61977430	-0.155558	0.022862	C	T	0.152364	14	70111634	1.09758e-11	46.2973635937636	SMOC1
rs4900218	0.221045	0.0395935	C	T	0.046028	14	94119515	2.45192e-08	31.1683349702712	SERPINA10
rs6575399	0.852455	0.0199171	G	A	0.168862	14	94213439	1e-200	1831.85340920559	SERPINA10
rs1667515	0.120834	0.0171147	G	G	0.372106	14	85227560	1.81689e-12	49.8470800025444	FLRT2
rs17796783	-0.536857	0.0172367	T	C	0.286219	14	85343567	6.30915e-200	970.083224662431	FLRT2
rs17094470	-0.309092	0.0222384	G	C	0.166158	14	85645416	2.31981e-43	193.182799000463	FLRT2
rs117932517	-0.25424	0.0437717	T	C	0.0375711	20	13980957	6.57868e-09	33.7365704623652	FLRT3
rs2423816	0.722384	0.0161104	A	A	0.297726	20	14554153	1e-200	2010.59033023711	FLRT3
rs6033994	-0.382925	0.0229191	G	A	0.149868	20	14640308	1.63621e-61	279.146587474957	FLRT3
rs11087104	-0.202348	0.0192492	C	G	0.246569	20	14714733	1.1656e-25	110.502591366078	FLRT3
rs4886578	-0.233593	0.0362355	C	T	0.0564952	15	74180694	1.21827e-10	41.5576644232874	ISLR2
rs4887134	0.289794	0.0164583	A	A	0.403438	15	74317938	5.60471e-68	310.033647839789	ISLR2
rs1789064	0.371646	0.0190072	A	A	0.238528	18	31094439	5.34985e-83	382.316143489951	DSC2
rs77239293	0.320488	0.0573053	G	T	0.0219742	18	31151789	2.31833e-08	31.277639152479	DSC2
rs55663303	-0.300135	0.0488792	A	G	0.0293221	18	31157234	8.67121e-10	37.7037986995266	DSC2
rs641180	0.147991	0.0184499	A	A	0.281575	2	74812957	1.21274e-15	64.3402251622343	HK2
rs3771788	0.0950248	0.0167276	A	A	0.415569	2	74849662	1.39359e-08	32.2705716548997	HK2
rs12520210	-0.245981	0.0170455	A	A	0.361015	5	9435193	1.46833e-46	208.249340839183	SEMA5A
rs6882340	0.908312	0.0265124	G	C	0.0917787	5	9539848	1e-200	1173.74030152158	SEMA5A
rs218052	-0.259153	0.0407813	A	C	0.0433939	5	9580161	2.21537e-10	40.382234806007	SEMA5A
rs112009052	-0.568793	0.0639164	T	A	0.0166366	19	40593595	7.02946e-19	79.1924673169626	LTBP4
rs6009946	0.401098	0.0181928	C	T	0.258214	22	50656858	2.67711e-104	486.073452893632	SHANK3
rs7019909	0.630544	0.0264335	C	T	0.100444	9	33113324	4.10638e-121	569.012036375547	B4GALT1
rs10926507	-0.188048	0.0184963	A	A	0.289408	1	241531114	4.05384e-24	103.363621237982	FH
rs4078005	0.255527	0.0442342	A	G	0.0365313	5	96083565	7.9358e-09	33.3700792391936	PCSK1
rs11744722	0.471654	0.0611855	T	A	0.0187855	5	96205127	1.44276e-14	59.4223765582578	PCSK1
rs6235	-0.999388	0.0144638	C	G	0.27395	5	96393194	1e-200	4774.23118238171	PCSK1
rs7694521	0.216886	0.0164046	G	A	0.469084	4	56755581	1.90246e-39	174.796103737294	SPINK2
rs9992616	-0.108981	0.0170896	C	C	0.402606	4	56781880	1.91709e-10	40.6665923055046	SPINK2
rs7299188	0.170914	0.0171449	C	G	0.370512	12	129289849	2.95067e-23	99.3768814323157	TMEM132D
rs139076549	0.504236	0.0609351	A	G	0.0189242	12	129568952	1.51723e-16	68.4750947011667	TMEM132D
rs10788623	-0.093119	0.0167792	G	A	0.44808	10	80439659	2.96361e-08	30.7988219845032	FAM213A
rs11247595	0.292094	0.0161227	T	T	0.491543	1	25682168	8.98231e-72	328.223540723103	MAN1C1
rs62016940	0.246684	0.0219595	A	G	0.169694	15	50425726	4.85651e-29	126.193524229854	USP8
rs71379398	-0.168555	0.0298932	T	C	0.0843616	17	50319091	1.7795e-08	31.7935090965506	CHAD
rs1054241	0.11593	0.0169181	T	T	0.403022	2	1633876	7.85921e-12	46.9557191518998	PXDN
rs10202812	0.249433	0.0192405	A	T	0.240399	2	1742696	5.19642e-38	168.064	PXDN
rs62096464	0.967674	0.0293193	T	A	0.0746569	18	47102836	1e-200	1089.3086445138	HDHD2
rs75284103	-0.958274	0.0511793	G	A	0.0257175	18	47137207	2.01041e-76	350.582898106458	HDHD2
rs4619875	0.425011	0.0161998	C	T	0.39304	4	152779978	5.60727e-145	688.305175701137	ARFIP1
rs10437954	0.310478	0.0275137	G	G	0.102731	12	57610139	2.75258e-29	127.339655079032	ARHGEF25
rs3824184	-0.172151	0.0236548	G	A	0.144045	8	2098172	3.75556e-13	52.9639709483277	MYOM2
rs2240051	0.351603	0.0168121	A	G	0.379662	19	1076684	2.43352e-94	437.382310868584	HMHA1
rs182527881	0.622983	0.0528404	C	T	0.0255095	11	65955537	8.60767e-32	139.001727747989	EIF1AD
rs72852909	-0.131846	0.0206858	G	A	0.202759	11	9423518	1.95873e-10	40.6246164998022	SWAP70
rs378825	0.548303	0.0155129	A	A	0.418688	11	9745385	1e-200	1249.26697213871	SWAP70
rs11826263	-0.199503	0.0321547	A	C	0.0714682	11	9989417	5.7907e-10	38.4954975673562	SWAP70
rs114464628	-0.311998	0.0459482	G	A	0.0341051	5	149154161	1.20875e-11	46.1069733838766	ABLIM3
rs4938104	-0.285735	0.0232605	C	G	0.149799	11	114427673	2.42718e-34	150.899843662156	REXO2
rs7122337	-0.105287	0.01866	T	C	0.271385	11	114526777	1.74078e-08	31.8365664844702	REXO2
rs12483880	0.0931995	0.0167132	C	T	0.421461	22	37655992	2.54448e-08	31.0962446473528	GGA1
rs10192144	-0.177641	0.0169584	A	G	0.377859	2	105823398	1.7119e-25	109.727799272494	NCK2
rs3769497	-0.241425	0.0344569	C	A	0.0622487	2	105873565	2.66298e-12	49.0921525590606	NCK2
rs4963151	-0.168879	0.0166356	T	C	0.433384	11	920911	4.72458e-24	103.056255559779	AP2A2
rs11119862	0.155083	0.0226827	A	G	0.164079	1	212167815	8.74388e-12	46.7454009808211	PPP2R5A
rs4648629	-0.311603	0.0164263	C	A	0.440663	1	1764023	2.39666e-78	359.851866778348	NADK
rs7801889	0.107615	0.0169482	T	C	0.381741	7	143499080	2.28901e-10	40.3179516216454	ZYX
rs2290774	-0.101033	0.0169952	T	C	0.426175	19	49871778	2.89739e-09	35.3406015949233	PNKP
rs2106331	-0.0984152	0.0173423	G	A	0.348607	17	51660546	1.44189e-08	32.2040853797719	CA10
rs1354276	0.17408	0.0171605	A	A	0.380147	17	52100122	5.09245e-24	102.905332639078	CA10
rs117399000	-0.734537	0.0480137	G	A	0.0294607	17	52136371	5.10347e-52	234.043726619828	CA10
rs79825628	0.366185	0.0210873	G	A	0.183488	4	1684828	3.32301e-66	301.54987135526	FGFR3
rs3135878	0.211748	0.0206512	G	G	0.202482	4	1802650	1.67996e-24	105.135176622368	FGFR3
rs58350690	-0.149593	0.0229148	T	C	0.153473	19	794670	7.10636e-11	42.6177386130491	ELANE
rs56283881	-0.238824	0.0187831	C	T	0.247331	19	893183	1.20812e-36	161.667005671034	ELANE
rs17050272	0.421393	0.0160361	G	A	0.425828	2	120548864	2.03557e-145	690.521368242399	INHBB
rs35341726	0.220091	0.032705	G	T	0.0684875	5	150024616	1.83217e-11	45.2872824093278	CSF1R
rs115138219	-0.625059	0.0558902	A	G	0.0223901	5	150112084	8.44862e-29	125.075053747485	CSF1R
rs340827	0.178751	0.0166923	G	A	0.4033	3	3066046	1.46863e-26	114.67390382075	IL5RA
rs77400868	0.500071	0.0232641	A	G	0.138361	3	3109280	2.14732e-99	462.051971428614	IL5RA
rs2739148	0.229893	0.0200852	T	T	0.211978	8	133071105	4.47792e-30	131.008409485472	WISP1
rs60282000	-0.292064	0.0172647	T	G	0.354291	8	133192798	5.48084e-63	286.179147241418	WISP1
rs75732302	-0.444382	0.0706279	C	T	0.0140718	12	49959342	3.31992e-10	39.5877055698617	GPD1
rs10851680	-0.211118	0.0218773	T	T	0.172466	15	60386905	6.66017e-22	93.1243129153521	ANXA2
rs8033800	0.397233	0.0165742	T	T	0.386178	15	60396980	3.3497e-122	574.414626681224	ANXA2
rs11103544	-0.331951	0.0234272	T	C	0.14155	9	134843197	5.6605e-45	200.773870906841	FCN2
rs11103563	-0.999999	0.0236189	A	G	0.112159	9	134886852	1e-200	1792.58515926239	FCN2
rs11667387	-0.11375	0.0174807	C	T	0.350132	19	39184097	8.17186e-11	42.3433458208297	PAK4
rs2930903	-0.146841	0.0170108	G	C	0.40219	19	887824	7.32069e-18	74.5152546298983	PRTN3
rs17052525	-0.193616	0.0267796	G	A	0.107791	5	159164158	5.32754e-13	52.272625699026	IL12B
rs983825	-0.58178	0.0164582	C	C	0.310065	5	159347957	1e-200	1249.54788426634	IL12B
rs7808613	-0.105985	0.0193724	C	G	0.244628	7	41707324	4.62704e-08	29.9310500254399	INHBA
rs12991615	0.150523	0.0260335	C	A	0.11611	2	182623586	7.69414e-09	33.4303260116927	FRZB
rs288326	0.637811	0.0249547	G	A	0.116595	2	182838608	5.29096e-138	653.249827283776	FRZB
rs72890325	-0.5444	0.0279908	T	G	0.0932344	2	183063340	3.66466e-82	378.273232592328	FRZB
rs1821140	-1.02947	0.0182287	C	T	0.180438	17	34326665	1e-200	3189.45144801962	CCL8
rs159247	-0.108548	0.0187391	A	G	0.26168	17	34412574	7.22183e-09	33.5541463459578	CCL8
rs31659	-0.60755	0.026257	C	C	0.10488	7	87411313	2.54907e-114	535.394421863965	CROT
rs5757442	0.116444	0.0165775	T	T	0.480937	22	39040041	2.34895e-12	49.3396606339467	APOBEC3G
rs3891126	-0.332835	0.0273062	C	G	0.10086	22	39088173	7.64756e-34	148.571478346768	APOBEC3G
rs10743185	-0.205487	0.0166913	G	G	0.431582	12	121918529	1.75144e-34	151.561319464785	PSMD9
rs856051	-0.242172	0.0214018	T	T	0.180577	1	159031502	1.946e-29	128.040468450213	IFI16
rs140841871	0.453859	0.0399842	C	T	0.0451269	2	32226651	1.3069e-29	128.844261789513	DPY30
rs148788997	0.185788	0.02578	G	C	0.118883	16	30311847	6.31456e-13	51.936118989769	SULT1A3
rs11242495	-0.32002	0.02268	A	G	0.15576	5	103535378	1.28378e-44	199.098570246571	NUDT12
rs5744681	0.259632	0.0291844	G	A	0.0859559	5	75584525	7.2043e-19	79.1434356812917	COL4A3BP
rs72684248	0.234726	0.0395802	A	C	0.0463746	14	52538492	3.16161e-09	35.1695188761751	GNPNAT1
rs2296494	-0.348992	0.0167281	G	C	0.382504	14	52783575	6.67357e-94	435.248929173175	GNPNAT1
rs114838597	0.452524	0.052167	C	T	0.0259947	4	17578371	5.0727e-18	75.2474020423568	LAP3
rs145066684	-0.272049	0.0486814	T	C	0.0294607	11	1251598	2.3759e-08	31.2297242111467	TOLLIP
rs2056083	-0.151326	0.0233187	G	A	0.149452	11	1348325	9.18299e-11	42.1132186050062	TOLLIP
rs7298739	0.139226	0.0166977	T	T	0.447941	12	104296440	8.96696e-17	69.5228206508181	TXNRD1
rs72666741	0.858735	0.0492103	G	A	0.0282129	1	32102997	7.97468e-67	304.513326051359	KPNA6
rs12978094	-0.273356	0.0425046	A	C	0.0394427	19	48809982	1.34686e-10	41.360459471922	HSD17B14
rs12577692	-0.133938	0.0178127	A	G	0.325731	11	70503671	6.17622e-14	56.5389985885086	PPFIA1
rs11210463	0.122754	0.021179	G	G	0.196312	1	74456718	7.07741e-09	33.5938984252595	CRYZ
rs12061533	0.210443	0.0228933	A	G	0.157632	1	74692434	4.94402e-20	84.4991168261931	CRYZ
rs11485299	1.03177	0.0220581	A	G	0.122487	1	74753462	1e-200	2187.91068695593	CRYZ
rs2065728	-0.186945	0.0168333	C	T	0.395051	1	74949323	1.99936e-28	123.335807436691	CRYZ
rs2287418	-0.136082	0.0166449	C	C	0.496742	2	210476432	3.4506e-16	66.8403917041529	LANCL1
rs11557236	-0.510755	0.0292133	G	A	0.0849854	16	4469438	4.54981e-67	305.67788261008	NMRAL1
rs10142660	0.185815	0.0251712	G	T	0.126022	14	104759283	1.73343e-13	54.4946287927696	ADSSL1
rs2395943	0.428481	0.0162219	A	A	0.420006	6	42972935	7.70122e-147	697.685501522619	GNMT
rs9472044	-0.323377	0.0528059	T	C	0.0259254	6	43420486	9.61227e-10	37.5019074391456	GNMT
rs2230926	0.280835	0.0478128	T	G	0.0305005	6	137874929	4.45258e-09	34.4996039535455	TNFAIP3
rs16917304	0.375336	0.0427327	T	C	0.0392347	11	27764235	1.95803e-18	77.1471301168347	BDNF
rs139644748	-0.302963	0.052769	G	A	0.024747	3	190576842	9.77661e-09	32.9625997397446	IL1RAP
rs4686558	1.27403	0.01768	A	A	0.154305	3	190632099	1e-200	5192.71859484091	IL1RAP
rs79383051	-0.316137	0.0419432	C	T	0.0408984	3	190649137	5.38528e-14	56.8103588829081	IL1RAP
rs79593794	-0.375499	0.0445208	C	A	0.0361153	3	190802174	3.98766e-17	71.1363618691944	IL1RAP
rs12247660	-0.344725	0.025727	G	A	0.11708	10	5957534	1.85383e-40	179.542499746203	IL15RA
rs8177585	0.556674	0.0161391	G	A	0.341051	10	5985828	1e-200	1189.7158572889	IL15RA
rs12414120	-0.212473	0.025957	C	T	0.115833	10	5988560	3.17751e-16	67.0036568282641	IL15RA
rs61839726	-0.154755	0.0235613	G	A	0.139956	10	6143381	5.4475e-11	43.1410668835603	IL15RA
rs11052286	0.114803	0.0182234	T	T	0.290725	12	32886492	3.15628e-10	39.6869439880621	PKP2
rs7263473	-0.458975	0.026956	G	A	0.103078	20	23709830	9.05679e-64	289.912649945652	CST4
rs1921622	0.533886	0.0153527	G	G	0.482046	2	102349607	1e-200	1209.28185893558	IL18R1
rs2287033	-0.529764	0.0154849	T	C	0.476085	2	102394777	1e-200	1170.43708813985	IL18R1
rs1476999	0.204	0.0165405	G	G	0.444475	2	102515220	1.33517e-34	152.111856756554	IL18R1
rs822688	-0.221984	0.02372	C	T	0.142728	12	53099603	1.05911e-20	87.5818221010155	IGFBP6
rs1041528	-0.133666	0.023209	T	T	0.149383	6	35222343	8.79648e-09	33.1687455432386	DEF6
rs45482297	-0.547559	0.0457004	G	A	0.0336892	6	35297758	9.08178e-33	143.556162607782	DEF6
rs62229277	-0.80311	0.0148492	C	T	0.338555	21	36118748	1e-200	2925.12179538043	CBR3
rs73202262	0.370777	0.0442081	A	G	0.036046	21	36249629	5.93788e-17	70.3431597416535	CBR3
rs1991801	0.109534	0.0180057	A	G	0.293221	5	140623810	1.23752e-09	37.0064883402832	HBEGF
rs445375	0.149995	0.0170772	T	A	0.406211	11	3034705	1.95825e-18	77.1472118967956	CARS
rs75643365	0.368019	0.06405	C	T	0.0171219	1	22441151	9.52119e-09	33.0143091422648	C1QC
rs11810828	-0.301355	0.0458047	C	T	0.0340358	1	22615195	5.06321e-11	43.2849297500429	C1QC
rs141997172	0.807774	0.0752161	A	G	0.0119229	1	22634878	1.05774e-26	115.334202822286	C1QC
rs75380810	0.962427	0.0415124	T	C	0.0395813	1	22663039	9.54354e-115	537.501785945496	C1QC
rs75837320	1.01284	0.0748712	A	G	0.0119229	1	22678038	3.4001e-41	183.000426304286	C1QC
rs115034926	0.385108	0.0604448	G	A	0.0194787	9	34551922	1.99039e-10	40.5926300857869	CNTFR
rs73645429	-0.996468	0.0605838	G	A	0.0181617	9	34594286	1.05376e-59	270.528916370386	CNTFR
rs12352811	-0.372232	0.0344651	G	C	0.0605851	9	34614684	5.51769e-27	116.645590417803	CNTFR
rs62025144	0.182369	0.027379	C	G	0.101068	15	79567101	2.92181e-11	44.3676953202367	MTHFS
rs2054288	-0.75401	0.0199115	A	G	0.175932	15	79850733	1e-200	1433.99043719013	MTHFS
rs12914081	0.179828	0.0212545	T	C	0.184875	15	80045708	3.18648e-17	71.5834857694804	MTHFS
rs73041853	0.214101	0.0278352	G	A	0.0978788	6	169203903	1.64429e-14	59.1627972183579	THBS2
rs56801796	0.154046	0.0198475	A	G	0.216276	11	73379220	9.55301e-15	60.2405918906698	RELT
rs11064321	0.289271	0.0167018	G	C	0.376958	12	6700730	7.08491e-66	299.973738921801	PIANP
rs79399329	0.245223	0.0358169	G	A	0.0564259	1	153544257	8.18705e-12	46.8755540132134	S100A4
rs4460371	0.10224	0.0165486	T	T	0.489325	8	23134288	6.83745e-10	38.1697367157537	TNFRSF10D
rs10999983	-0.165283	0.0178283	C	G	0.314363	10	71754145	2.39545e-20	85.9481448586293	C10orf54
rs12415873	0.610659	0.0227584	C	T	0.143283	10	71770478	2.98605e-151	719.969455194648	C10orf54
rs59166663	0.278786	0.0235026	A	C	0.142035	13	106647317	3.71131e-32	140.705185461602	EFNB2
rs3803241	0.175732	0.0178381	G	T	0.316512	13	106916932	9.39605e-23	97.0520056933964	EFNB2
rs3218848	-0.52083	0.0160613	G	A	0.398655	2	102007764	1e-200	1051.55161657784	IL1R2
rs1101751	0.149186	0.0180804	G	G	0.300014	12	47092599	1.84772e-16	68.083217379036	AMIGO2
rs3128111	0.307143	0.0167996	C	G	0.382227	1	995371	4.97268e-73	334.259193732576	ISG15
rs17723260	-0.138962	0.0236523	G	A	0.142243	1	155086187	4.41163e-09	34.5179785374534	EFNA3
rs2425681	-0.663194	0.0153346	A	T	0.36656	20	44918221	1e-200	1870.40766219121	YWHAB
rs2868217	0.152437	0.017172	G	A	0.370096	20	44963260	8.54692e-19	78.8023241841265	YWHAB
rs117332875	-0.46588	0.0587495	C	G	0.0203106	10	73370976	2.52354e-15	62.8839456959243	ANXA7
rs35232720	-1.01757	0.0345785	C	T	0.054485	1	9991107	7.42053e-180	865.996804636737	RBP7
rs143320801	-0.375433	0.0646532	C	T	0.0166366	1	10019021	6.63561e-09	33.719788149328	RBP7
rs2054713	0.111271	0.0167426	A	G	0.432136	8	21983023	3.23225e-11	44.1690622689726	DOK2
rs10212397	-0.689541	0.0212928	G	A	0.155345	3	133888296	1e-200	1048.70814008838	RAB6B
rs9486058	0.267964	0.046509	C	T	0.032788	6	105224729	8.67715e-09	33.1954760058964	PREP
rs1190154	0.799916	0.0229262	T	A	0.130182	6	105276659	1e-200	1217.37565894043	PREP
rs7753609	-0.33591	0.0220712	G	A	0.165257	6	105379082	1.65048e-51	231.629555365327	PREP
rs117042408	-0.489085	0.0475311	G	A	0.0305698	7	55555698	1.15961e-24	105.879762021116	VOPP1
rs34329954	0.114689	0.0199734	G	A	0.220505	21	44747002	9.73142e-09	32.9715628362469	SUMO3
rs235343	0.105019	0.0167782	A	A	0.418966	21	44829837	4.09031e-10	39.1782490994518	SUMO3
rs8133302	0.216968	0.019798	A	C	0.227298	21	44835300	9.93431e-28	120.101582973587	SUMO3
rs10955148	-0.410085	0.0172782	T	C	0.316512	8	98107592	5.77974e-120	563.314297918899	HRSP12
rs57825040	-0.115275	0.0173211	C	G	0.365659	15	40800118	3.03725e-11	44.2913914023937	DNAJC17
rs146008363	-0.212298	0.0358059	T	A	0.0571191	12	53037514	3.1861e-09	35.1546369147723	EIF4B
rs188530181	-1.43837	0.0788757	A	C	0.0108831	1	223691121	1.12989e-72	332.548336591396	CAPN2
rs10915880	0.164604	0.0230659	G	A	0.150146	1	223853332	1.05264e-12	50.9260461955015	CAPN2
rs7040705	0.493498	0.0155016	G	G	0.468876	9	136941910	1e-200	1013.48597088583	C8G
rs3825068	0.616729	0.0527134	A	G	0.0256481	11	66000622	2.45323e-31	136.882107395788	CST6
rs141412226	0.337598	0.0201955	G	A	0.204423	19	18606827	1.41945e-61	279.441246848328	CRLF1
rs1012540	-0.439129	0.0386173	A	T	0.0483849	15	80953751	1.03993e-29	129.306520526925	MESDC2
rs2663943	-0.0999867	0.0174504	G	G	0.346319	15	81096638	1.04619e-08	32.8302127630052	MESDC2
rs1807590	-0.092472	0.0168216	G	A	0.41647	22	41313231	3.9903e-08	30.2194042305145	CCDC134
rs11090057	0.361625	0.0168082	G	A	0.357688	22	41735443	1.4497e-99	462.886461956194	CCDC134
rs11704061	0.396112	0.0620533	G	C	0.0175378	22	41832344	1.8393e-10	40.7479940533646	CCDC134
rs72913277	-0.336005	0.0428031	A	G	0.039512	2	79140251	4.76174e-15	61.6227439194902	REG3A
rs116652994	0.465378	0.0350482	A	G	0.0587828	2	79163078	9.04849e-40	176.311345950361	REG3A
rs76473891	0.33122	0.0536436	G	C	0.0246083	7	49504033	6.99955e-10	38.1238958734539	VWC2
rs75731564	0.328445	0.0512932	C	A	0.02648	7	49644661	1.6162e-10	41.0020642436024	VWC2
rs148681119	0.837146	0.0556706	C	A	0.0222515	7	49718162	2.40441e-50	226.126056450376	VWC2
rs77510717	-0.598638	0.0546142	G	A	0.0230833	7	49731032	9.70862e-28	120.148238991533	VWC2
rs1876569	-0.639182	0.0221821	A	T	0.142798	7	49782154	6.4806e-173	830.316665764793	VWC2
rs76707602	0.272402	0.0458455	C	A	0.0336892	7	50220893	2.9516e-09	35.3042635560437	VWC2
rs113965554	0.398846	0.0458149	G	A	0.0336892	1	24394806	3.8701e-18	75.7873978463241	CLIC4
rs4649017	-0.258788	0.0167082	T	C	0.373492	1	24746529	2.96283e-53	239.899276414888	CLIC4
rs116891509	0.557124	0.0311312	C	T	0.0734091	16	72071661	4.09363e-70	320.266867507223	TXNL4B
rs60169972	-0.149609	0.0212386	G	C	0.186469	12	93837506	2.03768e-12	49.6207893807328	CRADD
rs71666209	-0.295397	0.0428283	G	A	0.0388881	1	88989898	5.75183e-12	47.571899038758	GBP1
rs61798920	-0.168436	0.0173204	C	T	0.35034	1	89051436	3.23899e-22	94.5701338381662	GBP1
rs117551362	0.285625	0.0385448	G	A	0.0490087	22	31104089	1.40443e-13	54.9111882483167	SELM
rs5029993	0.145151	0.0261537	G	A	0.114446	3	186721506	2.95929e-08	30.8016363232867	KNG1
rs5030062	0.313407	0.0166336	A	C	0.37682	3	186736391	2.4184e-77	355.013507710947	KNG1
rs10466533	1.09581	0.028451	A	G	0.0778456	11	116741412	1e-200	1483.45865724277	APOA5
rs6589568	-0.182613	0.0204429	G	G	0.206086	11	116800022	5.19795e-19	79.7954951497076	APOA5
rs12721046	0.143516	0.0228703	G	A	0.155691	19	44917997	3.69377e-10	39.3782960695073	APOC1
rs5112	-0.307528	0.0162896	C	C	0.466449	19	44927023	1.24059e-77	356.40885653784	APOC1
rs2424963	0.320032	0.0165234	T	T	0.413282	20	33106642	1.6357e-81	375.135339232098	BPIFB1
rs16879245	-0.381904	0.0296743	A	G	0.082074	7	33764873	1.71716e-37	165.633221303826	BMPER
rs34372750	-0.143123	0.0188842	T	C	0.262443	7	34062779	3.91716e-14	57.4409586169578	BMPER
rs2058681	-0.1525	0.0177523	A	G	0.316512	7	34154490	1.05055e-17	73.7955935708193	BMPER
rs16864962	0.889761	0.0278053	G	A	0.0863025	1	149757787	1e-200	1023.98020530834	BOLA1
rs388488	-0.113932	0.0205142	C	C	0.205878	3	148645190	2.89457e-08	30.8448222461353	CPB1
rs56745771	-0.115322	0.0172467	C	T	0.370581	3	148827514	2.45454e-11	44.7108	CPB1
rs13318851	0.409447	0.019168	G	C	0.227506	3	148844610	3.23915e-98	456.290876726518	CPB1
rs7321110	-0.316373	0.0395037	T	C	0.046028	13	32956017	1.3419e-15	64.1391612716521	KL
rs9527032	0.213542	0.0227746	G	C	0.151601	13	33056892	8.96809e-21	87.9154282280571	KL
rs113974900	-0.564762	0.0429456	T	C	0.0375711	4	119118550	4.73833e-39	172.939255742862	FABP2
rs9684327	-0.492483	0.0155893	A	A	0.488146	4	119444286	1e-200	997.99705113358	FABP2
rs2127826	-0.145183	0.016659	A	G	0.470678	4	119504060	3.56425e-18	75.9510314380848	FABP2
rs72680980	-0.259705	0.0401699	A	G	0.0452655	4	119743208	1.07793e-10	41.7983483268752	FABP2
rs1486006	-0.172477	0.0217118	G	C	0.183072	8	81478382	2.25663e-15	63.1060096677529	FABP4
rs62172729	-0.252313	0.0210351	C	T	0.19042	2	205182223	7.75233e-33	143.876575654852	NRP2
rs3771004	0.162317	0.0181104	C	T	0.285942	2	205766163	3.98008e-19	80.3289202671524	NRP2
rs77584890	-0.264896	0.0367398	C	T	0.0542077	1	161098329	6.1608e-13	51.9849014674412	FCGR3A
rs11265586	0.139104	0.0252275	T	C	0.121655	1	161311164	3.62906e-08	30.404005843524	FCGR3A
rs332395	-0.522397	0.0158034	T	C	0.411618	1	161537655	1e-200	1092.69833948011	FCGR3A
rs3754053	0.223089	0.016807	C	C	0.4094	1	161606054	9.6147e-40	176.187832729373	FCGR3A
rs6602909	-0.405253	0.0171732	T	C	0.322335	13	113849020	1.16097e-118	556.865126906398	GAS6
rs145365000	0.441676	0.0678106	G	C	0.0154582	10	71047349	7.84221e-11	42.4240794838071	UNC5B
rs7907590	0.262621	0.0234328	G	G	0.141758	10	71292875	6.4963e-29	125.606041731858	UNC5B
rs13419	0.137846	0.018499	A	G	0.282615	10	71299632	1.02976e-13	55.5254173876345	UNC5B
rs116362610	0.411154	0.0612113	C	G	0.0185082	1	109397043	1.99681e-11	45.1175837611827	GSTM1
rs115181845	0.463196	0.0315545	C	T	0.0721614	1	109510351	4.30877e-48	215.480013866343	GSTM1
rs2269340	0.627972	0.0306016	T	C	0.0752807	1	109629614	5.36261e-91	421.106835965429	GSTM1
rs115929572	0.767389	0.0302131	G	A	0.0751421	1	109703431	2.21256e-136	645.120084422113	GSTM1
rs7112492	0.190473	0.0216972	G	G	0.174962	11	18383963	2.03989e-18	77.0654040491565	LDHA
rs7244879	-0.138506	0.017872	A	A	0.319077	18	63484141	1.04587e-14	60.0607654556744	SERPINB5
rs17010021	-0.290539	0.0442673	T	A	0.0367392	2	74534412	5.62863e-11	43.0767378411524	LOXL3
rs1713422	-0.645672	0.0201705	A	G	0.177873	14	20472675	1e-200	1024.6854720052	PNP
rs1756361	-0.187432	0.0169397	T	C	0.384514	14	20488615	3.13889e-28	122.426673479462	PNP
rs6044716	-0.131171	0.0165402	A	T	0.494246	20	17269967	2.51464e-15	62.8918175213348	PCSK2
rs141907998	0.504079	0.06455	C	T	0.0167753	5	151039906	6.57397e-15	60.982428728953	GM2A
rs137896815	-0.523212	0.0409484	C	T	0.0416609	5	151242931	5.51578e-37	163.260648845999	GM2A
rs153444	0.583295	0.0183377	C	A	0.230903	5	151274434	1e-200	1011.78160737089	GM2A
rs56060952	0.467346	0.0250176	T	C	0.11916	15	45036783	4.35189e-76	348.968133858936	SORD
rs28662287	-0.25599	0.025053	C	C	0.125191	15	45068813	2.41302e-24	104.40625638943	SORD
rs58198139	0.2057	0.0171373	C	C	0.364827	5	156972028	7.03433e-33	144.07339313785	TIMD4
rs2593335	0.231981	0.0164681	C	C	0.499515	6	85378941	1.77692e-44	198.434801643532	NT5E
rs6903114	0.464768	0.0171471	T	T	0.311174	6	85696953	3.72926e-154	734.667919194775	NT5E
rs10982050	-0.150718	0.0192038	A	G	0.242132	9	114066493	4.82487e-15	61.5964802412924	AMBP
rs1042499	0.21923	0.0352545	T	C	0.0594759	15	89785074	5.29933e-10	38.6697040618278	ANPEP
rs13015258	0.124202	0.0168236	T	T	0.394704	2	162074215	1.72601e-13	54.5028623100497	DPP4
rs3020726	0.510069	0.0217112	A	G	0.165604	2	86789383	1.14879e-117	551.937882647571	CD8A
rs13199337	0.143297	0.0218324	C	T	0.175378	6	70279372	5.62031e-11	43.0795578637797	COL9A1
rs67908756	-0.939397	0.0169717	T	G	0.205254	1	196852250	1e-200	3063.70993638456	CFHR1
rs61820789	0.118008	0.0168808	G	C	0.425551	1	197022933	2.98052e-12	48.8693824558994	CFHR1
rs13164140	0.46273	0.0185465	G	A	0.247193	5	74734513	7.39451e-132	622.48857656129	HEXB
rs113358700	-0.13651	0.0236412	G	C	0.147511	5	74923508	8.05189e-09	33.3418658041259	HEXB
rs7905887	-0.556881	0.0161008	A	A	0.350964	10	116607656	1e-200	1196.27187003593	PNLIPRP2
rs74158811	0.283049	0.0318253	C	T	0.0703591	10	116641866	7.36286e-19	79.1003194372024	PNLIPRP2
rs146461815	0.545669	0.0518151	C	T	0.0265493	10	116650690	9.54745e-26	110.903660881218	PNLIPRP2
rs73604783	0.909092	0.0662442	T	C	0.0155968	6	149566749	2.4966e-42	188.330193494003	LRP11
rs35830138	0.864711	0.0140913	T	C	0.365105	6	149668635	1e-200	3765.64907622042	LRP11
rs75672805	-0.440953	0.0585709	A	G	0.0203106	6	149804154	5.7549e-14	56.6788210886868	LRP11
rs76070947	-0.243084	0.039641	C	G	0.0456814	20	45484646	9.12857e-10	37.6030909398939	PLTP
rs58952297	-0.737273	0.019698	C	T	0.184389	20	45932181	1e-200	1400.92	PLTP
rs73312715	0.192722	0.0345892	C	T	0.0609317	20	46157375	2.61296e-08	31.0442772177629	PLTP
rs430298	0.584061	0.0188785	G	T	0.218148	2	79022646	1.89688e-197	957.153180669276	REG3G
rs140715469	0.342595	0.039762	T	C	0.0449189	2	79078756	8.41429e-18	74.2378864070959	REG3G
rs909975	-0.120073	0.0177279	G	A	0.338278	6	132693852	1.35926e-11	45.8750062585943	VNN2
rs12526754	-0.547609	0.015512	T	A	0.40025	6	132739056	1e-200	1246.25112176292	VNN2
rs9483499	0.60039	0.0221169	A	G	0.149868	6	132755757	1.34307e-154	736.916688031774	VNN2
rs4970350	-0.294348	0.0166672	G	G	0.427423	1	1036800	2.29684e-68	311.886721304864	AGRN
rs73163584	0.357195	0.0599093	C	G	0.0194094	7	150772831	2.60496e-09	35.5485795346169	AOC1
rs6977381	0.671188	0.0148534	G	G	0.444406	7	150845558	1e-200	2041.91008019418	AOC1
rs3778871	0.177913	0.0269209	A	C	0.106474	7	150973684	4.15262e-11	43.6753321184582	AOC1
rs76875916	-0.460061	0.0391383	T	C	0.0469985	16	55818117	1.29524e-31	138.17418845363	CES1
rs74019283	-0.247582	0.0434671	G	T	0.0378483	16	55836327	1.27585e-08	32.4426858541063	CES1
rs551243	0.0955545	0.0167382	G	C	0.479343	11	66307012	1.18309e-08	32.5900317111139	CD248
rs73230203	0.192551	0.0286293	G	A	0.0925412	4	15962080	1.88179e-11	45.2345316420804	FGFBP1
rs17884883	-0.119703	0.0167187	T	T	0.401983	11	72097010	8.8759e-13	51.2631229569439	FOLR3
rs590586	0.801255	0.023889	T	T	0.118605	11	72156123	1e-200	1124.98197584966	FOLR3
rs79341752	0.325506	0.0369386	A	G	0.0524054	11	72287283	1.5199e-18	77.6528024552788	FOLR3
rs138318457	-0.55941	0.042679	C	T	0.0386108	20	3292219	8.27706e-39	171.803489687909	ATRN
rs151544	-0.656063	0.0332792	G	C	0.0641203	20	3503901	2.63991e-84	388.63806542389	ATRN
rs144469244	-0.843718	0.0758405	C	G	0.0119922	20	3816499	1.61806e-28	123.763406332258	ATRN
rs360078	-0.331182	0.0169318	G	A	0.354707	1	225896277	4.708e-83	382.584339790734	LEFTY2
rs10799316	0.114486	0.0194382	G	G	0.245876	1	225480329	4.04247e-09	34.6890711622012	LEFTY2
rs360088	0.72069	0.015092	G	G	0.363718	1	225869991	1e-200	2280.35991892188	LEFTY2
rs4653441	-0.218726	0.0257313	G	G	0.116456	1	226107091	2.27298e-17	72.2565738554815	LEFTY2
rs1123363	0.286662	0.0455028	G	A	0.0337585	17	42080196	3.15392e-10	39.688438265317	NAGLU
rs72823057	-0.224002	0.0331152	G	C	0.0674477	17	42415242	1.44439e-11	45.7561028209012	NAGLU
rs41283429	1.0998	0.039432	C	T	0.0419382	17	42480711	1.15262e-162	777.910834766651	NAGLU
rs4821839	1.62178	0.0588682	G	A	0.0186469	22	38831788	6.09312e-159	758.966081096726	NPTXR
rs735306	-0.14004	0.0169834	C	T	0.385554	22	38864027	1.93396e-16	67.9915477293687	NPTXR
rs1060506	0.124778	0.0182774	C	T	0.294191	16	31122128	9.38297e-12	46.6065770117524	PRSS8
rs3863090	-0.144174	0.024947	G	T	0.126993	3	165666699	7.81849e-09	33.3992905236489	BCHE
rs62295996	-0.438648	0.0198952	G	A	0.203106	3	165764276	2.63325e-104	486.111268404112	BCHE
rs148077724	-0.29932	0.0409249	A	G	0.0422848	3	165952844	2.87481e-13	53.492909419538	BCHE
rs10430893	-0.799678	0.0254269	C	T	0.104395	11	18259448	1e-200	989.107435153579	SAA1
rs76204461	0.232937	0.0313111	C	T	0.0752114	11	18493515	1.12817e-13	55.3452438564917	SAA1
rs151172395	1.481	0.0611696	G	A	0.0176071	11	18195559	1.4261e-124	586.190581072093	SAA4
rs4757629	0.590198	0.0150417	C	C	0.470331	11	18224223	1e-200	1539.57773467376	SAA4
rs10430893	-0.549938	0.02633	C	T	0.104395	11	18259448	4.16846e-94	436.240258064367	SAA4
rs35331030	1.78296	0.060609	C	T	0.0167059	1	9751595	9.76847e-180	865.384202642344	CLSTN1
rs114513597	-0.692718	0.0664827	G	A	0.0158048	1	9769606	3.04935e-25	108.566452729319	CLSTN1
rs72729437	0.262566	0.0439333	A	G	0.0370858	9	35963179	2.38884e-09	35.7181802067597	GLIPR2
rs10814339	-0.353374	0.0182988	A	C	0.269444	9	36154681	4.68346e-81	372.927117256337	GLIPR2
rs11794302	-0.293745	0.04962	T	C	0.0288368	9	113131922	3.36928e-09	35.0451114991468	ALAD
rs7025333	0.174843	0.0168566	C	T	0.419728	9	113353500	4.96408e-25	107.586192153446	ALAD
rs1800435	-0.67226	0.0297402	C	G	0.0797865	9	113391611	2.30641e-109	510.959846580278	ALAD
rs6956492	-0.129707	0.0195828	A	G	0.234992	7	44064620	3.76011e-11	43.8709715589225	PGAM2
rs2602885	-0.143485	0.0211413	C	C	0.185221	4	99119979	1.2365e-11	46.0627249510624	ADH1C
rs1789911	-0.529572	0.0156637	T	C	0.40628	4	99342621	1e-200	1143.03970354541	ADH1C
rs2718686	0.105783	0.017593	A	A	0.34119	4	99517329	1.91251e-09	36.1536336932269	ADH1C
rs6088642	-0.438391	0.0162007	G	G	0.375711	20	34895383	1.1254e-153	732.243793754604	GSS
rs3735602	-0.0968738	0.0169326	A	A	0.420907	7	107923141	1.10057e-08	32.7315	DLD
rs3767541	-0.180995	0.0174334	C	C	0.346527	1	201486782	4.49169e-25	107.787640543872	CSRP1
rs314345	-0.258365	0.0165199	G	G	0.472064	7	100799705	3.02103e-54	244.597792439058	EPHB4
rs41341748	-1.49438	0.0783621	G	A	0.0102593	8	16155085	3.86649e-79	363.672080540051	MSR1
rs7831768	-0.506351	0.0309684	C	T	0.0749341	8	16169622	4.92626e-59	267.341147785186	MSR1
rs10256	0.345975	0.0380857	A	G	0.0491474	7	76066295	1.32876e-19	82.5212032188664	MDH2
rs71386687	0.192378	0.0312443	G	T	0.077083	16	2717893	7.80119e-10	37.9113467592123	PRSS27
rs2876803	0.158333	0.0222406	T	A	0.168723	13	83794650	1.19132e-12	50.681549305093	SLITRK1
rs359276	-0.111299	0.0181517	G	A	0.293775	10	17271304	9.16023e-10	37.5965430705951	VIM
rs2614819	-0.260674	0.0274066	C	A	0.0986413	15	43604248	2.50916e-21	90.4659419966464	CKMT1A
rs2569441	-0.137146	0.0170209	C	T	0.394427	19	51011366	9.04445e-16	64.923399270893	KLK14
rs2691224	-0.103894	0.0165272	G	A	0.495702	19	51041887	3.44244e-10	39.5168546231059	KLK14
rs17658926	0.279168	0.020928	G	A	0.192916	19	51081153	4.06902e-40	177.940914064473	KLK14
rs11666870	-0.244253	0.0161602	A	A	0.477956	19	51095412	7.76786e-51	228.447468827442	KLK14
rs12076610	0.612807	0.0276844	G	T	0.093789	1	103521319	4.28099e-105	489.978703231195	AMY2B
rs114500706	-0.532566	0.0391361	A	G	0.0469985	1	103849546	1.16914e-41	185.17902090466	AMY2B
rs77395797	-0.618082	0.0770128	C	T	0.011715	1	103869827	1.16973e-15	64.4119378240697	AMY2B
rs4847148	-0.413726	0.0672126	C	A	0.0154582	1	103907224	7.8864e-10	37.8899679070419	AMY2B
rs13132825	-0.349773	0.0369437	G	T	0.0535145	4	110223610	3.79336e-21	89.6379232435268	ENPEP
rs28421498	-0.19579	0.0287054	T	C	0.0924719	4	110479469	9.79662e-12	46.5215104421034	ENPEP
rs11735606	0.382592	0.0172796	C	G	0.322751	4	110517862	3.8011e-105	490.235096355287	ENPEP
rs17004062	-0.187876	0.0222085	G	A	0.16498	4	79685611	3.2149e-17	71.5655737315579	ANTXR2
rs10009674	0.379264	0.0184663	T	A	0.249896	4	79880234	3.82647e-91	421.816407661174	ANTXR2
rs55679829	-0.451958	0.054095	A	G	0.0240538	22	30604644	7.78349e-17	69.8042565529326	TCN2
rs5753259	0.820184	0.0140535	T	T	0.407736	22	30634541	1e-200	3406.07016188356	TCN2
rs111351288	-0.447123	0.0778491	G	A	0.011507	22	30635968	9.65374e-09	32.9873044581236	TCN2
rs5997786	0.209191	0.0229389	C	T	0.150908	22	30858049	9.63188e-20	83.1650428694122	TCN2
rs2949690	-0.177169	0.0165544	C	T	0.445515	7	66018255	1.57144e-26	114.538	GUSB
rs193266507	-0.288148	0.0329812	T	C	0.0662692	19	8854282	2.9477e-18	76.3305361386374	MUC16
rs8110763	-0.0966851	0.016631	T	T	0.486829	19	9020790	6.37765e-09	33.7973286114469	MUC16
rs138405741	-0.325829	0.0475807	C	T	0.0318869	19	11543596	8.11042e-12	46.8940580820519	CNN1
rs74810716	0.153573	0.026717	T	G	0.105157	1	207333596	9.39245e-09	33.0410891993856	CR2
rs61821130	-0.237385	0.0263242	C	A	0.112575	1	207457543	2.42444e-19	81.319777688661	CR2
rs2228603	-0.451966	0.030094	C	T	0.0811036	19	19219115	3.17631e-50	225.554604650317	NCAN
rs111391792	-0.370047	0.0311392	T	C	0.0737557	14	20875328	2.87624e-32	141.220867067594	RNASE3
rs147307766	0.946463	0.0365163	C	T	0.0497019	14	20917832	1.0718e-141	671.79033106856	RNASE3
rs150971918	-0.46435	0.0717985	G	C	0.0134479	14	20976668	1.06208e-10	41.8273314167867	RNASE3
rs7037264	0.489293	0.0158671	G	A	0.403022	9	134883366	2.98792e-196	950.917604455557	FCN1
rs7873100	0.314048	0.0186976	C	G	0.261403	9	134964997	3.90701e-62	282.11120415432	FCN1
rs61801180	0.697481	0.0360986	G	C	0.0538611	1	161718974	3.87876e-81	373.322396280802	FCRLB
rs2880055	0.256043	0.0238511	C	C	0.138639	1	161952575	1.10769e-26	115.241522596007	FCRLB
rs10754206	0.551734	0.015247	T	G	0.469361	1	196851794	1e-200	1309.45535129501	CFHR2
rs12130270	0.244045	0.0203488	T	C	0.204215	1	197309163	7.9152e-33	143.834219780796	CFHR2
rs144856539	-0.439409	0.0662235	C	T	0.0160821	1	197349023	3.47459e-11	44.0264467011822	CFHR2
rs2267994	0.14798	0.017247	A	G	0.35644	14	91890602	1.1487e-17	73.6171362690178	FBLN5
rs80345326	0.393716	0.0529326	T	C	0.0249549	11	72216368	1.13984e-13	55.3247773828224	FOLR2
rs7697091	-0.160771	0.0171732	A	C	0.360876	4	71759380	1.02807e-20	87.6421394473671	GC
rs2139646	0.132789	0.0172946	A	A	0.35034	4	71905686	1.82826e-14	58.9526262508942	GC
rs9823546	-0.16557	0.0182205	T	A	0.291834	3	49668079	1.29437e-19	82.5738846925714	GPX1
rs7074542	-0.190676	0.0179041	C	T	0.308679	10	122353283	2.73656e-26	113.419329547237	HTRA1
rs1044977	0.210601	0.0189678	T	C	0.25759	17	45149847	2.05706e-28	123.278384521719	HEXIM1
rs6688376	-0.196202	0.0181997	C	T	0.299043	1	154353890	6.81739e-27	116.219339176199	IL6R
rs12753254	0.992553	0.0121309	G	A	0.405864	1	154444459	1e-200	6694.54965810194	IL6R
rs61103655	-0.172403	0.0184929	C	T	0.280743	1	154657590	1.48049e-20	86.9119702040619	IL6R
rs246413	0.143417	0.0177592	G	A	0.321226	5	52982280	7.80785e-16	65.2160470007168	ITGA2
rs11741142	0.340169	0.0202635	T	C	0.204977	5	180307139	4.51469e-62	281.812689803353	MAPK9
rs114838597	0.520345	0.0520792	C	T	0.0259947	4	17578371	2.35653e-23	99.8284120462156	LAP3
rs4802563	0.162023	0.0167265	C	A	0.40933	19	49116979	4.68307e-22	93.8303181257342	LIN7B
rs2151868	-0.583312	0.0259809	T	C	0.107584	19	54593448	5.79332e-108	504.073004083999	LILRA2
rs112045636	0.302682	0.0438962	G	A	0.0366006	19	54079321	5.82578e-12	47.5465859352944	LILRB3
rs145888232	-0.496734	0.0563325	C	T	0.0223208	19	54211473	1.44388e-18	77.7552502890138	LILRB3
rs12978577	0.523234	0.0167712	T	A	0.309511	19	54213755	1.49848e-200	973.337907656914	LILRB3
rs12984962	-0.181135	0.0175479	T	C	0.346458	19	54265351	8.30791e-25	106.550244149348	LILRB3
rs4656601	0.221446	0.0205592	T	A	0.198045	1	168538235	7.5367e-27	116.017434384109	XCL2
rs497383	0.230434	0.0184662	A	G	0.270345	3	173407133	2.25826e-35	155.717724013131	NLGN1
rs12742444	0.731954	0.0345143	C	T	0.0589214	1	21854230	7.08969e-97	449.748203817923	HSPG2
rs2005772	-0.142168	0.0202972	G	G	0.200957	19	42881078	2.70615e-12	49.0604407538912	PSG1
rs10882283	-0.18099	0.0170941	A	C	0.385138	10	93601207	5.26186e-26	112.102856646879	RBP4
rs56296467	-0.471633	0.0178607	T	C	0.268751	6	168463127	9.25181e-147	697.286758743236	SMOC2
rs187316322	0.444427	0.0732782	G	A	0.0128934	6	168502959	1.38679e-09	36.7833504914951	SMOC2
rs56284947	-0.185596	0.0185868	A	C	0.271524	6	168595562	2.50283e-23	99.7075333279129	SMOC2
rs10989102	-0.241732	0.0253666	T	C	0.12221	9	100475300	2.11068e-21	90.812110549093	TMEFF1
rs62240447	-0.213645	0.0353668	A	G	0.0579509	3	15132809	1.60944e-09	36.4916863774258	BTD
rs144961978	-0.375771	0.0636946	T	C	0.0174685	3	15487998	3.80935e-09	34.8049722514034	BTD
rs35034250	-0.920398	0.0535202	C	T	0.0241231	3	15645027	5.44191e-65	295.74395553957	BTD
rs13092272	-1.44351	0.0390729	T	C	0.0401359	3	15655776	1e-200	1364.86061554175	BTD
rs9488842	-0.362481	0.0183708	A	C	0.26577	6	116123005	1.9009e-84	389.326850383099	COL10A1
rs17078099	-0.387533	0.0627005	T	C	0.0177457	6	116594928	6.72925e-10	38.2010563639965	COL10A1
rs6815075	-0.145507	0.0258263	G	A	0.11715	4	107118897	1.82637e-08	31.7426653395781	DKK2
rs1098740	0.172812	0.0168139	G	G	0.401775	12	56976126	1.30941e-24	105.63573844542	INHBC
rs7489231	-0.519778	0.0162766	C	C	0.345973	12	57220701	1e-200	1019.78449808921	INHBC
rs4760244	-0.555595	0.0151596	A	T	0.476085	12	57443604	1e-200	1343.20151522748	INHBC
rs71461327	0.303945	0.038056	C	T	0.0499099	12	57485801	1.60038e-15	63.7886968765513	INHBC
rs4244610	-0.137154	0.0164884	G	A	0.47553	8	144512131	1.05779e-16	69.1926440756289	GPT
rs1130379	-0.255045	0.0267445	C	T	0.107584	5	180612606	1.97808e-21	90.9420336691912	FLT4
rs6690982	-0.318737	0.0199286	G	A	0.220782	1	196662999	1.31427e-56	255.806385286647	CFHR5
rs35662416	-1.20255	0.0519707	G	A	0.0239152	1	196998224	2.52583e-114	535.413296690353	CFHR5
rs7775650	0.221555	0.0216321	G	C	0.177457	6	159820408	1.89017e-24	104.897647188157	IGF2R
rs220727	-0.109706	0.0197064	T	C	0.229308	6	159902832	2.68486e-08	30.9917552257981	IGF2R
rs3777404	0.870276	0.022201	G	A	0.135311	6	160077017	1e-200	1536.6286996289	IGF2R
rs1151582	-0.501841	0.0156894	C	T	0.460557	14	52016050	1e-200	1023.10359091355	NID2
rs1557192	-0.145171	0.0165246	G	G	0.471648	14	52188223	1.92726e-18	77.1787651568197	NID2
rs462847	-0.10588	0.0166097	C	T	0.460003	12	64920170	1.94791e-10	40.6353765421534	WIF1
rs4543082	0.164147	0.0207069	C	C	0.202828	4	48186832	2.58003e-15	62.8399350308054	TEC
rs4674597	0.160647	0.0166189	T	C	0.431305	2	221423124	5.68217e-22	93.441691240651	EPHA4
rs16862777	-0.291608	0.018375	G	C	0.274088	2	221490753	8.95007e-56	251.851286153732	EPHA4
rs2680844	0.235331	0.0311113	A	A	0.077083	2	221569000	4.38736e-14	57.2165889551398	EPHA4
rs17109804	0.156248	0.0218296	A	G	0.17004	12	71551792	9.01677e-13	51.2315361620822	LGR5
rs35800540	-0.452132	0.0648785	C	T	0.0167753	12	71734869	3.47655e-12	48.5656147624678	LGR5
rs143332484	-1.5304	0.0796624	C	T	0.0104672	6	41161469	2.94865e-80	369.065238148587	TREM2
rs2448001	0.170415	0.0172143	G	A	0.361916	11	27372266	5.85139e-23	98.0024432888647	LGR4
rs3108622	-0.290632	0.0164437	G	A	0.433176	8	35257097	1.80978e-68	312.383273275597	UNC5D
rs16884340	0.908818	0.0826236	C	T	0.0101899	8	35731786	6.40021e-28	120.988923515135	UNC5D
rs1465697	-0.160239	0.0190946	C	T	0.246985	19	49333989	5.70402e-17	70.4231297131624	DKKL1
rs78197611	0.496669	0.0285246	C	T	0.0885207	12	51924840	1.51717e-66	303.176113935344	ACVRL1
rs116498185	0.20891	0.0366272	C	T	0.0537224	5	139190262	1.21882e-08	32.5320190810713	PACAP
rs77243175	-0.168848	0.0250711	A	C	0.124428	4	38751996	1.76834e-11	45.3570774466014	TLR1
rs5743618	0.290832	0.0182813	C	A	0.274851	4	38797027	4.914e-56	253.087227693587	TLR1
rs6660098	0.210473	0.0382338	T	T	0.049286	1	171471775	3.8212e-08	30.3038532813385	MYOC
rs235879	-0.434479	0.01607	T	T	0.411757	1	171646796	1.99774e-153	730.980559310174	MYOC
rs56178029	-0.212471	0.0187272	C	T	0.260363	1	171785024	1.38787e-29	128.722251237926	MYOC
rs1268538	-1.12335	0.0369558	C	T	0.047553	19	58341997	4.5426e-191	923.985089698433	A1BG
rs6476431	-0.450523	0.0167978	G	A	0.350964	9	34018770	3.98576e-151	719.331572552715	NUDT2
rs4879786	0.672091	0.0213288	G	G	0.158048	9	34421593	1e-200	992.94070753378	NUDT2
rs4554562	0.154737	0.0174114	C	T	0.339249	9	34819398	7.81808e-19	78.9806965343492	NUDT2
rs641320	-0.727406	0.0315316	G	A	0.0695966	3	138629115	1.1401e-113	532.183910998657	FAIM
rs12269149	-0.126512	0.018459	C	T	0.283655	10	130146915	7.79015e-12	46.972870789164	GLRX3
rs9507306	0.19354	0.0305278	C	A	0.0795092	13	24328550	2.43922e-10	40.1930032167529	C1QTNF9
rs56069023	-0.341222	0.0175055	A	G	0.3136	13	24357997	1.65111e-82	379.948740108016	C1QTNF9
rs2229542	-0.907527	0.0740315	T	C	0.0122695	7	134450869	3.30126e-34	150.274749039237	AKR1B1
rs782545	0.645917	0.0479378	A	G	0.0304312	7	134503187	6.92574e-41	181.55040898509	AKR1B1
rs10985196	-0.158452	0.0201285	C	A	0.20872	9	121270766	3.99984e-15	61.9687344146842	GSN
rs35854130	-0.17087	0.0203919	G	T	0.208096	19	35861033	6.33984e-17	70.2127936788581	KIRREL2
rs182793305	0.531241	0.0590868	G	A	0.0194094	14	22894897	3.08882e-19	80.8355189106319	LRP10
rs2251734	0.271719	0.0182769	G	A	0.278802	8	94146031	2.88783e-49	221.021714713861	CDH17
rs12056840	-0.340079	0.0161707	G	A	0.469777	8	94191166	2.39724e-95	442.284774906485	CDH17
rs36043533	0.760438	0.0367423	T	G	0.051019	1	37613845	1.7432e-92	428.346225364318	RSPO1
rs116685741	-0.395959	0.0600941	C	T	0.0194094	1	37627295	4.74015e-11	43.4147	RSPO1
rs238238	0.359933	0.017708	A	A	0.292597	17	4953081	2.33029e-89	413.146716771746	ENO3
rs72947565	0.30884	0.0435168	T	C	0.0371551	2	159466884	1.39618e-12	50.3678233708795	LY75
rs7599157	-0.735907	0.0148491	C	T	0.393456	2	159900954	1e-200	2456.09750545129	LY75
rs3063683	-0.406598	0.0203444	C	A	0.199016	2	160009707	1.56403e-86	399.430021716821	LY75
rs1925949	-1.45428	0.0464961	G	G	0.0287675	1	156592216	1e-200	978.279627953024	APOA1BP
rs198375	0.0956982	0.0170112	T	C	0.403993	1	11853700	1.91778e-08	31.6473709153952	NPPB
rs2839107	0.128349	0.0165668	G	A	0.44198	21	46082477	1.06665e-14	60.0216209691739	COL6A2
rs35548026	-0.548396	0.0288366	G	A	0.0869957	21	46132295	1.01031e-78	361.659976916744	COL6A2
rs148337125	0.511975	0.0517792	T	G	0.0250936	21	46132608	6.58385e-23	97.765772661338	COL6A2
rs3952609	-0.118839	0.018224	C	T	0.292943	1	156662148	7.45373e-11	42.5236528325729	HDGF
rs12042999	-0.670648	0.0171229	T	C	0.261888	1	156768636	1e-200	1534.03273378287	HDGF
rs31263	0.120002	0.0182442	G	C	0.281228	5	135633272	5.11692e-11	43.2640647058588	LECT2
rs4272127	-0.183687	0.0174219	A	A	0.336129	5	135867824	8.38532e-26	111.164420746113	LECT2
rs248167	0.708789	0.0152479	A	A	0.367046	5	135956428	1e-200	2160.79649989876	LECT2
rs142743574	-0.459621	0.0776348	C	G	0.011715	5	136237738	3.36121e-09	35.0499053528119	LECT2
rs11126696	-0.324922	0.0168078	A	A	0.384167	2	79096762	3.22404e-81	373.711525760769	REG1B
rs12614387	-0.184541	0.0218256	C	G	0.170248	2	79132617	3.33771e-17	71.4913266335092	REG1B
rs17016642	-0.147681	0.0259579	A	G	0.115694	2	79249249	1.326e-08	32.3675732006516	REG1B
rs942374	-0.356218	0.022472	T	T	0.160613	6	35176115	1.18327e-55	251.274414394065	SCUBE3
rs116735850	-0.759179	0.0644427	C	T	0.016498	17	79041459	9.58332e-32	138.784484501022	ENGASE
rs56107536	0.681166	0.0231459	C	A	0.133509	17	79074958	7.14604e-180	866.07954112114	ENGASE
rs148222910	0.457122	0.0673373	C	A	0.0155275	17	79142808	1.22283e-11	46.0842844972026	ENGASE
rs78418700	-0.276526	0.045811	C	T	0.0343824	17	79157247	1.65577e-09	36.4361430986444	ENGASE
rs2864096	-0.177178	0.0194598	T	C	0.24234	19	51488518	1.10112e-19	82.8977694697259	SIGLEC5
rs7250849	-0.951534	0.0232534	G	T	0.113822	19	51655063	1e-200	1674.46354697639	SIGLEC5
rs12974855	0.461729	0.024216	G	A	0.129558	19	51685899	4.0949e-79	363.554469963657	SIGLEC5
rs8110040	0.220021	0.0277341	G	A	0.0986413	19	51849623	2.45821e-15	62.9361415836436	SIGLEC5
rs58583086	0.502202	0.0163889	A	A	0.37273	4	119635207	5.88298e-194	938.981996122757	PDE5A
rs114110723	-0.242156	0.0409578	T	C	0.0436711	4	119728725	3.52678e-09	34.955637461913	PDE5A
rs143179501	-0.499991	0.0637844	C	A	0.0170525	4	119836365	5.20418e-15	61.4462558314204	PDE5A
rs6600214	0.173731	0.0176289	C	T	0.319077	16	394814	9.08499e-23	97.1190018982032	NME4
rs7202319	-0.255287	0.0358931	A	G	0.0566339	16	439985	1.24997e-12	50.5865966063755	NME4
rs17077267	-0.303925	0.0232302	C	T	0.147026	3	45097023	1.12995e-38	171.169725028011	CDCP1
rs2276862	-0.37749	0.0211676	C	G	0.178705	3	45146293	1.1997e-69	318.029687407726	CDCP1
rs147323157	-0.407921	0.0555246	C	T	0.0229447	22	36002905	2.25501e-13	53.9735830898016	APOL3
rs132631	-1.0582	0.0185308	A	A	0.165742	22	36146146	1e-200	3260.97280322631	APOL3
rs60610441	0.337634	0.0607437	A	T	0.0188548	14	92011188	2.82087e-08	30.8951183994721	ATXN3
rs10140469	-0.630186	0.0177577	A	G	0.245044	14	92067770	1e-200	1259.40111131071	ATXN3
rs72691134	-0.232145	0.0411423	G	A	0.0440871	14	92155806	1.73954e-08	31.8376889217441	ATXN3
rs1465126	0.233942	0.0269558	T	T	0.105573	14	92221563	4.8898e-18	75.3202834950994	ATXN3
rs2838952	-0.30158	0.0537483	C	T	0.0239152	21	45510249	2.08654e-08	31.4829637021113	COL6A1
rs11702503	0.5108	0.0161381	C	G	0.352211	21	45959882	1e-200	1001.83678223267	COL6A1
rs73159613	-0.516879	0.0222512	G	T	0.151671	21	46007063	3.59152e-115	539.598707825739	COL6A1
rs2839098	-0.348791	0.0186058	C	G	0.250451	21	46071056	1.34442e-76	351.425963097562	COL6A1
rs11479	-0.278112	0.0289253	G	A	0.08859	22	50525807	9.34361e-22	92.4450608356923	SCO2
rs1443641	-0.371504	0.016118	A	T	0.443089	18	35110792	1.75672e-113	531.257024487216	MAPRE2
rs4390523	0.13372	0.0203481	C	A	0.208582	14	77221780	5.32462e-11	43.1862017472582	GSTZ1
rs7142812	0.609946	0.0160866	T	C	0.337862	14	77297887	1e-200	1437.65357639005	GSTZ1
rs34174438	0.4876	0.0319205	G	A	0.0695966	14	77525081	7.1886e-52	233.339371051514	GSTZ1
rs114659620	-0.284112	0.0382583	C	T	0.0493553	14	77633323	1.2465e-13	55.147752525545	GSTZ1
rs4880071	0.55508	0.01771	T	T	0.262373	9	136877771	1e-200	982.367614758256	PHPT1
rs117766170	0.355752	0.0339049	G	A	0.0624567	9	18406352	1.42611e-25	110.095549914301	ADAMTSL1
rs13267597	-0.191541	0.0176274	T	G	0.323582	8	119641985	2.71962e-27	118.072016846734	ENPP2
rs79144597	-0.237994	0.0357512	G	T	0.0576043	6	37323009	3.00113e-11	44.3150016098964	MDGA1
rs72857324	-0.383144	0.0576969	C	T	0.0208651	6	37564376	3.35061e-11	44.0980208807908	MDGA1
rs183635273	0.597447	0.0731479	A	G	0.013032	6	37579691	3.68204e-16	66.7106303673383	MDGA1
rs6937280	0.985091	0.011813	T	T	0.475322	6	37704146	1e-200	6953.96170361106	MDGA1
rs9880919	0.154652	0.0195288	G	A	0.239983	3	85412152	2.74936e-15	62.713345056871	CADM2
rs72813607	-0.195295	0.0245913	G	A	0.131568	17	31134507	2.29839e-15	63.0694832984696	OMG
rs9457245	-0.841235	0.0299113	C	T	0.0745182	6	166927227	3.15906e-165	790.977426582313	RNASET2
rs6456141	-0.260467	0.0191144	A	C	0.248024	6	166949107	9.11303e-42	185.688101405921	RNASET2
rs114928388	0.335137	0.0552954	G	A	0.0233606	5	140383553	1.42228e-09	36.7338753006318	CD14
rs5744441	-0.309891	0.0188958	G	A	0.237627	5	140637262	2.2511e-59	268.959791699783	CD14
rs12401997	0.268619	0.0167405	C	A	0.392209	1	156178005	5.8533e-57	257.475912257964	SEMA4A
rs9547187	-0.346282	0.0193512	C	A	0.221475	13	85358375	4.1965e-70	320.216739639042	SLITRK6
rs688445	0.112493	0.0188616	G	G	0.260848	13	85752817	2.57606e-09	35.5708248969482	SLITRK6
rs66624661	0.234095	0.0173647	G	A	0.33405	4	186073978	6.31185e-41	181.739657901911	TLR3
rs34357460	-0.689436	0.0155856	G	A	0.344309	4	186090335	1e-200	1956.77486913366	TLR3
rs7667777	-0.11634	0.0167026	C	G	0.417163	4	186204923	3.56426e-12	48.5165552525008	TLR3
rs6714264	-0.529076	0.0200986	T	C	0.193609	2	119390517	6.69738e-146	692.954164199329	DBI
rs79258303	0.433993	0.0695915	A	C	0.0140718	2	119443461	4.7333e-10	38.8914	DBI
rs9474314	0.313572	0.0272082	T	C	0.104187	6	52737562	1.82498e-30	132.823502844938	GSTA1
rs9395826	-0.645362	0.0149081	C	C	0.47553	6	52814892	1e-200	1873.96806306874	GSTA1
rs1917446	-0.21104	0.0231672	T	T	0.150076	11	103627236	1.05541e-19	82.9817253872658	PDGFD
rs10895596	-0.52836	0.0171323	G	A	0.300846	11	104161315	2.74383e-196	951.105124771398	PDGFD
rs144268268	0.273472	0.0497172	G	A	0.0271732	11	104525727	3.91565e-08	30.2560625920327	PDGFD
rs268695	0.133347	0.0182058	G	T	0.297033	19	40455079	2.66018e-13	53.6471881715427	BLVRB
rs34165679	-0.21329	0.0247316	T	C	0.130251	19	49510136	7.84764e-18	74.3766410181553	IRF3
rs10415576	-0.452409	0.016293	T	C	0.372591	19	49661133	2.61299e-161	771.010614338786	IRF3
rs11672845	0.20032	0.0320971	C	T	0.0725773	19	54570466	4.59227e-10	38.9508583410771	KIR2DL3
rs1654659	0.173444	0.0245953	T	C	0.131637	19	54683871	1.92851e-12	49.7295252377731	KIR2DL3
rs4806594	0.245625	0.0207917	A	G	0.187439	19	54843895	6.52538e-32	139.561341416844	KIR2DL3
rs7339267	0.309996	0.0200156	G	A	0.217455	13	36073931	3.00331e-53	239.869457749333	DCLK1
rs150466875	-0.369582	0.0301824	T	G	0.0811729	1	20651922	3.89563e-34	149.938817639199	DDOST
rs2228203	-0.51625	0.0200114	C	T	0.196659	2	69806452	1.89008e-140	665.526240106803	ANXA4
rs7104596	-0.300296	0.0184656	T	C	0.274643	11	15057506	1.98029e-58	264.467461917642	CALCB
rs4241540	-0.116966	0.0172473	G	C	0.371274	3	19941480	1.28171e-11	45.9914435578737	RAB5A
rs78986913	-0.492879	0.039601	G	A	0.0456121	14	95696081	3.36906e-35	154.906029951358	TCL1A
rs7020874	0.565025	0.0158143	G	A	0.367392	9	92350278	1e-200	1276.54280332797	OGN
rs12858505	-0.16006	0.0201661	G	A	0.218494	13	46124637	2.38419e-15	62.9972790815504	LCP1
rs79692312	1.31192	0.0403629	C	T	0.0385415	1	228224991	1e-200	1056.45251621594	GUK1
rs7533319	-0.150622	0.0207569	A	A	0.196659	1	228451441	4.38763e-13	52.6564812161502	GUK1
rs9471969	-0.185098	0.0190482	G	T	0.250173	6	42938646	3.47788e-22	94.426864219467	CNPY3
rs223507	0.132852	0.0173056	G	A	0.339803	4	102712658	1.84556e-14	58.9335864350131	BDH2
rs78336913	0.356888	0.0212814	C	T	0.174823	4	103190257	5.97227e-62	281.23120104855	BDH2
rs2205771	0.427977	0.0228926	G	A	0.151116	22	29098605	3.36664e-76	349.502768575263	KREMEN1
rs7534754	0.316964	0.017587	G	A	0.304242	1	75719623	4.61335e-71	324.815204803553	ACADM
rs25683	0.344014	0.0164861	A	A	0.418688	6	159775311	6.1277e-94	435.42802167307	ACAT2
rs12969004	-0.165514	0.0168061	G	A	0.420352	18	75208110	9.68214e-23	96.9919257434455	ZADH2
rs28709375	0.260654	0.0184418	A	A	0.277277	1	222649657	9.26418e-45	199.766275404345	AIDA
rs2646236	0.548671	0.0159174	T	G	0.408429	3	87319642	1e-200	1188.17319930005	CHMP2B
rs807060	-0.0984897	0.0167824	G	G	0.430611	1	25914964	4.58885e-09	34.440820796086	STMN1
rs57797651	-0.125478	0.0207362	A	G	0.20061	3	111994785	1.51006e-09	36.6164999977994	ABHD10
rs4880709	0.135515	0.017398	G	G	0.339387	10	5109163	7.69064e-15	60.6702920948891	AKR1C3
rs58339883	0.265989	0.0245065	A	C	0.129974	4	39781456	3.10447e-27	117.805284732261	UBE2K
rs4392019	0.634692	0.0465856	C	T	0.0322335	15	81324218	9.42203e-42	185.619099658906	STARD5
rs28555408	-0.530498	0.0330579	C	T	0.0641897	15	81345531	5.71679e-57	257.523566686578	STARD5
rs3742074	0.143149	0.0224181	C	T	0.168099	12	48063602	1.8151e-10	40.7735976329581	PFKM
rs11256726	-0.745598	0.0429864	T	C	0.0375711	10	6100347	4.65464e-66	300.848130845304	RBM17
rs189407772	-1.01286	0.0578836	A	G	0.0202412	4	99225517	3.56087e-67	306.187723004126	ADH1A
rs1154446	0.125919	0.018054	C	A	0.303688	4	99367790	3.34055e-12	48.6447141625969	ADH1A
rs75207237	0.402321	0.0249045	T	A	0.124289	7	37932788	1.07716e-57	260.969498059471	SFRP4
rs112352450	0.463388	0.0600616	G	A	0.0196867	5	140782616	1.37033e-14	59.5245020986644	HARS
rs13089226	0.272277	0.0406211	C	T	0.0432552	3	149080893	2.19817e-11	44.9281518754194	CP
rs11141212	1.159	0.0627663	G	A	0.0173991	9	86074933	1.99868e-74	340.968151720412	GOLM1
rs10868368	0.340189	0.034908	A	G	0.0607237	9	86085724	2.65121e-22	94.970909833918	GOLM1
rs430948	0.158829	0.0243807	A	A	0.135311	21	41413952	7.78074e-11	42.4392071615371	MX1
rs464783	-0.413879	0.0163459	C	T	0.406835	21	41424553	1.40305e-135	641.104915598428	MX1
rs111486799	-0.365761	0.0203917	G	A	0.197976	1	26251494	2.02979e-70	321.72730847017	SH3BGRL3
rs4501829	-1.16147	0.0292911	C	C	0.070775	1	26315598	1e-200	1572.33336567579	SH3BGRL3
rs6713190	-0.195191	0.01646	T	C	0.484195	2	151302945	3.86036e-32	140.62415192986	NMI
rs79434154	0.183908	0.0229717	A	C	0.155483	10	80009759	1.37283e-15	64.0936450646233	ANXA11
rs2573346	-0.61607	0.015184	G	A	0.438167	10	80158285	1e-200	1646.21946249296	ANXA11
rs2864808	0.20531	0.0231769	G	G	0.1507	12	71746926	1.00895e-18	78.4710587222041	RAB21
rs2822638	0.26387	0.0188482	C	C	0.251213	21	14372785	5.86373e-44	195.992869410469	HSPA13
rs150884181	-0.5299	0.0814599	A	G	0.0106059	11	59843108	8.28676e-11	42.3155601116661	GIF
rs4544900	0.276588	0.0189966	C	T	0.254194	6	24677760	2.365e-47	211.989773884166	ACOT13
rs62125134	0.112996	0.0198151	G	A	0.224387	19	6724433	1.22717e-08	32.5187320181775	TRIP10
rs1054060	-0.152566	0.0211647	T	C	0.18945	19	6752423	6.23111e-13	51.9626493913743	TRIP10
rs8106212	0.561283	0.0700127	C	T	0.0142798	19	6802560	1.25612e-15	64.2702700372902	TRIP10
rs201831100	-0.231856	0.0342279	T	C	0.0648135	19	6804082	1.35263e-11	45.8855740434055	TRIP10
rs9862761	-0.136938	0.0165895	G	T	0.426937	3	134783855	1.79812e-16	68.1367426346588	EPHB1
rs10935143	0.398707	0.0161256	G	A	0.447525	3	134946317	1.27113e-129	611.330347500066	EPHB1
rs3767933	0.10317	0.0164182	T	C	0.493969	1	207464014	3.4947e-10	39.4871489138206	CD46
rs2796270	0.516042	0.0154565	G	G	0.472896	1	207764267	1e-200	1114.67377359519	CD46
rs2796245	-0.244085	0.02345	G	G	0.14363	1	207857507	3.40886e-25	108.341910111338	CD46
rs180365	0.125898	0.0168505	C	T	0.450853	11	116725458	8.8629e-14	55.822859318528	APOA4
rs187929675	-0.589817	0.0648363	C	T	0.0165673	11	117240652	1.18189e-19	82.7557398166573	APOA4
rs2231569	0.822433	0.0405437	G	T	0.0415223	19	36114973	5.1194e-89	411.485273134202	TBCB
rs45471297	-0.686723	0.0724987	C	G	0.0133786	19	36115262	3.63573e-21	89.7227855072412	TBCB
rs11040938	0.229556	0.016762	A	G	0.422432	11	6633382	3.65256e-42	187.553694962417	TPP1
rs9295683	0.23966	0.017152	C	C	0.353182	6	26069267	8.49133e-44	195.236751958346	BTN3A3
rs114803514	-1.0072	0.0739161	C	G	0.0126854	6	26506961	9.16839e-42	185.674962772587	BTN3A3
rs9379945	-0.777001	0.0240959	T	C	0.122279	6	26940052	1e-200	1039.81685082512	BTN3A3
rs2236352	0.312178	0.0186124	T	C	0.252599	14	24141524	5.72232e-62	281.319497544475	PSME2
rs7146672	-0.606768	0.0723321	T	T	0.0128934	14	24145152	5.86047e-17	70.3692932630501	PSME2
rs76946443	-0.405145	0.0298805	G	C	0.0835297	17	2033909	2.25078e-41	183.842216001025	OVCA2
rs145234879	1.40274	0.0681679	C	A	0.0142105	17	2042060	1.77486e-91	423.442585038089	OVCA2
rs114252547	-0.296349	0.0461065	T	G	0.0335505	2	233402625	1.37995e-10	41.312608828808	UGT1A1
rs887829	-0.607257	0.0162861	C	T	0.329821	2	233759924	1e-200	1390.30749884344	UGT1A1
rs9538558	0.199646	0.0199115	T	A	0.225912	13	31143416	1.6577e-23	100.534071301065	HSPH1
rs10876568	0.148809	0.020392	G	C	0.210453	12	54590778	3.24696e-13	53.2523467869114	PPP1R1A
rs4880760	-0.350284	0.047909	C	G	0.0304312	10	1048969	2.92735e-13	53.4572223398885	IDI1
rs56196860	-1.06599	0.0480182	C	A	0.0289755	12	2799164	1.123e-105	492.827018007863	FKBP4
rs145074222	0.51139	0.0760598	C	T	0.0122002	12	2854186	1.90942e-11	45.2057942961283	FKBP4
rs4746970	0.396475	0.0160422	T	C	0.419867	10	70146394	1.62051e-129	610.80665845505	SAR1A
rs11673465	0.140955	0.0207526	T	C	0.203244	19	58527528	1.19274e-11	46.1334508086413	CHMP2A
rs12440453	0.219407	0.0177	C	T	0.317968	15	40399596	6.23287e-35	153.657734523923	IVD
rs72890511	0.260889	0.0306342	T	C	0.0790933	4	107967387	1.98482e-17	72.5267888639017	HADH
rs74662330	-0.70054	0.0368752	C	T	0.0516429	7	101222585	1.44712e-78	360.90849714283	FIS1
rs145582435	0.241463	0.0421012	G	A	0.0402052	2	23680301	1.01279e-08	32.8936627224805	TP53I3
rs1134516	-0.9954	0.0194667	G	A	0.160821	2	24119662	1e-200	2614.6321721565	TP53I3
rs3731626	-0.12266	0.0182595	G	A	0.28109	2	24204995	1.98819e-11	45.1261371043729	TP53I3
rs11884143	-0.134763	0.0216385	C	C	0.180369	2	24490061	4.99173e-10	38.7870756443874	TP53I3
rs5761621	-0.201325	0.0177064	A	G	0.325662	22	26603394	1.05242e-29	129.28105083077	CRYBB1
rs1138891	-0.455336	0.0163977	T	T	0.366699	4	39532402	2.53261e-161	771.077628321237	UGDH
rs7604335	-0.232338	0.0191964	T	C	0.244836	2	230754380	2.13806e-33	146.487616084983	CAB39
rs7207947	0.140266	0.0166362	A	T	0.415777	17	82187415	4.08694e-17	71.0880430603614	DCXR
rs7099650	-0.100384	0.0167265	C	T	0.489741	10	12159177	2.04954e-09	36.0179378450875	NUDT5
rs7415820	0.220126	0.0165674	G	G	0.475461	1	112626827	8.1081e-40	176.536278870851	RHOC
rs7170787	0.359476	0.0187648	G	A	0.250659	15	75593089	7.94577e-80	366.988048565998	SNUPN
rs77237106	-0.183351	0.0220612	C	T	0.173021	15	75676994	1.1235e-16	69.0729973655512	SNUPN
rs148400673	-0.669261	0.041983	A	G	0.0395813	7	74645788	2.97298e-56	254.123072804647	NCF1
rs148581667	0.734063	0.0354647	G	A	0.0551782	7	75044775	1.67955e-92	428.424291939426	NCF1
rs13060373	-0.346945	0.0159757	A	A	0.499445	3	101631980	2.3694e-101	471.630054933144	PCNP
rs2229528	-0.714983	0.0396133	A	G	0.0438791	3	38125604	2.91962e-71	325.768723166983	ACAA1
rs11065640	-0.16696	0.0214829	C	T	0.184597	12	109132145	8.81444e-15	60.4002948082689	MMAB
rs6606724	-0.66167	0.0200712	T	C	0.180092	12	109467374	1e-200	1086.76642208185	MMAB
rs114371775	-0.276876	0.0265871	T	C	0.105296	6	43231992	3.23036e-25	108.449782697922	RCL
rs7581642	0.130405	0.0224445	C	T	0.162623	2	10337292	6.50963e-09	33.7573710182241	HPCAL1
rs34258285	-0.660606	0.049547	A	C	0.028005	16	8813057	4.43159e-40	177.766654955189	PMM2
rs2142316	-0.147208	0.0178079	A	G	0.30854	8	81652967	1.62876e-16	68.334088878025	IMPA1
rs62125238	0.16018	0.0235508	C	T	0.145917	19	17439138	1.11863e-11	46.2599596920541	PGLS
rs73020480	0.4129	0.0199256	G	A	0.202482	19	17518363	1.05676e-92	429.404854843895	PGLS
rs7855984	0.201298	0.0191437	G	A	0.244143	9	98056008	1.12819e-25	110.567416036362	NANS
rs7025781	0.105311	0.0181242	G	A	0.309025	9	98226228	6.49285e-09	33.7621256250304	NANS
rs3799225	0.217967	0.0387458	A	G	0.049286	6	3152008	1.91837e-08	31.6469768136193	BPHL
rs7530481	0.23611	0.0181907	T	T	0.29225	1	220063279	4.25301e-38	168.472856418722	BPNT1
rs185192949	-0.263108	0.0421956	C	T	0.0406211	13	52645515	4.75953e-10	38.8806729621872	SUGT1
rs3743853	-0.326481	0.0223296	G	A	0.158741	16	1827557	9.9033e-48	213.773534139738	FAHD1
rs80260329	-0.184919	0.0259656	C	T	0.113822	10	15155677	1.16904e-12	50.7184937639173	NMT2
rs11259539	-0.227925	0.0166714	T	C	0.402814	10	15197030	5.00113e-42	186.913118523014	NMT2
rs9330298	-0.171167	0.0165494	C	A	0.475184	1	153617778	6.73352e-25	106.973	S100A14
rs1044261	-0.556295	0.0306761	C	T	0.0770137	10	1019770	6.63123e-72	328.859220712529	IDI2
rs7915650	0.209887	0.0242013	C	A	0.139817	10	1103450	5.16175e-18	75.2131347439583	IDI2
rs9729962	0.181925	0.0291697	T	C	0.0878275	1	153596510	4.71927e-10	38.8974240987464	S100A16
rs9729773	-0.319067	0.0160774	A	A	0.482116	1	153622147	2.20961e-85	393.851173572032	S100A16
rs7543790	-0.192875	0.0347087	C	T	0.0616942	1	153697837	2.84308e-08	30.8798500542637	S100A16
rs4660635	-0.45315	0.0162303	G	A	0.367877	1	42439366	5.54649e-163	779.526482571489	PPCS
rs7354966	-0.102708	0.0166759	G	G	0.486344	1	42546161	7.7116e-10	37.934117106059	PPCS
rs76970567	-0.298051	0.0366809	C	G	0.0535838	11	74205493	5.19944e-16	66.0239040061192	PPME1
rs16961516	0.264647	0.0409698	G	A	0.0424234	17	17304918	1.11837e-10	41.7259528273907	NT5M
rs4946366	0.130473	0.0215711	C	T	0.180854	6	118811617	1.53505e-09	36.5844653347261	ASF1A
rs72645633	-0.450127	0.0432664	C	A	0.0381256	1	18925408	3.59532e-25	108.235220440022	AKR7A3
rs72645644	-0.171124	0.0281939	C	T	0.0939969	1	18937833	1.34776e-09	36.8393141729002	AKR7A3
rs55717136	-0.483248	0.0163333	A	T	0.373215	1	19246561	1.12429e-181	875.371197069962	AKR7A3
rs114458471	0.330897	0.0461708	T	A	0.0340358	1	19443436	8.4384e-13	51.3630565630587	AKR7A3
rs116488831	-0.43072	0.0462642	G	T	0.0330653	3	33366277	1.66506e-20	86.676219936407	PDCD6IP
rs150059308	-0.506032	0.0730554	G	A	0.0131013	3	33453499	4.67954e-12	47.9790137575256	PDCD6IP
rs7639200	-0.666061	0.0171039	T	C	0.264592	3	33819317	1e-200	1516.48358152998	PDCD6IP
rs4239148	-0.0959998	0.0175695	G	A	0.338209	17	43077840	4.8105e-08	29.855328343331	VAT1
rs17565019	0.0942912	0.0172722	A	C	0.3554	6	106610517	4.9443e-08	29.802109721261	RTN4IP1
rs2070756	-0.259345	0.0188441	T	T	0.253778	20	57564347	1.46937e-42	189.410896009135	PCK1
rs4523506	-0.358204	0.0162908	G	T	0.459102	1	25566730	9.04308e-104	483.477244870969	LDLRAP1
rs3777083	-0.216131	0.0208396	A	G	0.191876	5	33442018	5.02706e-25	107.561132997133	TARS
rs72737345	-0.474841	0.0578146	A	C	0.0210037	5	33450267	2.5315e-16	67.4561221600903	TARS
rs17595424	0.50593	0.0266514	G	T	0.105435	4	99072718	1.87575e-78	360.363511249613	ADH6
rs28730611	-1.16016	0.0415317	T	C	0.0381949	4	99079107	3.87136e-163	780.326505669114	ADH6
rs2326005	0.118121	0.0166994	G	A	0.451684	2	238008106	1.65429e-12	50.0325335256199	UBE2F
rs7521934	0.234163	0.0165186	T	T	0.493831	1	93939485	5.19106e-45	200.950954461558	GCLM
rs486879	0.21781	0.0206765	C	C	0.195203	1	94012869	9.2418e-26	110.968976018463	GCLM
rs10054775	-0.576491	0.015349	T	T	0.453487	5	157708838	1e-200	1410.66824766538	THG1L
rs566488868	-0.611884	0.0482655	A	G	0.0295993	5	157749582	1.92688e-36	160.718020613348	THG1L
rs13359066	-0.123673	0.0172351	T	T	0.364481	5	157908985	7.91415e-13	51.4899151896734	THG1L
rs3095695	0.123893	0.0211182	T	C	0.193955	5	157972961	4.64401e-09	34.4175333129323	THG1L
rs11575578	0.943428	0.0319229	G	A	0.0639817	9	34656482	2.71483e-181	873.399317316142	IL11RA
rs12999607	-0.320949	0.0518548	T	C	0.02648	2	67924867	6.37072e-10	38.3084099780535	CNRIP1
rs4671908	0.22065	0.0192909	C	T	0.243727	2	68346649	4.89674e-30	130.828657253149	CNRIP1
rs60061601	-0.728116	0.0224286	T	C	0.139609	2	68395186	1e-200	1053.89372302227	CNRIP1
rs12467349	-0.759833	0.0697325	A	G	0.0141411	2	68412293	1.96028e-27	118.731466393252	CNRIP1
rs801460	0.461083	0.0156559	C	T	0.461043	5	140552345	4.01897e-180	867.365498512373	SRA1
rs12336276	0.359664	0.0309725	A	C	0.0779149	9	129001735	6.70837e-31	134.847039667596	SH3GLB2
rs10988177	-0.525745	0.0154993	T	C	0.492375	9	129024421	1e-200	1150.60467256024	SH3GLB2
rs79211223	-0.415762	0.0260328	T	C	0.109109	12	12939849	1.88492e-56	255.063210687348	HEBP1
rs11055175	-1.60774	0.0418909	A	G	0.0338278	12	12968844	1e-200	1472.96440486194	HEBP1
rs1291356	-0.234866	0.0170045	T	T	0.354568	12	13005006	7.55117e-43	190.771093825364	HEBP1
rs116977380	0.884351	0.0432124	C	T	0.0368085	16	2213835	1.58e-90	418.824971322657	PGP
rs62040664	-0.565318	0.0770473	C	T	0.0115763	16	2275108	2.41788e-13	53.8357514415856	PGP
rs76392037	0.57949	0.0366218	A	C	0.0528906	2	64341766	1.81929e-55	250.387427859892	HSPC159
rs1675513	-0.267199	0.0226839	A	G	0.155552	3	98589854	9.74682e-32	138.750388799901	CPOX
rs35687416	-0.653522	0.0387567	G	T	0.0466519	1	47368537	1.33668e-62	284.332721385041	CMPK1
rs117332875	-0.439824	0.0587773	C	G	0.0203106	10	73370976	8.1321e-14	55.9936248277324	ANXA7
rs17097898	-0.460686	0.024394	C	T	0.127825	14	31449817	1.105e-77	356.65144668795	DTD2
rs10135385	-0.972884	0.0808681	T	C	0.0104672	14	31481137	5.07993e-33	144.733026338584	DTD2
rs77004407	0.333523	0.0382597	C	A	0.0500485	14	31646022	3.49286e-18	75.9921	DTD2
rs1617347	0.321812	0.0430864	T	C	0.0384722	17	35959517	9.03097e-14	55.7858495017453	CCL15
rs1734954	1.38857	0.0296152	G	C	0.0638431	17	36010848	1e-200	2198.39747420455	CCL15
rs4878690	0.367175	0.0173003	C	T	0.312838	9	37422659	5.10625e-97	450.44206286828	GRHPR
rs7021678	0.114761	0.0202074	C	T	0.213573	9	37504523	1.40624e-08	32.2528258259639	GRHPR
rs11881893	-0.311165	0.0163912	G	G	0.492306	19	47777295	1.8643e-78	360.379421599748	SEPW1
rs3017096	0.140228	0.0166841	T	T	0.454041	11	62410486	5.11124e-17	70.6421504729036	ASRGL1
rs1878861	0.506623	0.0157481	G	G	0.40628	3	187375904	1e-200	1034.93595892173	RTP4
rs286879	-0.188052	0.0261091	C	G	0.11403	11	34672106	6.50793e-13	51.8766723201469	PDHX
rs2915221	0.335834	0.0173887	C	C	0.316096	11	34892933	4.50712e-81	373.005379053383	PDHX
rs3903687	-0.11506	0.0169469	G	G	0.391169	11	35310095	1.21512e-11	46.096526974294	PDHX
rs11248039	-0.144202	0.0176599	C	C	0.335228	4	772737	3.74774e-16	66.6754702871732	CPLX1
rs34599179	-1.82125	0.0772311	T	C	0.0108831	2	208243577	1.65482e-118	556.102296434332	IDH1
rs3928183	-0.845273	0.0348089	T	T	0.0562873	2	208247493	2.84012e-125	589.675922320855	IDH1
rs1045628	-0.22575	0.0412143	T	C	0.0432552	1	150964427	4.46013e-08	30.0026531944842	PSMB4
rs1887545	-0.705607	0.0197115	A	A	0.181131	1	151412235	1e-200	1281.40499466646	PSMB4
rs191519987	-0.443419	0.0666367	C	T	0.0158741	1	151688522	3.05574e-11	44.2793903765116	PSMB4
rs2277148	-0.390402	0.0196511	G	G	0.215098	9	78297199	1.48868e-85	394.684740995612	PSAT1
rs1204505	0.276776	0.0161617	A	T	0.478164	16	412881	1.78436e-64	293.280221225038	DECR2
rs7935163	-0.0946592	0.0172507	T	C	0.356024	11	110336594	4.22069e-08	30.110101141587	RDX
rs6556884	-0.121341	0.0191124	G	A	0.24844	5	95825636	2.3014e-10	40.307390911457	GLRX
rs138337	0.28252	0.0164284	A	G	0.467559	22	40835049	5.46004e-65	295.738494744702	ST13
rs6601924	-1.0443	0.019441	T	T	0.154998	10	5205339	1e-200	2885.44868686812	AKR1C4
rs2306847	-0.186947	0.0204084	A	A	0.210523	7	138113847	6.63093e-20	83.911036375074	AKR1D1
rs2292889	-0.216182	0.0186154	C	G	0.266394	11	43920227	6.65503e-31	134.863465596051	ALKBH3
rs149547076	0.45401	0.077171	T	C	0.011715	3	57571717	4.2049e-09	34.6116721614765	ARF4
rs141818286	0.242484	0.0372137	A	G	0.0524747	3	57935360	7.70784e-11	42.4580916893164	ARF4
rs79254677	-0.169067	0.0264914	A	G	0.111812	10	102931810	1.85676e-10	40.7293868724685	AS3MT
rs61757207	-1.03263	0.0703066	A	G	0.0140025	16	70324592	3.82172e-48	215.723413536432	DDX19A
rs6867714	-0.6663	0.0161161	T	T	0.3014	5	123046364	1e-200	1709.30561596182	PPIC
rs7715941	0.141183	0.0181151	G	A	0.292735	5	123173258	7.42105e-15	60.7411961989365	PPIC
rs61803286	0.181304	0.0309858	C	T	0.0778456	1	160861601	5.09426e-09	34.2364987784359	ITLN1
rs77048548	0.288005	0.0478267	A	G	0.031263	3	66272112	1.80888e-09	36.2626236854784	LRIG1
rs17774156	-0.618063	0.0171249	A	G	0.284486	3	66350793	1e-200	1302.59498822547	LRIG1
rs138006212	-0.28395	0.0452311	A	G	0.0348676	3	66825044	3.63393e-10	39.4102733001911	LRIG1
rs11024589	-0.578967	0.0261726	A	C	0.104741	11	18256876	5.7678e-105	489.343569186407	SAA2
rs76204461	0.180595	0.031359	C	T	0.0752114	11	18493515	8.81123e-09	33.1655370385198	SAA2
rs77157727	-0.498763	0.0481303	G	A	0.0305005	18	63586727	5.48141e-25	107.386903492224	SERPINB13
rs142302680	-0.470035	0.0710951	G	A	0.0137252	9	33566625	4.08001e-11	43.7100251912136	PRSS3
rs10758233	-0.545144	0.0161053	T	C	0.374601	9	33889794	1e-200	1145.73672745013	PRSS3
rs11506602	-0.122711	0.0167934	A	G	0.404755	9	34129873	3.02237e-13	53.3936641657362	PRSS3
rs2027172	0.227473	0.0388722	C	T	0.0476917	9	131010408	5.07526e-09	34.2437619644188	AIF1L
rs11244283	-0.547309	0.0174698	G	C	0.277901	9	131098141	1e-200	981.497761468257	AIF1L
rs10420796	-0.178236	0.0289912	A	G	0.0900458	19	42569106	8.26821e-10	37.797099177661	CEACAM8
rs719008	-0.449708	0.0163818	G	T	0.390683	12	48022269	6.95531e-158	753.594964653866	COL2A1
rs12423404	-0.141257	0.019828	A	G	0.22203	12	48314785	1.14883e-12	50.7530488675272	COL2A1
rs7200431	0.203281	0.0179653	T	A	0.297934	16	71492891	1.95297e-29	128.033798202154	CHST4
rs10318	0.840389	0.0192587	C	T	0.179537	15	32733778	1e-200	1904.17466389704	GREM1
rs12594918	-0.138028	0.0208353	T	G	0.194579	15	32833282	3.72904e-11	43.8868968811129	GREM1
rs17816447	0.421742	0.0546913	C	T	0.023222	15	32843327	1.41247e-14	59.4644235675401	GREM1
rs3786656	0.122519	0.0182822	C	T	0.282892	19	14395852	2.21769e-11	44.9107156514721	CD97
rs9863263	0.592833	0.0344858	A	A	0.0610703	3	139767054	6.06693e-65	295.518130615502	CLSTN2
rs2114164	-0.182282	0.0166339	A	G	0.438375	3	139884656	1.00054e-27	120.08794071065	CLSTN2
rs7514180	-0.34905	0.0199062	G	A	0.206779	1	77995251	1.92358e-67	307.467033952852	DNAJB4
rs10922556	-0.161393	0.0201694	C	C	0.215791	1	89054960	1.41758e-15	64.0299895307728	GBP2
rs1801257	0.162996	0.0165	C	G	0.488909	16	57655473	7.20074e-23	97.5856602975207	GPR56
rs493972	-0.218772	0.0171653	C	C	0.372591	1	109626266	8.2791e-37	162.435398470821	GSTM4
rs687643	-0.391214	0.0160881	T	C	0.482532	1	109669912	1.32919e-125	591.315498369961	GSTM4
rs11102002	-0.23108	0.0376896	C	T	0.0519895	1	109757655	9.18588e-10	37.5908080280601	GSTM4
rs12860877	0.128073	0.016601	T	C	0.460627	13	96036886	1.3747e-14	59.5177720984488	HS6ST3
rs13212298	-0.10362	0.0189301	T	C	0.260918	6	113921735	4.553e-08	29.9627285355816	HDAC2
rs28479338	0.213411	0.0309825	T	C	0.0768751	15	83071593	6.13152e-12	47.4461180319365	HDGFRP3
rs77552846	0.487345	0.0592227	A	G	0.0201026	20	3183573	2.22095e-16	67.7168305332664	ITPA
rs6051772	-0.668436	0.0184329	C	G	0.214127	20	3348007	1e-200	1315.01991314995	ITPA
rs112845156	0.277694	0.0336448	C	T	0.0650908	20	3438395	1.8105e-16	68.1235216129359	ITPA
rs616749	-0.313258	0.0279679	C	T	0.0981561	20	3661999	7.0044e-29	125.454032479203	ITPA
rs12076610	0.689138	0.0274343	G	T	0.093789	1	103521319	1.47213e-133	630.993127982064	AMY2A
rs114500706	-0.682034	0.0388132	A	G	0.0469985	1	103849546	1.02138e-67	308.782834865733	AMY2A
rs4847148	-0.561542	0.0670638	C	A	0.0154582	1	103907224	6.6708e-17	70.111324714371	AMY2A
rs9901673	0.587568	0.0213561	C	A	0.163108	17	7580783	1.51194e-158	756.95903852221	CD68
rs6833662	-0.0984644	0.0178112	A	G	0.305143	4	19825635	3.3479e-08	30.5613206160583	SLIT2
rs587668	0.156569	0.0181881	C	C	0.297241	4	20189349	8.99961e-18	74.1031874287957	SLIT2
rs6650899	-0.11859	0.0167544	A	G	0.418688	3	44900485	1.59861e-12	50.1000753092874	TGM4
rs13039547	-0.209571	0.0169885	C	C	0.374532	20	38169451	1.29199e-34	152.178150769517	TGM2
rs2245410	-0.426901	0.0160201	A	A	0.442188	6	79616140	2.67177e-149	710.10717178792	SH3BGRL2
rs6923178	-0.182569	0.024741	C	G	0.129558	6	79684023	1.77044e-13	54.4527195786585	SH3BGRL2
rs13158921	-0.464805	0.0649771	C	T	0.0165673	5	159222864	9.30144e-13	51.170649991864	UBLCP1
rs9937599	-0.436248	0.0162186	A	A	0.39609	16	86527683	5.98461e-152	723.502726405866	MTHFSD
rs55700832	-0.231685	0.0205677	A	G	0.203175	18	63959273	3.44157e-29	126.889117269655	SERPINB8
rs1944270	0.131052	0.0183451	G	A	0.289061	18	63979835	9.97179e-13	51.032534681884	SERPINB8
rs3826616	0.428375	0.0160303	A	A	0.425828	18	63987229	4.31668e-150	714.109704058464	SERPINB8
rs57672173	0.211134	0.0192345	C	C	0.238389	17	41837233	8.19296e-28	120.490983308702	NT5C3L
rs11041457	-0.166293	0.0205728	G	A	0.20262	11	7564296	7.34359e-16	65.3372916683792	CYB5R2
rs7942673	-0.503548	0.0159542	T	T	0.408291	11	7663992	1e-200	996.165935553257	CYB5R2
rs80251691	-0.190592	0.0329719	C	A	0.0691113	17	18859663	7.76152e-09	33.4134551646925	PRPSAP2
rs34128802	-0.170039	0.0258122	C	T	0.114723	2	223874212	4.78601e-11	43.3957342998054	SERPINE2
rs6738983	-0.268138	0.0177134	T	T	0.312769	2	223994033	5.52859e-51	229.146311896253	SERPINE2
rs282262	0.50331	0.0156394	G	G	0.454942	2	224050813	1e-200	1035.69276761424	SERPINE2
rs11174314	0.158802	0.0227893	C	T	0.157008	12	62095959	3.49284e-12	48.5567895380975	USP15
rs55905969	0.849766	0.0246139	A	G	0.113268	12	62342020	1e-200	1191.89455948627	USP15
rs117307151	-0.492009	0.0458906	T	A	0.0332039	12	62598879	1.28144e-26	114.947259702395	USP15
rs2130263	0.726173	0.021741	C	G	0.147373	8	81721217	1e-200	1115.63251302231	ZFAND1
rs7842738	-0.164104	0.0166456	G	G	0.452378	8	81741600	8.75488e-23	97.1939932661225	ZFAND1
rs148932286	0.406138	0.0692955	C	G	0.0142105	2	73829050	4.80509e-09	34.3508261253329	STAMBP
rs3213614	-0.839386	0.0178412	A	A	0.217455	11	2952510	1e-200	2213.47855850783	NAP1L4
rs139082408	-0.515221	0.0713983	C	T	0.0135866	11	3204413	5.89344e-13	52.0728526501226	NAP1L4
rs12625681	-0.571736	0.016147	T	G	0.337585	20	18466452	1e-200	1253.73972641099	DTD1
rs73110843	-0.552707	0.0272857	A	G	0.0961458	20	18549100	8.91443e-89	410.317207278151	DTD1
rs12577790	-0.135155	0.0194316	C	A	0.238736	11	108115500	3.82401e-12	48.3779108508273	ACAT1
rs12571531	0.123916	0.0207421	C	G	0.198877	10	73967891	2.42336e-09	35.6902281779788	ADK
rs139820988	0.407219	0.0593871	C	T	0.0198946	9	33148824	7.61271e-12	47.0188312518752	SPINK4
rs830568	0.640289	0.0185676	T	A	0.226189	9	33243066	1e-200	1189.16067396464	SPINK4
rs7607039	-0.251404	0.0187385	A	A	0.258076	2	65096216	1.48013e-40	180.000918206165	RAB1A
rs1549921	-0.194396	0.0166606	A	G	0.425135	5	151758650	3.53682e-31	136.142390959897	ATOX1
rs4820571	0.218832	0.0168016	A	A	0.385762	22	23900786	2.39995e-38	169.636919320248	DDT
rs61805076	0.11505	0.0177447	T	C	0.332247	1	182185855	9.54394e-11	42.0374073631886	GLUL
rs28495024	-0.178251	0.0252809	G	C	0.123458	7	99419060	1.94356e-12	49.7140206490096	PDAP1
rs2229498	-0.50051	0.0220557	G	G	0.157771	10	69097096	3.53067e-110	514.972248794221	SRGN
rs9370842	-0.158922	0.0215701	C	C	0.18633	6	15908411	1.92911e-13	54.2829856854814	GMPR
rs909559	0.171294	0.0207044	C	C	0.198877	6	16071868	1.53793e-16	68.4477226392591	GMPR
rs4716053	0.904946	0.0132929	G	A	0.384722	6	16249603	1e-200	4634.53166906144	GMPR
rs9464899	0.149204	0.0247938	G	A	0.128865	6	16392861	1.85457e-09	36.2138539091662	GMPR
rs2238641	-0.170847	0.016967	T	C	0.386455	19	12895871	1.08157e-23	101.392211259221	GCDH
rs446994	0.0969528	0.0168895	C	C	0.414113	17	7213534	9.82651e-09	32.9524057408168	ACADVL
rs2964584	-0.190465	0.0188935	T	C	0.25052	5	151763317	9.62753e-24	101.62616242379	G3BP1
rs143902781	-0.431259	0.0592326	C	T	0.0196867	16	1510039	3.67049e-13	53.0096272555305	HAGH
rs13166	0.561284	0.0231017	C	G	0.141758	16	1827912	2.11769e-125	590.306336632251	HAGH
rs2551710	-0.174943	0.0173837	T	C	0.328851	8	30699094	1.1458e-23	101.27650424466	GSR
rs143989520	-0.476638	0.0444644	G	C	0.0350062	1	160977761	1.30662e-26	114.908579096312	TSTD1
rs41270009	0.846139	0.0240333	T	C	0.116456	1	161089137	1e-200	1239.52876742724	TSTD1
rs2071387	0.20106	0.0213309	A	G	0.181547	3	139538761	5.63784e-21	88.8450010826322	RBP1
rs10127584	-0.463429	0.0498562	G	A	0.028005	1	44721867	1.90883e-20	86.4028497376332	UROD
rs12126314	-0.734801	0.017544	G	A	0.23423	1	44992009	1e-200	1754.21265617888	UROD
rs35773981	-0.487651	0.0191891	T	C	0.225149	10	69185042	1.6064e-136	645.816335603818	VPS26A
rs61793793	0.225928	0.0371068	G	A	0.0532372	3	132338990	1.1975e-09	37.0708981898206	ACPP
rs6686632	-0.640626	0.0312302	T	C	0.0736864	1	52117939	6.24442e-91	420.784361019864	TXNDC12
rs78806344	-0.460022	0.0676267	G	A	0.0153889	2	19789731	1.11154e-11	46.2722707545036	MATN3
rs6760839	0.646021	0.0155005	C	C	0.366352	2	20056139	1e-200	1737.00815142727	MATN3
rs116697184	0.265166	0.0402528	A	G	0.0443643	2	20415721	4.78725e-11	43.3953788186533	MATN3
rs62125920	-0.58207	0.0196472	A	G	0.199778	19	48803019	3.97145e-182	877.706066842465	BCAT2
rs55650311	-0.175538	0.0224517	C	T	0.162484	16	2251268	6.10796e-15	61.1285129100514	DCI
rs75436557	-0.271599	0.041544	T	G	0.0408984	14	47019389	6.67635e-11	42.7405113705007	MDGA2
rs145891385	0.758481	0.0346071	A	G	0.0584362	14	47374910	3.93075e-103	480.351328921417	MDGA2
rs62104305	0.840317	0.0146166	G	A	0.33911	19	9948235	1e-200	3305.16827056073	OLFM2
rs3745598	-0.162476	0.0168432	A	G	0.423125	19	9998503	6.90082e-22	93.0527529241283	OLFM2
rs233071	-0.124186	0.0172744	C	T	0.366768	1	85340322	7.18005e-13	51.6820026608293	DDAH1
rs6921438	-0.216499	0.0166333	G	A	0.478719	6	43957870	2.67463e-38	169.416204666258	VEGFA
rs34354104	-0.967493	0.0387651	G	A	0.0439484	14	24238273	6.14129e-132	622.893567085058	GMPR2
rs10278152	-0.144709	0.0167251	T	T	0.461666	7	48089060	6.15751e-18	74.8606577296996	UPP1
rs34511054	-0.209217	0.0370949	A	C	0.0542077	5	264041	1.76422e-08	31.8101364080745	PDCD6
rs56075848	0.234281	0.0336805	T	C	0.0649522	5	308237	3.80857e-12	48.3857	PDCD6
rs116699595	0.3465	0.0440477	A	G	0.0359074	1	182951103	4.18025e-15	61.8813821859742	NPL
rs145825209	-0.438323	0.0648916	G	A	0.0167753	2	241675032	1.54289e-11	45.6259116083724	DTYMK
rs145739634	-0.469782	0.054205	C	T	0.0237765	2	241692133	5.42724e-18	75.112816580518	DTYMK
rs142497237	0.595972	0.0398942	C	T	0.0431859	2	241721906	1.01536e-49	223.168	DTYMK
rs61749653	-0.521669	0.0571537	C	T	0.0216276	5	176889558	8.95358e-20	83.3108101260025	HK3
rs60094536	0.741786	0.0199131	C	T	0.173853	1	7987616	1e-200	1387.64864375076	PARK7
rs9434612	-0.239838	0.0410266	C	A	0.0428393	1	8128395	5.25738e-09	34.1747175309092	PARK7
rs61774167	-0.280513	0.0343543	A	G	0.0614169	1	8129546	3.75459e-16	66.6720452803787	PARK7
rs76124527	-0.449741	0.043227	A	G	0.0372245	1	207494204	3.57441e-25	108.246726147965	CR1
rs679515	0.618221	0.0202172	T	T	0.18224	1	207577223	3.32348e-193	935.072945595002	CR1
rs75625374	-0.242062	0.035186	G	C	0.0605851	1	207866086	6.51037e-12	47.3274862298561	CR1
rs2046330	0.180881	0.019264	A	C	0.246846	4	39412241	7.91582e-21	88.1643401624335	KLB
rs2687955	0.619606	0.0166176	C	C	0.298766	4	39455533	1e-200	1390.25551780479	KLB
rs7669821	0.242764	0.0167332	C	C	0.401775	4	39520603	4.9398e-47	210.47986940758	KLB
rs2306029	0.459609	0.016059	T	T	0.450229	11	46871557	9.96729e-171	819.105897030387	LRP4
rs62622406	-0.662224	0.0647393	C	T	0.0165673	7	132198552	2.15446e-24	104.634242336118	PLXNA4
rs744767	-0.124272	0.0195234	T	C	0.236171	7	132330527	2.06889e-10	40.5168497606894	PLXNA4
rs146167147	-0.679734	0.0744112	C	T	0.0125468	3	129451369	8.37119e-20	83.4452020921196	PLXND1
rs3774769	-0.265485	0.0360561	G	A	0.0545543	3	129493428	1.99567e-13	54.2153764269763	PLXND1
rs1108584	-0.554971	0.026273	G	G	0.105365	3	129601458	3.79711e-96	446.191453787244	PLXND1
rs142846687	0.35	0.0514548	G	A	0.0268959	3	129854591	1.11375e-11	46.2683806370974	PLXND1
rs7284984	0.200005	0.0261671	A	C	0.111535	22	25975245	2.39005e-14	58.4212059488229	SEZ6L
rs76688646	-0.137197	0.0249713	G	A	0.124151	22	26268623	4.05907e-08	30.1860943847328	SEZ6L
rs590671	0.188905	0.0167671	C	C	0.410509	22	26355557	3.36758e-29	126.931963229898	SEZ6L
rs738399	-0.166168	0.0169604	A	A	0.37682	22	26369587	1.59612e-22	95.989251299117	SEZ6L
rs17615788	0.203088	0.0166541	C	T	0.429364	8	21957228	7.15962e-34	148.705211596195	DOK2
rs12541385	-0.163966	0.0226696	C	T	0.161445	8	22031395	5.21678e-13	52.3142363050985	DOK2
rs17881517	-0.412712	0.0575797	A	C	0.0209344	10	79559768	8.38566e-13	51.3754214525145	SFTPD
rs528453694	0.238535	0.0299172	C	T	0.0828365	10	79848460	1.78541e-15	63.571481677854	SFTPD
rs4515911	0.521653	0.0162301	T	C	0.344586	10	79994752	1e-200	1033.04925127357	SFTPD
rs12610373	0.167005	0.0173267	A	A	0.362956	19	18287474	7.44118e-22	92.9024646359118	JUND
rs117785973	0.357165	0.0618206	G	A	0.0183003	11	59715368	7.90067e-09	33.3788489778695	TCN1
rs34324219	-0.571434	0.0262174	C	A	0.106405	11	59855905	4.71439e-102	475.064867114563	TCN1
rs146080691	-0.517979	0.0751773	G	A	0.0122002	11	60177545	6.04631e-12	47.4734569796867	TCN1
rs12155117	0.185298	0.0178274	A	A	0.299459	7	33016438	3.97161e-25	108.035241130709	NT5C3A
rs200118999	0.386942	0.0620358	T	G	0.0183003	2	232633721	4.70022e-10	38.9051388681463	EFHD1
rs56292970	-0.458317	0.066585	G	A	0.0155968	9	111251468	6.34507e-12	47.3782619548099	PTGR1
rs144875739	-1.43718	0.055463	G	A	0.0201719	9	111431329	1.25098e-141	671.452995904562	PTGR1
rs73533566	0.291004	0.0482024	G	A	0.0305698	9	111504656	1.64672e-09	36.4468997827741	PTGR1
rs186668635	-0.488295	0.0606186	A	C	0.0189935	9	111536358	9.21577e-16	64.8862612000459	PTGR1
rs7036102	1.12077	0.0373832	A	G	0.0456121	9	111564267	3.24594e-186	898.835147854505	PTGR1
rs112344479	-0.511393	0.0393403	A	G	0.0451962	9	111616359	3.31447e-38	168.979578810292	PTGR1
rs1122291	-0.112634	0.0193977	C	T	0.243796	7	41708910	6.64634e-09	33.7161935666788	INHBA
rs5030062	0.193292	0.0168854	A	C	0.37682	3	186736391	4.41032e-30	131.040352665073	KNG1
rs142316601	-0.336241	0.0614347	G	T	0.0188548	4	186148420	4.56978e-08	29.9553124258643	F11
rs2289252	0.418577	0.0162834	C	T	0.410786	4	186286227	1.6607e-139	660.785552910331	F11
rs62350309	-0.234546	0.0370224	A	G	0.0542077	4	186356512	2.51228e-10	40.1353379412137	F11
rs9983783	-0.302867	0.0206956	C	T	0.197075	21	45481089	8.18209e-48	214.165	COL18A1
rs17004785	-0.261808	0.0273872	G	C	0.102315	21	45512704	1.58665e-21	91.3840832529553	COL18A1
rs77346091	-0.52766	0.0568372	T	C	0.0214197	8	42162640	2.12574e-20	86.1872445726478	PLAT
rs11077399	-0.128605	0.0181444	A	A	0.295647	17	78868093	1.49154e-12	50.2377851740948	TIMP2
rs1035029	-0.227462	0.0167937	G	G	0.398586	9	120980540	2.72399e-41	183.453045292574	C5
rs7214635	-0.214211	0.0190846	G	G	0.249411	17	4697725	5.38529e-29	125.984586099082	CXCL16
rs9890937	-0.11242	0.0173821	G	G	0.361708	17	4757213	1.06103e-10	41.8295000316078	CXCL16
rs12727188	0.370305	0.0290142	T	G	0.0876889	1	159516538	6.61315e-37	162.891323288624	APCS
rs77672383	-0.919614	0.0533996	C	T	0.0237765	1	159608353	3.64514e-65	296.575410880396	APCS
rs10854627	-0.176551	0.0287254	A	G	0.0928878	22	32707932	8.35987e-10	37.7753236278645	TIMP3
rs4821100	0.667653	0.0169107	A	A	0.26785	22	32768474	1e-200	1558.75708084816	TIMP3
rs137490	-0.198711	0.0198235	C	A	0.2291	22	32868600	1.70296e-23	100.480814672828	TIMP3
rs11781875	0.171482	0.0246008	C	T	0.131568	8	21506787	3.43548e-12	48.5890736779745	GFRA2
rs15881	0.359501	0.0163353	A	C	0.460557	8	21693256	6.05568e-104	484.335136015681	GFRA2
rs150868293	-0.285074	0.021666	G	A	0.177943	8	21826786	4.32773e-39	173.124184823564	GFRA2
rs192923146	-0.397662	0.0649279	G	T	0.0167753	8	21897507	9.5642e-10	37.5115899113882	GFRA2
rs10972201	-0.121072	0.0174076	G	A	0.338625	9	34707376	3.83139e-12	48.373736636502	CCL21
rs13117504	0.386073	0.0162638	C	G	0.417787	4	109737700	5.30924e-120	563.501155021304	CFI
rs148562589	1.12319	0.064779	T	C	0.0159434	7	45956826	5.1633e-66	300.633918417735	IGFBP3
rs1723959	-0.141766	0.0231808	C	T	0.154582	7	45980023	1.01182e-09	37.4013545762663	IGFBP3
rs8113877	0.276869	0.0166904	G	G	0.396229	20	46006406	1.112e-60	275.178927792023	MMP9
rs75394768	-0.523014	0.033472	C	A	0.0628726	17	58336274	3.74913e-54	244.153695801136	MPO
rs117981636	0.244041	0.043899	G	C	0.0370165	17	58737704	2.8081e-08	30.9041168484779	MPO
rs6691240	0.121025	0.0207302	G	G	0.206641	1	63704032	5.50888e-09	34.0834225257063	ROR1
rs687640	0.130676	0.0213397	A	T	0.190073	1	63798593	9.62808e-10	37.4985992501683	ROR1
rs4915946	-0.644864	0.0206261	C	G	0.173645	1	64143352	1e-200	977.466827709139	ROR1
rs825186	-0.130853	0.017074	T	T	0.380078	1	64235821	2.04045e-14	58.7349784446069	ROR1
rs1968586	-0.218101	0.017176	C	T	0.365243	8	6421990	1.49006e-36	161.239428743441	ANGPT2
rs3787498	-0.607591	0.0193941	C	T	0.203591	20	23636144	1e-200	981.484404627046	CST3
rs73102389	0.182692	0.022378	C	A	0.165604	20	23655054	3.7976e-16	66.6494425547109	CST3
rs2588323	0.25169	0.0179676	C	C	0.305559	15	41549880	5.23488e-44	196.223844457507	TYRO3
rs3806256	0.101451	0.0165766	C	T	0.488008	1	155063135	9.83984e-10	37.4560303834384	EFNA4
rs2484103	-0.130069	0.0184064	T	C	0.279565	5	107560916	1.7379e-12	49.9355561597734	EFNA5
rs975690	-0.281576	0.0163759	C	G	0.476847	5	107596105	5.68585e-65	295.652063882296	EFNA5
rs2292238	-0.19803	0.0165449	A	C	0.412172	12	56100038	1.0497e-32	143.262881429511	ERBB3
rs13183319	-0.107655	0.0188253	G	A	0.257175	5	55912729	1.11664e-08	32.702774437004	IL6ST
rs13183065	0.654538	0.0245699	G	A	0.119437	5	55977599	3.24311e-149	709.680631083408	IL6ST
rs8178462	-0.406995	0.0587156	C	G	0.0203799	21	33273129	4.52011e-12	48.0475382720611	IL10RB
rs2515717	0.233191	0.0164944	G	A	0.448634	21	33289977	8.79964e-45	199.871340447197	IL10RB
rs375947	-0.2348	0.0175694	A	G	0.317482	19	18069641	2.94394e-40	178.600357641373	IL12RB1
rs4938792	-0.249856	0.0166524	T	C	0.391515	11	111550211	3.91568e-50	225.126125618642	LAYN
rs11595574	0.112574	0.020016	G	A	0.222862	10	17428163	1.93371e-08	31.6316328332218	MRC1
rs147043080	0.250845	0.0196998	C	T	0.227783	10	17803476	9.57092e-37	162.138915388615	MRC1
rs111957681	0.704389	0.0188071	G	G	0.20775	10	17849558	1e-200	1402.75382935122	MRC1
rs200928899	-0.169964	0.0192061	T	C	0.24539	10	17887539	1.09219e-18	78.3132982719589	MRC1
rs61762372	0.305938	0.0167667	G	A	0.399002	17	66302564	9.34709e-73	332.944357383506	PRKCA
rs7091234	0.122863	0.0175831	A	A	0.335297	10	5658432	3.04747e-12	48.8260215893694	GDI2
rs55913768	-0.471464	0.0167435	G	A	0.326078	10	5707486	1.34518e-165	792.874736541499	GDI2
rs6602290	0.173806	0.0219625	A	A	0.173506	10	5855172	2.87115e-15	62.6276304880162	GDI2
rs2302524	-0.415355	0.0216989	T	C	0.162484	19	43652320	1.04874e-79	366.406735838979	PLAUR
rs36229204	-0.473289	0.0428358	C	T	0.0387495	19	43671830	3.72956e-28	122.078464302598	PLAUR
rs1800693	-0.191908	0.0166692	T	C	0.404963	12	6330843	2.0961e-30	132.542953550248	TNFRSF1A
rs28714295	0.450297	0.0243349	G	A	0.128795	15	88027853	1.0062e-74	342.404114958455	NTRK3
rs1948066	-0.174399	0.0180826	C	T	0.308055	15	88047262	7.02346e-22	93.0178355764262	NTRK3
rs387871	-0.167918	0.0164414	G	A	0.494039	16	11958626	2.53448e-24	104.307831106979	TNFRSF17
rs3138190	-0.227633	0.0337274	T	G	0.0655067	12	91171750	1.60177e-11	45.5517134150422	DCN
rs75059484	-0.251438	0.0237542	C	T	0.141619	7	54868647	5.42428e-26	112.042040519437	EGFR
rs73418703	0.660676	0.082398	C	A	0.0103286	7	54990815	1.24377e-15	64.2900436417818	EGFR
rs12718945	0.171695	0.0166156	T	T	0.449605	7	55125270	7.41724e-25	106.778358223717	EGFR
rs5745695	-0.240622	0.0193617	G	G	0.240191	7	81728759	4.21989e-35	154.448498703516	HGF
rs11569479	-0.155755	0.0238405	T	C	0.140025	19	6696783	6.87615e-11	42.6828367378958	C3
rs73045499	-0.216679	0.0218302	T	C	0.172328	19	40718552	4.52575e-23	98.5185964602478	MIA
rs116972110	1.71654	0.0500707	G	T	0.0244004	19	40770150	1e-200	1175.27779319513	MIA
rs117244518	0.936649	0.0458324	C	G	0.0318176	19	40877944	2.76193e-90	417.646213665808	MIA
rs12117083	-0.302963	0.0376485	G	A	0.0503258	1	19921937	9.83498e-16	64.7565689276594	PLA2G2A
rs72661022	0.62944	0.0189592	G	A	0.215098	1	19958722	1e-200	1102.22094780164	PLA2G2A
rs12403363	-0.366814	0.0657608	C	T	0.016498	1	20044754	2.52119e-08	31.1141277006029	PLA2G2A
rs3756074	-0.455359	0.0395815	G	C	0.0461666	4	73982348	2.30642e-30	132.349819240017	PF4
rs9826711	-0.439497	0.05283	G	C	0.0251629	3	93917625	1.0504e-16	69.2070931801758	PROS1
rs7615840	0.148924	0.026698	A	G	0.108346	3	93948926	2.5198e-08	31.1151520568097	PROS1
rs28455688	-0.0960135	0.0171689	A	A	0.360599	19	7878224	2.32291e-08	31.2737284329836	CCL25
rs8112595	-0.296414	0.0165047	G	A	0.425135	19	8027142	1.37542e-70	322.538940244198	CCL25
rs112779148	-1.09848	0.028328	G	T	0.0756967	19	8061132	1e-200	1503.66981184066	CCL25
rs9266828	-0.82096	0.0161937	G	C	0.263344	6	31415165	1e-200	2570.11061793798	MICA
rs3131621	0.378244	0.0171192	A	G	0.327395	6	31457722	9.97465e-105	488.176830957263	MICA
rs41268884	-0.424576	0.0232805	A	G	0.143006	6	31585691	1.10048e-72	332.603086681545	MICA
rs59882870	0.172892	0.022633	G	A	0.156246	7	76009103	2.47259e-14	58.3533172316837	POR
rs17793097	0.270322	0.0273796	A	G	0.102038	8	119453024	7.59555e-23	97.4784434691432	NOV
rs9304718	0.408306	0.0165761	C	C	0.368293	19	51508676	1.05688e-128	606.74584027453	SIGLEC6
rs62116200	1.04112	0.0319946	G	C	0.0632885	19	51514661	1e-200	1058.88356805085	SIGLEC6
rs80003424	-0.146324	0.0235074	G	A	0.14973	19	51579854	5.09893e-10	38.7455593458627	SIGLEC6
rs1868944	-0.110332	0.0196693	G	G	0.232497	19	51777219	2.10581e-08	31.4648142925589	SIGLEC6
rs1039405	0.193705	0.016613	A	A	0.42569	19	51122980	3.88676e-31	135.951978426574	SIGLEC7
rs140185670	-0.812856	0.0315832	G	C	0.0682102	19	51142883	7.96561e-140	662.391835180109	SIGLEC7
rs872723	-0.193114	0.0227008	C	T	0.156384	7	155813050	2.14999e-17	72.3677706771985	SHH
rs11621145	-0.178848	0.0177985	G	G	0.328435	14	105706543	1.33335e-23	100.972095653076	IGHG1 IGHG2 IGHG3 IGHG4 IGK@ IGL@
rs72501730	-0.255101	0.0253913	G	A	0.119645	6	150053632	1.35584e-23	100.937942671818	ULBP3
rs11569479	-0.162316	0.0238344	T	C	0.140025	19	6696783	1.05341e-11	46.3782349354551	C3
rs17875492	0.206585	0.0258181	A	C	0.114862	15	81294745	1.42122e-15	64.0249151794011	IL16
rs11857713	-1.3708	0.0285247	C	T	0.070775	15	81298924	1e-200	2309.43647328429	IL16
rs12905152	-0.160866	0.0221789	C	T	0.168862	15	81363127	4.49777e-13	52.6076037701582	IL16
rs854683	0.116574	0.0206527	G	C	0.204353	17	35986971	1.71959e-08	31.8602899772013	CCL3L1
rs1102934	0.464274	0.0233955	A	G	0.140233	17	36062554	2.25854e-85	393.807573556117	CCL3L1
rs11568819	0.795426	0.0329473	G	A	0.0620408	11	102530902	6.68526e-124	582.854165361723	MMP7
rs12796179	-0.241078	0.019652	T	C	0.235616	11	102559478	2.97122e-34	150.487923214223	MMP7
rs1461993	0.138851	0.0170883	G	A	0.359074	8	107072760	5.19993e-16	66.0237677008798	ANGPT1
rs114322795	0.663465	0.0423294	C	T	0.03972	16	67476655	1.79556e-54	245.669821030785	AGRP
rs74900413	-0.456826	0.0738821	G	A	0.0129627	16	67709521	6.62511e-10	38.2316608357367	AGRP
rs12461127	0.112504	0.0166522	C	T	0.473659	19	44549282	1.52809e-11	45.6449452926308	BCAM
rs28399656	1.51946	0.0764403	T	A	0.011507	19	44813447	1.20751e-85	395.124334833288	BCAM
rs6499080	-0.221214	0.0175812	T	T	0.318383	16	66397516	6.28043e-36	158.317232218331	CDH5
rs62037115	1.11873	0.0814352	G	A	0.0103979	16	57424884	2.05737e-42	188.723609423643	CX3CL1
rs17658212	-0.480648	0.0337008	C	T	0.0620408	15	40853721	1.56005e-45	203.410729923887	SPINT1
rs62115743	-1.05334	0.027856	C	T	0.0824206	19	51011618	1e-200	1429.88017775259	KLK11
rs10410942	-0.796823	0.0320261	T	C	0.0664772	19	51000397	3.63704e-131	619.035580665847	KLK8
rs40239	0.133153	0.0226124	G	G	0.155483	7	116677823	4.07234e-09	34.6743711057079	MET
rs41748	-0.195354	0.016611	T	G	0.444267	7	116806519	1.21187e-31	138.309833898861	MET
rs118088049	-0.719221	0.0662643	C	A	0.0155968	19	38036412	3.10354e-27	117.805479147163	SPINT2
rs139158012	0.538448	0.0575659	C	T	0.0203799	19	38297870	1.10905e-20	87.4897022440498	SPINT2
rs7256575	-0.715538	0.0220326	C	T	0.146194	19	38350165	1e-200	1054.71204458981	SPINT2
rs146784929	-0.453248	0.0492615	C	G	0.0287675	19	38454248	4.57024e-20	84.6557631446616	SPINT2
rs1556580	-0.255506	0.0166141	T	T	0.386178	1	43304250	1.53991e-52	236.509486843402	TIE1
rs2256974	-0.146088	0.0217239	C	A	0.177319	6	31587615	1.89335e-11	45.2223885361474	AIF1
rs3130623	0.200887	0.0213062	C	T	0.187647	6	31629923	5.48811e-21	88.897933896411	AIF1
rs17220750	0.298043	0.0276522	G	A	0.0991266	9	121025721	6.98167e-27	116.171199537745	C5
rs8059619	0.503482	0.0155275	C	C	0.464786	16	29914124	1e-200	1051.3923713297	MAPK3
rs7187832	-0.235124	0.02595	A	A	0.116318	16	30462778	1.64425e-19	82.0954709493951	MAPK3
rs77428206	0.179974	0.0284267	C	A	0.0954527	15	66484142	2.57891e-10	40.0835931941984	MAP2K1
rs4724795	0.151851	0.0182425	G	A	0.290032	7	6338205	1.00776e-16	69.2893684160688	RAC1
rs2401949	-0.261959	0.0184711	A	A	0.275683	16	1296685	4.74837e-45	201.13197989675	UBE2I
rs56361564	-0.249953	0.0211581	G	C	0.189727	14	94627677	6.52919e-32	139.560776271356	SERPINA3
rs35867196	-0.290645	0.0525071	C	A	0.0256481	5	40798506	3.21534e-08	30.6400625174885	C7
rs74480769	-1.50019	0.0423047	A	G	0.0340358	5	40972109	1e-200	1257.52113562777	C7
rs79534924	0.355954	0.049647	T	G	0.0290448	5	40976370	8.26248e-13	51.404570391483	C7
rs112889316	0.4697	0.0672685	C	T	0.0151116	5	40990099	3.15882e-12	48.7548285096383	C7
rs433224	0.40825	0.0168911	C	T	0.336199	5	41267623	3.64607e-124	584.166328711138	C7
rs7710570	0.108661	0.0168285	T	T	0.397061	5	43378715	1.13732e-10	41.6923697671614	CCL28
rs62078115	0.530181	0.0534062	G	A	0.0244697	17	35966583	4.4506e-23	98.5518915443337	CCL14
rs9903158	-1.25462	0.0323074	T	C	0.0585748	17	35985301	1e-200	1508.06616172909	CCL14
rs2293788	-0.734389	0.0363835	G	A	0.052752	17	36001503	3.51858e-88	407.420968533423	CCL14
rs61882743	-0.149262	0.0218198	C	G	0.176626	11	46527204	8.53064e-12	46.794733904359	MDK
rs7225405	-0.673694	0.0495092	G	T	0.0284902	17	35813995	1.1785e-41	185.162715544336	CCL23
rs117639761	0.421391	0.065641	A	C	0.0159434	17	35868176	1.45261e-10	41.2116624752307	CCL23
rs712048	-0.563536	0.0238212	C	A	0.129835	17	35999179	3.17641e-119	559.649421550189	CCL23
rs555642576	0.562764	0.0796559	C	T	0.0110911	17	36059368	1.75717e-12	49.9133498601869	CCL23
rs2227631	-0.185799	0.0167899	A	G	0.410439	7	101126257	3.08949e-28	122.458948333578	SERPINE1
rs35136575	-0.134428	0.0195404	C	G	0.232843	19	44935906	6.51209e-12	47.3273922390837	APOE
rs12091047	0.136891	0.0174814	C	T	0.344933	1	19445431	5.54727e-15	61.319325871374	NBL1
rs3020595	-0.223588	0.0190372	C	G	0.244212	1	19644233	1.45418e-31	137.940195557892	NBL1
rs72984031	-0.196222	0.0187693	A	G	0.252946	19	872089	2.12233e-25	109.294735666816	CFD
rs4866942	0.338674	0.0162371	T	T	0.463053	5	42641860	7.29338e-94	435.05762380816	GHR
rs62372091	-0.180791	0.0279571	T	C	0.0971856	5	42866517	1.06677e-10	41.8185888974721	GHR
rs1799809	-0.231169	0.0167043	G	G	0.430473	2	127418299	5.25207e-43	191.514925763745	PROC
rs193222348	1.25656	0.0487011	C	T	0.0277277	19	50720044	1.73199e-140	665.715885294677	CLEC11A
rs141294855	-0.128724	0.0201487	T	C	0.216207	1	100681309	1.77673e-10	40.8154878865881	VCAM1
rs56339337	-0.157907	0.0234517	A	G	0.145155	9	114798680	1.78632e-11	45.3371384707751	TNFSF15
rs6123685	0.111039	0.0191018	G	A	0.25454	20	57260984	6.39815e-09	33.7911130028966	BMP7
rs10878949	0.163644	0.0226332	A	C	0.163871	12	40643054	5.31711e-13	52.2767103764185	CNTN1
rs11177604	0.289771	0.016737	C	A	0.386732	12	40651583	7.91064e-66	299.746835484565	CNTN1
rs812152	-0.217555	0.0279005	G	C	0.0973936	12	41112051	7.20175e-15	60.801482057592	CNTN1
rs260696	-0.35469	0.0194084	C	T	0.224248	2	108972629	5.68769e-73	333.978430981657	EDAR
rs115793269	1.5456	0.0713484	C	T	0.0126854	2	108986608	7.18705e-101	469.273187830239	EDAR
rs111262200	0.464442	0.0487952	G	A	0.0296687	19	38537190	2.3514e-21	90.595946849742	LGALS4
rs9304578	-0.273497	0.0161829	G	A	0.471995	19	38759697	7.16763e-63	285.622510997235	LGALS4
rs74451052	-0.240792	0.0322064	A	G	0.0695966	4	73720891	8.53294e-14	55.8984470800231	CXCL1
rs3111697	0.58062	0.0180264	C	T	0.241439	4	73880088	1e-200	1037.44713451913	CXCL1
rs114862057	0.385422	0.0562594	C	T	0.0214197	4	74102925	7.94965e-12	46.9334855983208	CXCL1
rs2287047	-0.230468	0.0179302	G	A	0.299875	2	102157594	2.10963e-37	165.215579615884	IL1R1
rs3827278	0.848015	0.0171434	C	A	0.229724	22	17115025	1e-200	2446.88270685162	IL17RA
rs5748923	-0.210818	0.0174643	T	G	0.331346	22	17166972	3.1228e-33	145.717936226162	IL17RA
rs3788277	-0.299611	0.0422852	C	G	0.0398586	22	17198659	1.51669e-12	50.2040473080713	IL17RA
rs4851010	0.290845	0.0180882	A	T	0.295577	2	102439667	3.48923e-57	258.542831969721	IL18RAP
rs1960510	0.332749	0.0163469	T	T	0.399626	2	102205805	1.31977e-89	414.345575962271	IL1RL2
rs655627	-0.215657	0.016636	G	G	0.446832	11	134151964	5.24279e-38	168.046431867673	JAM3
rs1835674	-0.348407	0.0214725	T	T	0.176071	3	116319644	3.52783e-58	263.274333037539	LSAMP
rs12573118	-0.657848	0.0148396	G	G	0.423679	10	52743332	1e-200	1965.19987523016	MBL2
rs2204344	-0.201501	0.0226479	C	C	0.161167	10	52912424	7.15123e-19	79.1586782586982	MBL2
rs986475	-0.620455	0.0275093	A	G	0.0927492	6	31588932	6.6358e-109	508.699719829248	NCR3
rs2734331	-0.460543	0.0405793	A	G	0.0431166	6	31962574	1.33309e-29	128.804569104725	NCR3
rs7029402	0.635029	0.0163443	T	C	0.301054	9	5505822	1e-200	1509.57420842481	PDCD1LG2
rs7854413	-0.356581	0.0282791	T	C	0.0930958	9	5557708	4.49569e-36	158.995645368083	PDCD1LG2
rs6477000	0.134197	0.0171445	T	G	0.36968	9	5761493	5.69229e-15	61.2683192345262	PDCD1LG2
rs73051038	-0.193461	0.0344215	G	C	0.0620408	19	51083701	1.97692e-08	31.5883741180019	SIGLEC9
rs2691249	0.71832	0.0145057	A	A	0.477125	19	51104817	1e-200	2452.21494220019	SIGLEC9
rs2280806	0.126085	0.0191794	A	G	0.247816	19	51129600	5.24166e-11	43.2172185163746	SIGLEC9
rs75735322	-0.362197	0.0597227	C	T	0.0196867	1	91587247	1.38921e-09	36.7799242683362	TGFBR3
rs79859654	0.189129	0.0201309	A	G	0.214405	1	91620183	7.52489e-21	88.2652731551858	TGFBR3
rs2799526	-0.23211	0.030533	G	G	0.0784001	1	91854020	3.28631e-14	57.7894748233727	TGFBR3
rs11078596	-0.349685	0.0212753	C	T	0.183211	17	1714968	1.26748e-59	270.148537777997	SERPINF2
rs308403	-0.221641	0.0175047	C	T	0.327672	4	122836593	2.34177e-36	160.321164107787	FGF2
rs143322202	-0.299969	0.0540244	T	C	0.0242617	17	35525271	2.91692e-08	30.8299518234002	CCL23
rs190841909	0.428933	0.0763215	C	T	0.0119922	17	35660631	1.98001e-08	31.5853086731628	CCL23
rs7225405	-0.736889	0.0493842	G	T	0.0284902	17	35813995	1.30578e-49	222.652769516501	CCL23
rs861273	-0.698485	0.0198071	A	G	0.186538	17	36019161	1e-200	1243.57613679651	CCL23
rs2335525	-0.399727	0.0185423	A	G	0.250659	19	7720827	6.09047e-100	464.728986580495	CD209
rs4804804	-0.178118	0.0170688	G	A	0.357826	19	7748977	2.58999e-25	108.895426616232	CD209
rs2235338	0.290398	0.0165779	G	G	0.412796	22	37569873	2.58988e-67	306.851471899531	LGALS2
rs5995489	-0.091607	0.0166026	A	A	0.432622	22	37636908	3.55497e-08	30.4442382658943	LGALS2
rs6827617	0.192949	0.0169386	G	G	0.390683	4	75994993	8.31923e-30	129.756773925256	CXCL11
rs62078244	0.417909	0.0554984	G	A	0.022806	17	35934014	5.68602e-14	56.7025411921621	CCL3
rs2015086	0.609656	0.0230465	A	G	0.138639	17	36064257	2.96594e-147	699.777130361167	CCL3
rs145495890	0.330333	0.040253	C	T	0.0431859	17	62499184	2.67612e-16	67.3453193245787	MRC2
rs146385050	-0.414284	0.0205227	C	A	0.196382	17	62559897	3.38612e-88	407.499732716771	MRC2
rs2460290	0.732544	0.0670185	T	T	0.0156662	17	62691485	1.35559e-27	119.475271073423	MRC2
rs13182103	-0.105409	0.0170322	A	G	0.380563	5	151672199	6.39276e-10	38.3013331112649	SPARC
rs59311424	-0.386049	0.0477169	G	A	0.0311244	5	152030389	6.92479e-16	65.454637348597	SPARC
rs854682	0.172849	0.0206069	T	A	0.204353	17	35987298	5.89583e-17	70.357178604395	CCL18
rs972317	0.791886	0.024509	T	G	0.115278	17	36044622	1e-200	1043.93665368239	CCL18
rs146185601	0.812412	0.0805699	C	G	0.0104672	17	36105990	9.40403e-24	101.673321180187	CCL18
rs322329	0.293789	0.0165828	C	C	0.420421	7	137333710	8.83179e-69	313.873995757928	PTN
rs2882591	0.109415	0.0174599	T	C	0.348884	7	137413339	3.90155e-10	39.2708431197063	PTN
rs117761837	-0.464557	0.0685231	C	T	0.014973	19	7643172	1.30065e-11	45.9625390964784	RETN
rs34124816	-0.748559	0.0493745	A	C	0.0286289	19	7668790	3.92279e-51	229.851134245734	RETN
rs56092812	0.193832	0.0310423	C	T	0.0786081	7	142901703	4.50351e-10	38.989096417207	PRSS1
rs112791888	-0.286696	0.0247578	C	G	0.128449	16	71828759	9.71888e-31	134.097032373574	HP
rs77303550	0.680945	0.019634	C	T	0.190836	16	72045758	1e-200	1202.83622040756	HP
rs212177	-0.351813	0.0631802	C	C	0.0173298	16	72544485	2.6634e-08	31.0071445415764	HP
rs374039502	0.345389	0.0526957	T	A	0.0250936	13	108308037	5.97124e-11	42.9602349644279	TNFSF13B
rs835210	0.408037	0.0458495	T	C	0.0331346	5	39350369	6.99997e-19	79.2008575250799	C9
rs696766	0.463091	0.0360227	A	A	0.0549009	5	39356024	2.05762e-37	165.264722576514	C9
rs75464260	-0.497036	0.0794728	C	T	0.0111604	14	55049687	4.22467e-10	39.1145791842927	LGALS3
rs118083722	-0.80857	0.027847	G	A	0.0865105	14	55129494	2.09235e-175	843.098696987746	LGALS3
rs17884883	0.10036	0.0167364	T	T	0.401983	11	72097010	2.11331e-09	35.9581393717275	IL18BP
rs2232587	1.40893	0.0802642	T	C	0.0105365	20	38354467	1.39927e-67	308.130770769515	LBP
rs6025169	0.456615	0.0357518	G	A	0.0559407	20	38361813	5.91388e-37	163.118990098269	LBP
rs2232613	-1.21273	0.0271417	C	T	0.0797172	20	38369011	1e-200	1996.43029012596	LBP
rs150091761	0.328963	0.0563718	C	A	0.0219742	20	38385086	5.59197e-09	34.0541702005064	LBP
rs547138	-0.2812	0.0166703	T	T	0.396229	13	113137856	1.20874e-62	284.540310901953	F10
rs2480948	-0.222957	0.0210461	T	C	0.18737	13	113163223	4.9455e-26	112.227416368706	F10
rs3735167	0.50049	0.0181808	C	T	0.262928	7	150342466	1.02427e-158	757.81784952513	RARRES2
rs10001755	-0.350216	0.0606466	A	T	0.0190628	4	176811946	8.02976e-09	33.3471751307725	VEGFC
rs112782083	1.07707	0.0789183	G	C	0.0110911	4	176834019	6.8596e-42	186.265497259449	VEGFC
rs73053728	-0.148931	0.0178135	A	G	0.305698	12	6787380	7.42088e-17	69.8991178697058	CD4
rs1893319	0.113199	0.0172653	C	T	0.370927	4	74107412	5.89058e-11	42.9869787404327	CXCL2
rs12722497	0.228191	0.028402	C	A	0.0954527	10	6053965	1.09087e-15	64.5504355451799	IL2RA
rs5745987	0.388178	0.0581111	T	G	0.0202412	1	12180665	2.56863e-11	44.6214463614712	TNFRSF1B
rs519064	-0.746031	0.0452391	C	T	0.0334812	1	12182039	5.30426e-60	271.947978991966	TNFRSF1B
rs73053016	0.174023	0.0291027	C	T	0.0901844	19	51109079	2.34354e-09	35.7558196039814	CD33
rs2455069	0.592768	0.0153134	A	G	0.426036	19	51225385	1e-200	1498.39476689316	CD33
rs62115998	-0.946788	0.0506883	G	C	0.026272	19	51258337	4.51325e-76	348.891217918527	CD33
rs17716134	-0.606322	0.0623615	C	T	0.0179537	19	51281892	3.30153e-22	94.530846630903	CD33
rs34140285	-0.13518	0.0188439	C	T	0.258838	19	51382216	8.02823e-13	51.4616020931609	CD33
rs80176691	0.4799	0.0605234	T	C	0.0190628	21	26852957	2.53919e-15	62.8716510569486	ADAMTS5
rs2830585	-0.912609	0.0198583	C	T	0.160959	21	26932893	1e-200	2111.95840332647	ADAMTS5
rs2027708	0.179739	0.0292709	G	A	0.0895605	21	27105407	8.66081e-10	37.7061759888874	ADAMTS5
rs11248043	0.157042	0.0202955	G	A	0.209829	4	818965	1.1493e-14	59.8731524097015	IDUA
rs4690220	0.497824	0.0157199	A	G	0.457161	4	986676	1e-200	1002.88723155956	IDUA
rs748651	0.328996	0.0162195	T	C	0.462984	4	1017327	5.23685e-89	411.439810599281	IDUA
rs455047	0.16472	0.0166338	G	C	0.441772	21	26151670	5.6768e-23	98.0640254063898	APP
rs11743362	-0.262654	0.0165591	G	A	0.436434	5	78880898	1.0149e-55	251.590698323426	ARSB
rs6877621	0.154734	0.0182548	G	A	0.286913	5	79018556	2.78971e-17	71.8484406194495	ARSB
rs2175829	-0.602079	0.016953	T	C	0.293706	4	75907281	1e-200	1261.28675534115	NAAA
rs4241590	-0.219015	0.0169686	C	T	0.354014	4	76147281	1.07164e-37	166.59259594045	NAAA
rs2034004	-0.103709	0.0172578	C	T	0.380563	4	76223529	1.95224e-09	36.1128721193213	NAAA
rs7047076	0.306739	0.0325536	A	T	0.0689727	9	133249942	5.80603e-21	88.7850715793216	ADAMTS13
rs2285485	-0.851057	0.027205	A	G	0.0913628	9	133412261	1e-200	978.632953908565	ADAMTS13
rs4962150	-0.166753	0.0167023	A	G	0.418896	9	133446270	2.54093e-23	99.6769525555366	ADAMTS13
rs191805	0.22453	0.0170547	T	T	0.367947	20	45880903	3.92051e-39	173.324750607499	CTSA
rs56228576	0.357149	0.0484791	C	G	0.0299459	1	150558072	1.93792e-13	54.2737437153024	CTSS
rs41310885	-1.05105	0.0322604	T	A	0.062526	1	151002495	1e-200	1061.46885824786	CTSS
rs140086081	0.30806	0.0538905	C	T	0.024539	1	151150778	1.1315e-08	32.6773023210647	CTSS
rs11188480	0.161665	0.0176497	T	C	0.336406	10	95774019	6.67255e-20	83.8991106871294	ENTPD1
rs117926700	-0.650103	0.0612112	A	T	0.0189242	13	112991459	3.72537e-26	112.798299672809	F7
rs117989138	0.557358	0.0617262	G	A	0.018231	13	113043357	2.17956e-19	81.5322438867268	F7
rs112944884	-0.475444	0.0756505	C	T	0.0122002	13	113101528	3.47495e-10	39.4980028302343	F7
rs776905	-1.18304	0.0241027	A	C	0.0992652	13	113127628	1e-200	2409.17	F7
rs3131623	0.152797	0.0228689	T	A	0.154027	6	31451033	2.54209e-11	44.6415334158948	C2
rs115978492	-0.333799	0.0375047	C	A	0.051019	6	31609086	6.95671e-19	79.2134029700473	C2
rs9268149	-0.338792	0.0213978	T	T	0.178497	6	32295322	1.5761e-55	250.684825167751	C2
rs55798945	0.170856	0.0185579	T	G	0.275406	16	619708	4.33351e-20	84.762314889061	WFIKKN1
rs8099942	-0.891725	0.0189148	C	C	0.183488	19	55022110	1e-200	2222.5849943751	GP6
rs73059038	0.593548	0.0263755	T	C	0.103563	19	55053377	1.92953e-108	506.419347442663	GP6
rs12981737	-0.300433	0.0503412	C	T	0.0279357	19	55115264	2.51646e-09	35.6162459302742	GP6
rs181562580	0.381535	0.0597718	G	A	0.0193401	2	85404517	1.84176e-10	40.7451666819681	GNLY
rs11890975	0.677737	0.0198368	T	A	0.18633	2	85690467	1e-200	1167.29106838234	GNLY
rs6886442	-0.172545	0.0191431	C	C	0.249064	5	83677391	2.52028e-19	81.2419280556799	HAPLN1
rs2247570	0.154682	0.0179083	T	C	0.312422	12	96028599	6.99756e-18	74.6054982886481	LTA4H
rs114758648	0.490929	0.0410168	G	A	0.0426314	11	10593808	1.0528e-32	143.256331163903	LYVE1
rs10840449	-0.123578	0.0166577	C	G	0.446693	11	10630492	1.31826e-13	55.0366830433169	LYVE1
rs34873421	-0.36057	0.0592346	G	C	0.0200333	11	10648648	1.20826e-09	37.0534166226656	LYVE1
rs6822589	0.122328	0.0169662	A	A	0.38902	4	98980016	6.15998e-13	51.985543182913	METAP1
rs552986493	-0.317646	0.0170854	A	G	0.350201	10	50134341	2.12775e-75	345.649935237929	ASAH2
rs201395210	-0.447907	0.0251726	A	G	0.117288	10	50218730	2.37584e-69	316.606298165738	ASAH2
rs2842127	-0.63504	0.0190309	A	A	0.207334	10	50262041	1e-200	1113.48278931933	ASAH2
rs2734807	-0.226066	0.0166358	T	T	0.397962	1	236098248	1.50476e-41	184.664374343091	NID1
rs6540730	-0.205398	0.0165742	T	C	0.465063	1	206945992	6.48652e-35	153.577385768263	PIGR
rs144670775	0.404297	0.0435894	G	A	0.0372938	10	42839564	2.30215e-20	86.0278868778436	RET
rs2506008	-0.509789	0.0182252	C	C	0.254263	10	43084776	1.5107e-163	782.413462854569	RET
rs62642270	-0.175349	0.0221304	A	G	0.170595	8	41140689	2.65731e-15	62.7809754922795	SFRP1
rs147918758	-0.209407	0.0167765	C	G	0.392139	8	41310043	2.16427e-35	155.80438189475	SFRP1
rs2305799	-0.444933	0.0247267	C	T	0.122279	19	11576536	7.55826e-71	323.785142419416	ACP5
rs33949590	0.270819	0.0286283	C	T	0.0893526	19	11780106	4.08755e-21	89.4884819740444	ACP5
rs9870933	0.147132	0.0170478	A	A	0.372799	3	112653470	7.42893e-18	74.4865043852196	CCDC80
rs11079936	0.706933	0.0157228	T	T	0.329683	17	50830473	1e-200	2021.60698892981	WFIKKN2
rs12594617	0.189913	0.0207819	C	G	0.19756	15	88715387	8.10418e-20	83.5100775662624	ACAN
rs34949187	-0.219758	0.0216866	G	A	0.172397	15	88843421	5.68378e-24	102.684868096148	ACAN
rs2073511	0.564432	0.0174873	T	C	0.272979	5	136048204	1e-200	1041.7841228972	TGFBI
rs746994	0.295512	0.0199671	G	A	0.216692	5	136147324	7.59343e-49	219.038398969225	TGFBI
rs765621	0.15665	0.0239302	A	T	0.140164	5	136417971	6.30925e-11	42.8517084876374	TGFBI
rs146071223	-0.464415	0.0675655	C	T	0.014973	6	73502326	6.78594e-12	47.2457216428895	CD109
rs4706559	0.572999	0.0164383	A	T	0.327118	6	73866945	1e-200	1215.04936808103	CD109
rs3005503	0.164777	0.0181879	C	T	0.309927	6	73875709	1.65912e-19	82.0782461497953	CD109
rs62110713	-0.364279	0.0191969	C	T	0.241924	19	7689659	2.14051e-78	360.08585883575	FCER2
rs150301323	0.372263	0.0662618	T	A	0.0159434	19	7728748	2.00309e-08	31.5626374859117	FCER2
rs352684	-0.353888	0.0163453	A	A	0.423679	1	160711985	9.16544e-101	468.754965032044	CD48
rs35304526	-0.375044	0.052914	G	A	0.0253015	1	160712795	1.49179e-12	50.2369492391554	CD48
rs12565518	-0.234067	0.0378037	T	C	0.0503951	1	157692347	6.28073e-10	38.3364382965579	CD5L
rs2765501	0.376988	0.0164016	G	A	0.420144	1	157834858	6.97797e-113	528.302444524305	CD5L
rs6663231	-0.271235	0.0311929	T	C	0.077291	1	204977540	4.23004e-18	75.6101246333736	CNTN2
rs72755535	0.444851	0.0328246	G	A	0.0677249	1	205007763	2.45312e-41	183.666629975195	CNTN2
rs149866019	0.486253	0.0506208	C	T	0.0275198	1	205143238	1.01913e-21	92.2712871315713	CNTN2
rs138619004	-0.370954	0.0649131	G	A	0.016498	1	205163297	1.14326e-08	32.6569346495388	CNTN2
rs1172141	0.756809	0.0234885	C	C	0.126577	1	205243140	1e-200	1038.15454543571	CNTN2
rs12490123	0.401915	0.0449459	T	C	0.0356301	3	2080171	4.78091e-19	79.9628505225302	CNTN4
rs13071423	0.370997	0.0209993	C	A	0.181201	3	2098694	2.04677e-68	312.126871623772	CNTN4
rs112526457	-0.225988	0.0235043	T	G	0.144877	3	2254885	9.35104e-22	92.4434433948585	CNTN4
rs1178537	0.227697	0.0406149	A	A	0.0447109	3	2334075	2.14391e-08	31.4299609006163	CNTN4
rs7109365	-0.129656	0.0207994	C	C	0.197629	11	99125224	4.81432e-10	38.8582845432536	CNTN5
rs4528296	0.731417	0.0309376	C	C	0.0718148	11	99222947	4.44613e-119	558.929279029385	CNTN5
rs181469023	-0.529701	0.0726196	C	T	0.0129627	11	99300634	3.32489e-13	53.2051755891725	CNTN5
rs4462848	-0.561801	0.0186981	C	C	0.226189	20	24922814	5.66787e-187	902.755326533664	CST7
rs140988383	0.972099	0.0576144	A	G	0.0206571	20	25003777	1.12989e-62	284.681277335354	CST7
rs117454282	0.375018	0.0578036	C	T	0.0200333	15	40847504	9.28639e-11	42.0915048244892	DLL4
rs72714918	-0.363543	0.0506458	C	T	0.0276584	1	161204580	7.77163e-13	51.5257951097226	FCGR2A
rs61802089	0.160076	0.0172071	G	A	0.351518	1	161381320	1.77839e-20	86.5440234620923	FCGR2A
rs11811241	0.566468	0.0164575	A	G	0.338417	1	161523790	1e-200	1184.7399554637	FCGR2A
rs1771576	-0.122392	0.0178311	A	C	0.324899	1	161647576	7.25372e-12	47.1139798666154	FCGR2A
rs10917688	0.279532	0.0196477	C	T	0.218494	1	161688990	2.54048e-45	202.413571122962	FCGR2A
rs11799744	-0.334256	0.0362308	T	C	0.0562873	1	161428624	3.63334e-20	85.1143087008212	FCGR2B
rs115264949	0.779797	0.0759138	G	A	0.0118536	1	161532142	1.38905e-24	105.51681105225	FCGR2B
rs72700095	0.956422	0.0161145	T	T	0.228546	1	161597399	1e-200	3522.61715021145	FCGR2B
rs16827592	-0.22874	0.0310796	T	G	0.0751421	1	161649251	2.04547e-13	54.166826501737	FCGR2B
rs10800573	0.462213	0.0169506	A	G	0.32483	1	161538134	6.58358e-156	743.556819573827	FCGR3B
rs11578979	0.128756	0.0192483	G	A	0.249896	1	161688868	2.4121e-11	44.7455854417336	FCGR3B
rs57136797	-0.723795	0.0221636	A	T	0.143283	9	134860694	1e-200	1066.47468288327	FCN2
rs11103557	0.405727	0.0311961	C	A	0.0761819	9	134864975	3.04986e-38	169.148134293042	FCN2
rs10885876	0.339095	0.0178832	C	G	0.290864	10	116202766	2.77302e-78	359.544214661549	GFRA1
rs73160986	0.150383	0.0262143	T	C	0.11202	22	20752297	1.00467e-08	32.9094753092807	SERPIND1
rs881382	0.160197	0.0184523	G	T	0.278802	4	57051180	4.76585e-18	75.3716016258818	IGFBP7
rs1718860	0.529674	0.0181789	G	G	0.256412	4	57083351	1.52063e-176	848.94999356367	IGFBP7
rs140704863	0.625784	0.0636123	C	A	0.0169139	12	58752217	1.07821e-22	96.7757872733117	LRIG3
rs142216336	0.408782	0.0530151	C	T	0.0251629	12	58785207	1.41946e-14	59.4544	LRIG3
rs61096689	0.363592	0.0554889	T	C	0.0222515	12	58873782	6.04722e-11	42.935488349684	LRIG3
rs11172791	-0.846134	0.0389619	T	C	0.0444337	12	58879191	2.37505e-101	471.626325083098	LRIG3
rs61921897	0.419877	0.066518	A	G	0.0159434	12	58898770	2.9135e-10	39.8442636784922	LRIG3
rs61936480	0.611805	0.0495226	G	A	0.0287675	12	59282990	1.03773e-34	152.622712790053	LRIG3
rs7542607	0.255027	0.0166331	A	G	0.418827	1	53270941	3.07428e-52	235.085545649225	LRP8
rs4926974	0.128579	0.0206575	G	A	0.205393	1	53348560	5.10784e-10	38.7422255096722	LRP8
rs4656932	0.600033	0.0187695	G	A	0.217663	1	160809705	1e-200	1021.98580723869	LY9
rs11577230	-0.163679	0.0260608	C	T	0.115555	1	161083854	3.56712e-10	39.4466784058915	LY9
rs12721035	-0.208036	0.0355306	C	T	0.0576736	1	161221549	4.97595e-09	34.2824543819803	LY9
rs17831160	0.566124	0.0446356	G	A	0.0344517	8	98033638	1.79223e-36	160.864561357963	MATN2
rs28522929	0.238337	0.020007	C	T	0.22099	8	98052385	2.04395e-32	141.911958167568	MATN2
rs17564430	0.292195	0.0187274	T	G	0.253015	11	115172854	5.3059e-54	243.439241794542	CADM1
rs17288108	-0.372722	0.0213431	A	G	0.176002	12	95738117	6.39835e-67	304.968551681475	NTN4
rs9919756	-0.126322	0.0166724	T	G	0.469153	12	95786367	3.98679e-14	57.4065891358084	NTN4
rs7486703	0.111731	0.0167571	A	A	0.435741	12	95944219	2.79042e-11	44.4579720782884	NTN4
rs2072563	-0.213745	0.0178008	G	A	0.316235	19	46023390	6.66427e-33	144.182611450414	PGLYRP1
rs2368553	-0.339456	0.0161518	C	C	0.452655	5	98446049	3.17047e-95	441.698	RGMB
rs25743	0.164289	0.0210077	G	A	0.196243	5	98622050	6.01323e-15	61.1589412546137	RGMB
rs116011690	-0.557414	0.0566753	C	T	0.0219742	2	187459732	1.10227e-22	96.7315371543023	TFPI
rs9346611	-0.166611	0.0218211	C	T	0.175794	6	169070944	2.54261e-14	58.2980546413921	THBS2
rs1556454	-0.393212	0.04513	G	A	0.0354915	6	169158880	3.63231e-18	75.9141719421094	THBS2
rs78109196	0.944425	0.0255813	C	A	0.0982254	6	169224606	1e-200	1362.9807682969	THBS2
rs10945406	-0.200198	0.0366803	A	C	0.0530293	6	169238696	4.97751e-08	29.7888481776045	THBS2
rs2451934	0.176576	0.0193015	T	A	0.244143	5	79902130	7.4025e-20	83.6914758818777	THBS4
rs2404710	0.211661	0.0165669	C	A	0.433731	5	79960739	5.59744e-37	163.229701219958	THBS4
rs13167730	0.654834	0.0277116	G	T	0.0934424	5	80074424	5.70237e-119	558.392064724276	THBS4
rs148804382	-0.679851	0.0739927	C	A	0.0125468	3	52078217	5.13997e-20	84.4208520801315	ACY1
rs1126931	-0.198104	0.0220545	C	T	0.16907	8	22164420	3.33053e-19	80.6848612901179	BMP1
rs76276645	0.313293	0.0500182	G	T	0.028005	1	8518037	3.97823e-10	39.2324351286856	CA6
rs114865645	0.454584	0.0644556	A	G	0.0167059	1	8711314	1.91818e-12	49.7401373982922	CA6
rs12138897	0.49937	0.0155353	C	G	0.47761	1	8971844	1e-200	1033.25046158924	CA6
rs34933034	0.489076	0.0215858	G	A	0.164564	15	74787133	7.52928e-110	513.353355937276	CSK
rs4743059	0.390775	0.0311744	C	T	0.0754887	9	97137031	1.12739e-35	157.12935812227	CTSV
rs10981323	-0.18849	0.0165674	C	C	0.446832	9	97241897	9.7382e-30	129.439823801093	CTSV
rs1097066	0.534493	0.0158354	G	G	0.380979	1	150348241	1e-200	1139.26817980704	ECM1
rs587605411	-0.356344	0.0476251	T	A	0.0309857	1	150974817	8.1708e-14	55.9844092929386	ECM1
rs74751406	0.562493	0.0384248	C	T	0.0469292	3	186656426	7.67845e-48	214.29449421106	FETUB
rs184036273	0.811577	0.061	G	A	0.0184389	3	186696470	6.42082e-40	177.010810784467	FETUB
rs5030103	-1.40629	0.0693812	T	C	0.0138639	3	186731139	6.96627e-89	410.833796692387	FETUB
rs1075398	0.774509	0.0206846	A	C	0.161237	3	57103568	1e-200	1402.03444574141	IL17RD
rs61515277	0.288051	0.0457028	C	A	0.0348676	3	57163521	3.09741e-10	39.7240169304861	IL17RD
rs1654523	-0.590329	0.0292149	C	C	0.0829752	19	50981938	2.32075e-88	408.30004600567	KLK7
rs268898	0.0964507	0.0167517	A	G	0.438722	19	50988912	8.87964e-09	33.1507222136043	KLK7
rs1050855	-0.146682	0.0166053	G	A	0.490226	8	55880027	1.2588e-18	78.0297460372758	LYN
rs10133793	0.155602	0.0175565	A	C	0.331	14	94584813	9.69081e-19	78.5514973452485	SERPINA5
rs113430136	0.213041	0.0336216	C	T	0.0643976	1	204289080	2.49295e-10	40.1503772258443	REN
rs148131084	0.480572	0.0766672	C	G	0.0115763	16	1193869	3.86083e-10	39.2914197744888	TPSB2
rs7203762	-0.635707	0.017001	T	C	0.2709	16	1238131	1e-200	1398.18633257961	TPSB2
rs148665401	0.493347	0.0461374	C	T	0.0326494	16	1407674	1.73223e-26	114.340147858103	TPSB2
rs61743495	0.335837	0.0427533	T	C	0.0389574	16	1434454	4.56958e-15	61.7046366041209	TPSB2
rs79923112	0.453104	0.0742539	G	C	0.0126854	1	161158854	1.10113e-09	37.2355055482519	UFC1
rs2616262	0.116683	0.0165558	G	G	0.497643	4	87802058	1.98456e-12	49.6723641352488	IBSP
rs3822295	-0.140797	0.0252927	A	C	0.124913	4	113748360	2.68906e-08	30.9882047535666	CAMK2D
rs2403087	-0.340204	0.0180095	A	A	0.281575	8	85124266	1.00977e-77	356.841634481635	CA13
rs56174027	-1.22344	0.0311756	T	C	0.062734	8	85258431	1e-200	1540.0531517512	CA13
rs3181348	-0.244436	0.0165723	G	A	0.426452	9	114931904	1.56806e-48	217.552843179637	TNFSF8
rs7800251	0.102777	0.0166728	C	A	0.450021	7	143343268	7.45799e-10	37.9992296453733	EPHA1
rs34073391	-0.721515	0.0216221	G	T	0.153404	7	143419528	1e-200	1113.51221491913	EPHA1
rs2966708	-0.197163	0.0163702	T	C	0.480799	7	143500275	4.3271e-33	145.058393916917	EPHA1
rs1250258	-0.285448	0.0185882	C	C	0.266602	2	215435462	2.15129e-52	235.819294444476	FN1
rs3787004	-0.138794	0.016505	C	C	0.474768	19	657666	4.92616e-17	70.7148015642676	FSTL3
rs4865901	0.111919	0.0187994	A	G	0.265354	5	54993327	2.75021e-09	35.442117820334	GZMA
rs61088131	0.124651	0.022779	T	C	0.161722	19	42196795	4.59412e-08	29.9448557039488	GSK3A
rs8177643	0.15904	0.0175913	C	T	0.317482	10	5974657	1.96834e-19	81.7366556261993	IL15RA
rs3745545	-0.139215	0.0229695	T	C	0.154651	19	7211830	1.42225e-09	36.7340641685544	INSR
rs116862882	-0.268485	0.044705	T	C	0.0354915	14	94500380	1.99763e-09	36.0684812556825	SERPINA4
rs10135681	0.271951	0.0169685	T	C	0.377513	14	94541407	7.89136e-57	256.858779535497	SERPINA4
rs10147337	0.782931	0.0182044	A	T	0.210592	14	94559223	1e-200	1849.66994268014	SERPINA4
rs1050855	-0.137026	0.0166168	G	A	0.490226	8	55880027	1.92539e-16	68.0003542096677	LYN
rs7329947	0.240615	0.0168504	G	A	0.381603	13	37524954	1.22593e-45	203.903634165615	POSTN
rs7709258	-0.196454	0.0170168	T	T	0.363857	5	150108347	1.45541e-30	133.280300316358	PDGFRB
rs246395	-0.496531	0.0167465	T	C	0.32684	5	150120109	2.1219e-182	879.112850696767	PDGFRB
rs3828610	-0.649991	0.0156066	A	C	0.367323	5	150156062	1e-200	1734.59498981648	PDGFRB
rs2365715	-0.31023	0.0165442	A	G	0.37779	1	156645322	1.22372e-76	351.62200222131	BCAN
rs4987388	0.156461	0.0182664	A	A	0.279842	1	169689445	1.30183e-17	73.3679316766656	SELE
rs3862006	0.386843	0.0229056	G	A	0.147927	10	109991006	8.69155e-63	285.224048817401	XPNPEP1
rs11568018	0.458801	0.0264426	G	C	0.105435	1	230715449	4.22045e-66	301.051226415754	AGT
rs1111051	0.253534	0.037841	T	C	0.0503951	1	230742742	2.24167e-11	44.8897521210578	AGT
rs208674	0.19021	0.016655	T	C	0.405518	11	34420905	5.96363e-30	130.429976816855	CAT
rs4756148	-0.349438	0.0194518	C	T	0.229031	11	34465650	1.26452e-70	322.716128534915	CAT
rs6446961	0.495265	0.0158518	C	T	0.408152	4	73772764	1e-200	976.153480459225	CXCL6
rs74361503	-0.387938	0.0370729	C	T	0.0521974	4	73801611	1.91801e-25	109.499346053586	CXCL6
rs6862301	0.189295	0.0181004	C	A	0.293221	5	149404127	2.04402e-25	109.370938971046	IL17B
rs4784790	0.341436	0.0325279	G	G	0.0682795	16	57316119	1.36699e-25	110.180963930838	CCL22
rs170364	-0.227769	0.019172	T	T	0.251144	16	57376022	2.99025e-32	141.141389779844	CCL22
rs10793518	-0.131641	0.0215109	A	A	0.180785	10	44015012	9.86251e-10	37.4511521393638	CXCL12
rs1023264	0.176212	0.017863	C	C	0.325939	10	44398308	8.25634e-23	97.3110512896259	CXCL12
rs1072695	0.101976	0.0176475	C	T	0.332109	13	45697956	7.85078e-09	33.3910106781967	CPB2
rs1041166	0.529038	0.0159569	T	A	0.388673	13	45981085	1e-200	1099.19992223429	CPB2
rs3742266	-0.317618	0.0248983	G	A	0.125329	13	46104904	7.15476e-37	162.731198330604	CPB2
rs7322891	0.123708	0.0165658	C	C	0.469084	13	46112482	9.12002e-14	55.7661604255396	CPB2
rs223895	0.179432	0.0174447	T	T	0.346042	16	57406984	1.2082e-24	105.796861758723	CCL17
rs28695417	0.510802	0.0292765	G	A	0.0849161	16	57410006	8.35521e-67	304.415573596546	CCL17
rs1863730	-0.0915349	0.016741	T	C	0.45626	10	52332892	4.71176e-08	29.8958310162587	DKK1
rs1159798	-0.402413	0.019055	A	A	0.232636	10	52652733	4.17666e-96	445.991003459788	DKK1
rs11003047	0.570006	0.0263877	T	G	0.105435	10	52674751	2.51046e-100	466.611865605328	DKK1
rs73185669	0.352302	0.0592415	G	C	0.0200333	3	186746268	2.86084e-09	35.3653633601729	ADIPOQ
rs76071583	-0.88664	0.0496828	A	G	0.0277277	3	186840083	9.6595e-70	318.480255660441	ADIPOQ
rs17366653	-0.835872	0.0741903	T	C	0.0125468	3	186853027	3.3614e-29	126.936143750914	ADIPOQ
rs4905172	0.535752	0.0400434	C	C	0.0439484	14	94233801	2.41272e-40	179.005226369351	SERPINA1
rs55704412	0.306852	0.0470428	G	A	0.0322335	14	94282356	7.36529e-11	42.5472593166798	SERPINA1
rs79247904	0.355845	0.0508004	G	A	0.027797	14	94309697	2.69739e-12	49.0667702366881	SERPINA1
rs143038446	0.413104	0.0670697	C	T	0.0155275	14	94363153	7.69813e-10	37.9372697708006	SERPINA1
rs28929474	-1.8065	0.0576364	C	T	0.0187855	14	94378610	1e-200	982.386166604253	SERPINA1
rs17580	-0.86525	0.0410714	T	A	0.0402745	14	94380925	1.16439e-95	443.817274573536	SERPINA1
rs6444149	-0.559333	0.0177767	A	A	0.261819	3	186608012	1e-200	990.007761208983	AHSG
rs78048160	0.37959	0.0605012	A	G	0.0189935	3	186656837	3.7202e-10	39.3642107396807	AHSG
rs34008398	-0.579365	0.085333	G	A	0.00949674	2	68866281	1.21506e-11	46.0967686542428	BMP10
rs55880126	-0.728277	0.0238045	T	G	0.124567	4	184670083	2.2042e-193	935.998303330381	CASP3
rs12644905	0.318867	0.0448023	C	T	0.0350756	4	184755529	1.20756e-12	50.6545582199056	CASP3
rs11586183	-0.843316	0.0623302	A	T	0.0177457	1	203214444	3.30948e-41	183.055861411981	CHIT1
rs2486070	-0.919383	0.0189702	G	A	0.179814	1	203226561	1e-200	2348.81666158846	CHIT1
rs3774275	-0.213235	0.0176305	A	G	0.309303	3	187247480	2.36716e-33	146.280933422776	MASP1
rs10734190	-0.311376	0.0224849	T	T	0.155552	11	11980040	4.62296e-43	191.773391939895	DKK3
rs11022114	0.47715	0.0170313	G	A	0.310481	11	12017327	4.91486e-164	784.89987230911	DKK3
rs1690278	-0.109823	0.0168402	C	G	0.473659	12	64739864	7.43088e-11	42.5296800943831	GNS
rs2515960	0.165991	0.01688	A	G	0.435949	4	2950077	1.11956e-22	96.6994932201938	HGFAC
rs363069	-0.301754	0.0391172	A	G	0.0471371	4	3131124	1.3823e-14	59.507341760184	HGFAC
rs151028888	-0.359055	0.0452954	C	T	0.0338278	4	3427690	2.58443e-15	62.8367564492747	HGFAC
rs2344206	-0.795497	0.0214817	G	A	0.149868	4	3470595	1e-200	1371.32311937098	HGFAC
rs148659834	-0.853805	0.0702144	G	A	0.0135866	14	92709697	1.08352e-33	147.864871243264	LGMN
rs2236264	-0.187174	0.0220514	C	T	0.169278	14	92732735	2.52506e-17	72.047465663498	LGMN
rs977785	-0.187434	0.0188693	A	A	0.261472	6	6588648	4.19648e-23	98.6700091243008	LY86
rs16844464	-0.979512	0.0465103	C	T	0.0309857	4	3493229	1.33482e-95	443.528202300895	LRPAP1
rs34231037	-1.11205	0.0465962	A	G	0.0307778	4	55106779	3.16219e-121	569.570683484989	KDR
rs2305948	0.526536	0.0272717	C	T	0.0990573	4	55113391	5.0663e-81	372.762072823019	KDR
rs138595949	-0.39294	0.0701716	G	A	0.0142798	4	55155678	2.22614e-08	31.3566546902262	KDR
rs78498771	-0.353798	0.0590314	G	A	0.0200333	4	55240580	2.15417e-09	35.9206825838937	KDR
rs58432601	0.15153	0.024914	G	A	0.127478	6	160463068	1.24651e-09	36.992214122095	PLG
rs11751347	-0.539672	0.0267928	C	T	0.101414	6	160671406	7.89112e-88	405.717338197219	PLG
rs3823055	-0.146284	0.0182261	A	A	0.290309	6	160717885	1.16627e-15	64.4178397820819	PLG
rs150683617	1.00581	0.0506899	T	C	0.0264106	6	160784251	2.35682e-85	393.721407894666	PLG
rs62435485	-0.278562	0.0477724	T	A	0.0311937	6	161045983	5.74696e-09	34.0008382185235	PLG
rs12449853	0.138133	0.0208194	A	C	0.196312	17	44049191	3.48411e-11	44.0208545923192	PYY
rs511619	0.63166	0.0439491	A	A	0.0357688	9	27196496	3.33351e-46	206.569776736009	TEK
rs35030851	0.859212	0.0395199	G	T	0.0438098	9	27197488	1.44537e-101	472.681923093054	TEK
rs116843064	-0.59482	0.0571648	G	A	0.0209344	19	8364439	3.53109e-25	108.271399022783	ANGPTL4
rs1543852	-0.288002	0.0168434	A	A	0.387218	8	85440529	2.76894e-64	292.369107785946	CA3
rs6049191	0.706363	0.019843	G	T	0.178844	20	23866528	1e-200	1267.1884914149	CST5
rs67927430	0.136142	0.0185268	C	C	0.271038	20	23942700	2.22653e-13	53.9987151323233	CST5
rs4242051	-0.181186	0.0191393	T	T	0.248926	5	54902947	3.83034e-21	89.618397701673	ESM1
rs1895413	0.101468	0.0165901	G	G	0.498822	5	54962065	1.00849e-09	37.4076299081013	ESM1
rs2122720	-0.114321	0.0164133	A	A	0.476154	4	65385355	3.56929e-12	48.5132326252745	EPHA5
rs6849874	-0.114263	0.0177109	A	A	0.318383	4	65415013	1.17863e-10	41.6226745144177	EPHA5
rs28663440	0.403083	0.0313429	G	T	0.0743103	4	65595644	1.93412e-37	165.390519090729	EPHA5
rs13149202	0.114864	0.0199403	G	A	0.227298	4	66118613	8.7354e-09	33.1821480031742	EPHA5
rs9487731	-0.142789	0.0213955	T	C	0.183627	6	111833645	2.6777e-11	44.5394268335329	FYN
rs4256810	0.330034	0.0174927	T	C	0.317205	1	206717104	1.53608e-77	355.962026071657	MAPKAPK2
rs56119332	-0.387659	0.0319598	A	G	0.0725773	7	44773770	1.55965e-33	147.126748258016	PPIA
rs262505	0.340077	0.0182467	C	C	0.281714	2	63634652	9.36708e-76	347.364840656796	MDH1
rs7537361	-0.110403	0.0179464	G	G	0.313392	1	45029523	8.06873e-10	37.8448739225679	PRDX1
rs11211133	0.357692	0.0194818	G	A	0.232081	1	45525407	1.27587e-73	337.101195611427	PRDX1
rs300750	-0.63417	0.0147967	T	T	0.496049	2	208794	1e-200	1836.88365454581	ACP1
rs10199876	-0.550469	0.017268	T	T	0.284902	2	283794	1e-200	1016.20576158752	ACP1
rs2203063	0.0982209	0.0167877	C	C	0.422778	2	338364	5.10761e-09	34.2314597350189	ACP1
rs79344818	-1.18714	0.0427437	A	G	0.0356994	7	66988489	2.22243e-161	771.364505714878	SBDS
rs2234222	0.274344	0.0377888	G	C	0.0489394	13	45339402	4.27742e-13	52.7066	TPT1
rs11680831	-0.513707	0.0163099	T	C	0.349231	2	71065392	1e-200	992.038143057891	NAGK
rs62143760	-0.101785	0.0179615	C	T	0.313046	2	71472697	1.51039e-08	32.1131092430701	NAGK
rs2291266	-0.400189	0.0216423	C	A	0.16595	12	93426357	1.26912e-74	341.919184002795	UBE2N
rs74434374	-0.260579	0.0363861	C	A	0.054069	6	31882531	8.76839e-13	51.2870605407933	HSPA1A
rs2070600	-0.741764	0.0383553	C	T	0.0474837	6	32183666	2.79676e-81	374.007865693655	AGER
rs6098926	-0.200722	0.0256253	A	G	0.115763	20	38275548	5.44821e-15	61.3552929973655	BPI
rs4287822	0.421909	0.0167843	A	G	0.351449	20	38293108	9.7815e-134	631.874912074016	BPI
rs6127742	-0.749556	0.02612	G	A	0.100097	20	38322148	1.38492e-171	823.496626970819	BPI
rs220546	-0.164289	0.0246247	C	T	0.129211	20	38617395	2.71577e-11	44.5117916833164	BPI
rs77444140	-0.971168	0.0610293	G	A	0.0183696	5	41171293	4.58931e-56	253.228131564389	C6
rs4957379	0.510501	0.0277033	T	C	0.0938583	5	41206940	3.90794e-74	339.570679914209	C6
rs138054038	-0.454247	0.0567865	T	C	0.0218356	5	41243435	1.44829e-15	63.9873215581148	C6
rs28399976	-0.788712	0.0622757	C	G	0.0175378	6	31758201	2.25498e-36	160.398263176343	CFB
rs190263387	-0.947595	0.0602887	G	T	0.0187162	6	31819343	9.22143e-55	247.043642653326	CFB
rs541862	0.816341	0.0268904	T	C	0.0929572	6	31949174	1.29763e-190	921.613214491434	CFB
rs73039984	-0.190756	0.028254	C	T	0.097047	12	5440290	1.57703e-11	45.5823312081819	NTF3
rs61908059	0.156801	0.0275556	G	A	0.0998198	12	5568422	1.31745e-08	32.3800796284473	NTF3
rs9355291	-0.321649	0.0221637	C	T	0.163039	6	160568256	4.63529e-47	210.610434891363	PLG
rs12211977	-0.54473	0.0268489	G	A	0.102523	6	160831738	4.77364e-89	411.632439728458	PLG
rs4253304	0.36051	0.0162797	G	C	0.420006	4	186252417	3.5266e-105	490.390261139275	KLKB1
rs10149025	-0.224922	0.026842	A	G	0.105157	14	94594699	6.33046e-17	70.2156837217914	SERPINA3
rs17753556	-0.525621	0.0204451	C	A	0.189172	14	94629097	1.54598e-139	660.94746026665	SERPINA3
rs6136	-0.643764	0.0255934	T	G	0.10793	1	169594713	6.70446e-134	632.699374249514	SELP
rs11794797	0.748249	0.0177076	G	A	0.231249	9	115052994	1e-200	1785.55356869133	TNC
rs112637280	-0.204772	0.0254363	G	A	0.1202	9	115111431	9.58076e-16	64.8086935998615	TNC
rs10982670	-0.137839	0.0166504	A	C	0.419174	9	115320267	1.47423e-16	68.5322333529442	TNC
rs2633322	0.413473	0.018235	T	T	0.260641	10	73934174	5.21385e-110	514.141635857426	PLAU
rs138437684	-0.367793	0.0588911	C	T	0.0198253	10	74012183	4.46975e-10	39.0038597219868	PLAU
rs145462852	0.332529	0.0563025	A	C	0.0221822	1	196350092	3.6618e-09	34.8821860458324	CFH
rs1048663	-0.601286	0.0212371	G	A	0.162138	1	196705852	2.60205e-167	801.62593620363	CFH
rs243837	-0.11658	0.0169817	A	T	0.38902	16	55498847	7.20037e-12	47.1287	MMP2
rs8177245	0.171696	0.0175016	A	G	0.335505	3	133760386	1.407e-22	96.2420460899243	TF
rs73140051	-0.118233	0.0184035	G	A	0.280466	7	76335899	1.40728e-10	41.2740007446172	YWHAG
rs113612161	-0.947738	0.0590627	C	T	0.0198253	1	10403531	5.82932e-57	257.483850727469	PGD
rs67178903	0.209896	0.0370171	G	A	0.0532372	1	19044833	1.48094e-08	32.1516703366589	AKR7A2
rs74430522	-0.521227	0.0277181	G	A	0.0943435	1	19262680	4.72472e-77	353.611918397406	AKR7A2
rs10917454	0.199063	0.0169642	T	C	0.408083	1	19469357	1.64262e-31	137.693779805965	AKR7A2
rs7520156	-1.3829	0.0307011	A	T	0.0607237	1	45446590	1e-200	2028.96091367001	AKR1A1
rs74849674	0.229721	0.0353279	C	A	0.0596839	1	45489242	8.42392e-11	42.2829959465667	AKR1A1
rs61751012	-0.958253	0.0788624	G	A	0.0110218	1	45566635	1.20729e-33	147.645561471915	AKR1A1
rs225628	-0.266426	0.0164987	T	C	0.474283	6	142151799	1.18744e-57	260.767676652455	VTA1
rs2077836	-0.10284	0.0167984	T	C	0.457091	6	142600924	9.72528e-10	37.4790262773043	VTA1
rs71592765	0.367916	0.0292711	C	G	0.0849854	5	108755299	7.38867e-36	157.986239934176	FER
rs62022255	-0.171795	0.0309943	A	C	0.0776376	15	98637139	3.08215e-08	30.7225581465901	IGF1R
rs7162314	0.239139	0.0203011	G	G	0.206849	15	98946687	9.70556e-32	138.759164669871	IGF1R
rs12996377	-0.35818	0.0247533	T	A	0.124567	2	102214018	8.44644e-47	209.380606546705	IL1RL1
rs12987977	-0.593138	0.0155238	T	G	0.384999	2	102358876	1e-200	1459.87415177401	IL1RL1
rs34214448	-0.501456	0.0159771	G	T	0.387079	17	51154651	1e-200	985.07604326867	NME2
rs11658903	-0.367741	0.024674	A	G	0.126161	17	51233299	1.68469e-49	222.128858410454	NME2
rs4814391	0.1842	0.0243424	C	T	0.133786	20	1622497	4.29185e-14	57.260147520889	NSFL1C
rs73105364	0.376946	0.0445447	C	T	0.0354222	7	44440865	3.1464e-17	71.6087679201213	NUDCD3
rs6490169	-0.5314	0.0441975	C	T	0.0364619	12	118131829	5.533e-33	144.559850752194	PEBP1
rs1051077	0.520718	0.0336393	C	T	0.0612089	12	118145103	3.40422e-53	239.613498952269	PEBP1
rs56112103	-0.198497	0.0164492	A	A	0.478026	17	82336294	3.28016e-33	145.619096683987	P4HB
rs71363738	0.582813	0.0453537	G	T	0.0347983	19	47515000	2.19576e-37	165.132674486496	NAPA
rs12941069	-0.152241	0.0172714	T	T	0.344586	17	76464503	1.486e-18	77.6977014428411	SPHK1
rs11023063	0.491436	0.0155955	T	C	0.495078	11	14047024	1e-200	992.96817356987	SPON1
rs3815984	0.320595	0.0347411	C	T	0.0598919	11	14253979	3.55582e-20	85.1581776267413	SPON1
rs7138740	-0.346424	0.0180141	T	A	0.284972	12	6874600	2.05894e-80	369.820350130524	TPI1
rs6036492	0.128237	0.0166666	C	C	0.430126	20	23721534	1.61255e-14	59.2014950194129	CST2
rs4260306	-0.512363	0.0175648	C	T	0.282961	20	23749699	6.4013e-177	850.881539759039	CST2
rs3856718	0.355246	0.0215859	G	A	0.17108	3	113277371	9.0476e-60	270.843284317108	BOC
rs676397	0.401401	0.0271337	A	A	0.101345	12	9955834	8.3484e-49	218.84612553955	CLEC1B
rs521040	0.426407	0.0183401	T	C	0.259809	12	9995251	2.29123e-115	540.561675986268	CLEC1B
rs73054650	-0.173408	0.026055	C	G	0.110703	12	10027242	3.03097e-11	44.2951425495593	CLEC1B
rs2794520	-0.273903	0.0174272	C	T	0.325177	1	159709026	9.31131e-55	247.023543551715	CRP
rs2228615	-0.965838	0.0131561	G	A	0.381949	19	10292692	1e-200	5389.57158685747	ICAM1
rs378395	-0.146177	0.0166264	A	C	0.468044	19	10315746	1.81623e-18	77.296822243601	ICAM1
rs55986634	0.160119	0.01671	G	A	0.427839	15	63983446	1.27735e-21	91.8190591750497	DAPK2
rs16982345	0.669867	0.0169806	G	A	0.26175	19	18389912	1e-200	1556.22039780028	GDF15
rs74953716	0.307817	0.0427244	C	T	0.0387495	19	18587889	6.40601e-13	51.9078758890053	GDF15
rs55935606	0.364026	0.0200399	A	G	0.201026	3	49528072	3.89354e-72	329.969430376217	MST1
rs11130218	0.541762	0.0153372	C	C	0.490642	3	49714939	1e-200	1247.74235503709	MST1
rs6104034	-0.224728	0.0164709	G	G	0.47858	20	45137017	7.23273e-42	186.157146195624	SLPI
rs6542680	0.657269	0.0196628	C	C	0.190905	2	3592552	1e-200	1117.36631597515	COLEC11
rs11123637	0.190796	0.0170923	T	T	0.363233	2	3606600	1.06585e-28	124.605587577605	COLEC11
rs28502318	0.902698	0.0138289	C	C	0.369472	17	79730489	1e-200	4260.98188823768	ENPP7
rs11658405	0.187752	0.0289045	C	T	0.0907389	17	79824192	8.82027e-11	42.1927878084399	ENPP7
rs142209667	0.517639	0.0629571	C	T	0.0178151	14	73874982	2.3519e-16	67.6027790289576	ENTPD5
rs181561809	0.474107	0.0694731	T	C	0.0146957	14	73982522	9.55132e-12	46.5714091207093	ENTPD5
rs8003415	0.477967	0.0493925	A	A	0.0285595	14	74093504	5.1423e-22	93.6426744592494	ENTPD5
rs11159064	-1.06548	0.0313623	A	A	0.0650215	14	74148040	1e-200	1154.18332207879	ENTPD5
rs12145855	-0.245966	0.0365521	C	T	0.0547622	1	157568113	1.83676e-11	45.2819885569816	FCRL3
rs2485066	-0.564044	0.0153233	C	C	0.474768	1	157662711	1e-200	1354.94404010728	FCRL3
rs74121555	0.24898	0.0351683	C	T	0.0589907	1	157846607	1.58124e-12	50.1217440331907	FCRL3
rs8024934	-0.127742	0.0166201	A	C	0.44808	15	88893254	1.71877e-14	59.0745140535179	MFGE8
rs34239095	0.442825	0.0178388	C	G	0.279703	15	88912537	1.33368e-130	616.216027252307	MFGE8
rs7121898	-0.667038	0.015631	A	A	0.352489	11	116926130	1e-200	1821.0741308858	PCSK7
rs7934690	0.224294	0.0181824	T	A	0.293359	11	117140583	1.29606e-34	152.171351146603	PCSK7
rs140205161	0.545734	0.074344	A	G	0.0124775	4	87437531	2.358e-13	53.8852838957894	SPARCL1
rs12648586	0.609527	0.0157762	C	T	0.347082	4	87502390	1e-200	1492.72941084225	SPARCL1
rs7078438	-0.193143	0.0179469	C	C	0.303618	10	124109086	8.31386e-27	115.818799699568	CHST15
rs142322855	0.242589	0.0371016	G	A	0.0530293	11	57319582	6.63792e-11	42.7520486543534	SERPING1
rs117635824	-0.447649	0.0670201	C	T	0.0153889	11	57415425	2.5789e-11	44.6133765890498	SERPING1
rs11601449	-0.653005	0.0158003	G	A	0.32989	11	57756838	1e-200	1708.05695197633	SERPING1
rs2230199	-0.143409	0.0205581	G	C	0.201442	19	6718376	3.3111e-12	48.6616539970205	C3
rs12439429	-0.183085	0.01652	C	C	0.460627	15	49442437	2.57638e-28	122.824623850905	FGF7
rs2413977	-0.163605	0.0177057	A	G	0.320671	15	49916375	3.17946e-20	85.382121505498	FGF7
rs72981675	-0.742575	0.0230443	C	T	0.130805	11	102850520	1e-200	1038.37352600387	MMP12
rs116951508	0.281055	0.0440632	C	T	0.0363233	11	102895415	1.89954e-10	40.6846481310462	MMP12
rs7951615	-0.224288	0.0164461	G	G	0.484057	11	112768825	7.86372e-42	185.988556302226	NCAM1
rs11214489	-0.359937	0.0207921	C	T	0.190143	11	113105212	8.17268e-66	299.67897504714	NCAM1
rs2288158	0.459764	0.0239533	T	G	0.134063	11	113262954	4.02123e-80	368.416623128953	NCAM1
rs116924815	1.28774	0.048344	C	T	0.028005	19	50727476	3.4752e-149	709.530729924701	CLEC11A
rs7204669	0.30323	0.0173419	G	A	0.319354	16	2860735	4.4165e-67	305.739095675837	PRSS22
rs4279202	-1.138	0.0211708	C	T	0.127201	4	15573801	1e-200	2889.41541430443	BST1
rs114667404	0.337121	0.0534135	C	T	0.0246777	4	15660215	2.9266e-10	39.8354327645333	BST1
rs16892370	-0.89664	0.0383992	G	A	0.0451269	4	15753476	2.58613e-116	545.245218314111	BST1
rs7699101	-0.092498	0.0166328	T	T	0.456606	4	15902819	2.77537e-08	30.9267265338374	BST1
rs1047070	0.14037	0.0208975	G	A	0.197144	11	125957177	1.99502e-11	45.1190484617344	CDON
rs7120521	-1.02896	0.0270442	C	T	0.0858866	11	126012278	1e-200	1447.60044002691	CDON
rs562672	-0.155372	0.0167928	C	C	0.4155	11	126113569	2.84312e-20	85.6050294606094	CDON
rs240551	0.31431	0.0421576	G	A	0.0394427	11	126333862	9.99047e-14	55.5858997142778	CDON
rs67023356	0.490378	0.018833	A	G	0.232081	19	14396821	6.27561e-143	677.98946137901	ADGRE2
rs12461521	0.213313	0.0167319	C	C	0.433315	19	14780598	7.88566e-37	162.533963698415	ADGRE2
rs2285965	-0.113917	0.0195741	C	A	0.232705	19	5597015	6.14586e-09	33.8698655921853	FUT3
rs8106995	-0.214275	0.0164907	C	C	0.452724	19	5827609	3.55906e-38	168.835910976899	FUT3
rs112313064	-0.527749	0.0160349	T	C	0.38999	19	5831713	1e-200	1083.23410843252	FUT3
rs778809	-0.509359	0.0166862	G	A	0.330306	19	5830291	1.40166e-192	931.822255867704	FUT5
rs8101385	-0.353554	0.0309891	C	T	0.0786774	19	5838584	6.79762e-30	130.164808354428	FUT5
rs11666151	-0.336084	0.0162727	G	G	0.412866	19	5871651	4.06684e-92	426.556376951172	FUT5
rs6734849	0.11918	0.0167402	T	G	0.408984	2	142985443	1.18852e-12	50.6857033586373	KYNU
rs16858549	-0.877743	0.0194135	T	C	0.171704	2	143043227	1e-200	2044.21734627593	KYNU
rs753381	-0.153841	0.0165639	T	T	0.450437	20	41168825	2.04847e-20	86.2618938476251	PLCG1
rs11107468	-0.537486	0.0155068	T	C	0.42465	12	94231606	1e-200	1201.40640238645	PLXNC1
rs11107483	0.177226	0.0206433	C	G	0.200957	12	94254327	1.09934e-17	73.7049444214503	PLXNC1
rs9525140	0.118253	0.0174349	C	C	0.342299	13	87250230	1.27401e-11	46.0029214849376	SLITRK5
rs12856670	-0.22543	0.0181012	C	T	0.291141	13	88034278	3.06515e-35	155.098889474982	SLITRK5
rs204074	-0.295365	0.0319945	T	C	0.0716068	1	28865051	3.43895e-20	85.225078002342	EPB41
rs12403568	-0.100374	0.0166658	G	T	0.482116	1	29131266	1.79901e-09	36.2735559053305	EPB41
rs5994442	-0.106774	0.0188597	C	T	0.257175	22	31875946	1.55824e-08	32.0524672471789	YWHAH
rs12900924	-0.148016	0.0216159	C	T	0.179398	15	43737329	8.13056e-12	46.8889688508991	PDIA3
rs72856690	-1.14918	0.0564859	G	A	0.0210037	4	73507241	1.62796e-89	413.900558500208	AFM
rs2091583	0.420784	0.0518675	T	C	0.0262027	4	73550995	5.77498e-16	65.8154422997529	AFM
rs28385609	-0.482748	0.0228083	C	T	0.144323	6	122801319	1.63587e-96	447.976397614529	SMPDL3A
rs10513364	-1.0449	0.0838157	T	C	0.0097047	9	121249890	2.6194e-35	155.417065814393	GSN
rs76463933	-0.481878	0.0480899	C	T	0.0304312	9	121327414	1.76601e-23	100.40756853712	GSN
rs306788	0.150492	0.0217986	C	T	0.178982	9	121357729	5.49546e-12	47.661710380828	GSN
rs11656836	-0.275333	0.0203232	G	T	0.203175	17	58257173	2.61003e-41	183.540686395523	LPO
rs3617	0.16143	0.016547	C	A	0.457993	3	52799789	2.39332e-22	95.1765503230461	ITIH4
rs3917824	0.187162	0.0262977	G	C	0.114723	1	169595344	1.20903e-12	50.6523759205537	SELL
rs75776028	-0.575785	0.0173084	A	G	0.275406	1	169684654	1e-200	1106.64123068966	SELL
rs924204	0.371275	0.0162093	A	A	0.408291	1	16187431	3.85267e-112	524.641804527473	EPHA2
rs1624327	-0.133728	0.0188136	A	A	0.267572	9	84814375	1.28983e-12	50.5243676391382	NTRK2
rs6921438	-0.177079	0.0166979	G	A	0.478719	6	43957870	4.39942e-26	112.46319306321	VEGFA
rs140254447	0.434493	0.0422936	C	G	0.0391654	14	20664500	1.37348e-24	105.539798576324	ANG
rs12433832	0.220851	0.0250275	C	T	0.123388	14	20665025	1.36414e-18	77.8688570148503	ANG
rs4982326	0.831917	0.0240267	G	A	0.115417	14	20689777	1e-200	1198.86904454818	ANG
rs17242790	-0.4466	0.051645	G	A	0.0270345	14	20698068	6.41425e-18	74.7792102036812	ANG
rs547138	-0.286206	0.0166585	T	T	0.396229	13	113137856	7.14426e-65	295.179152666699	F10
rs2480948	-0.240833	0.0210188	T	C	0.18737	13	113163223	3.90374e-30	131.285316556835	F10
rs17614093	0.126308	0.0168571	C	G	0.430195	17	34182237	7.54051e-14	56.1430484960342	CCL7
rs3138036	-0.659393	0.0211177	A	G	0.167406	17	34320525	1e-200	974.979384775823	CCL7
rs1591734	-0.18865	0.0237728	C	T	0.142105	1	169302664	2.41259e-15	62.9727915452287	F5
rs61808983	-0.831266	0.0370778	C	T	0.0490087	1	169505159	1.13574e-107	502.634298180809	F5
rs6685578	-0.115112	0.0164985	C	G	0.485027	1	169566115	3.28038e-12	48.6801913827108	F5
rs11794565	0.241888	0.0163827	C	T	0.456329	9	127838998	1.25914e-48	218.000600682076	ENG
rs140960667	0.45092	0.0624738	C	T	0.0173991	11	67168860	5.82523e-13	52.0958526865591	GSTP1
rs117149657	0.522659	0.0673977	T	A	0.0153196	11	67580109	1.00613e-14	60.1376861315764	GSTP1
rs947895	-0.515633	0.0162806	C	A	0.347567	11	67586935	1e-200	1003.09160457617	GSTP1
rs117559122	-0.222671	0.0402696	C	T	0.0449189	17	35750440	3.32368e-08	30.5754380272492	CCL16
rs10445391	-1.29322	0.0244563	A	G	0.0919174	17	35979070	1e-200	2796.16836970475	CCL16
rs57701631	-0.186026	0.0228782	T	C	0.150631	11	102786249	4.96517e-16	66.1155463498891	MMP1
rs1144396	-0.309328	0.0162245	C	C	0.499237	11	102808321	4.21726e-79	363.492809044437	MMP1
rs655316	0.132737	0.0177097	T	T	0.317344	11	102961635	7.4113e-14	56.1773937559485	MMP13
rs11651783	-0.306614	0.0200799	C	T	0.214751	17	7544593	7.83088e-52	233.163663520572	SHBG
rs1050541	-0.131251	0.0167358	T	T	0.459032	17	7657517	5.05111e-15	61.5052640791303	SHBG
rs4872196	0.188057	0.0261855	C	T	0.110703	8	23834554	7.57112e-13	51.5771410708754	STC1
rs2795108	0.255113	0.0246105	T	C	0.127755	9	73150562	5.29939e-25	107.45442521991	ANXA1
rs11638139	0.118148	0.0197456	C	G	0.23118	15	60284709	2.28867e-09	35.8023949164611	ANXA2
rs8033800	0.23546	0.016997	T	T	0.386178	15	60396980	4.33521e-43	191.906520200352	ANXA2
rs11259349	0.1042	0.0166919	A	G	0.467351	10	14800948	4.54865e-10	38.9694152849792	CDNF
rs61738953	-1.09924	0.0432188	C	G	0.0352835	10	14820083	9.74369e-137	646.903704953449	CDNF
rs7736193	-0.331193	0.0168703	G	T	0.348399	5	96720415	1.22849e-83	385.404416389676	ERAP1
rs245471	0.784879	0.0139729	G	G	0.487245	5	96837640	1e-200	3155.23940337198	ERAP1
rs72777613	0.130585	0.0186488	T	A	0.262512	5	97143546	2.74392e-12	49.0325866008361	ERAP1
rs1421741	0.36643	0.0421877	T	A	0.0395813	5	97151273	4.60269e-18	75.4415055941252	ERAP1
rs11684231	0.321955	0.020029	C	T	0.217871	2	85400188	3.76496e-57	258.387687508612	CAPG
rs62623452	-1.7656	0.0700509	C	T	0.0128934	2	85402143	2.0553e-134	635.268324909626	CAPG
rs79923841	-0.418173	0.0514311	A	T	0.0266879	2	85428082	4.98292e-16	66.1089639288072	CAPG
rs116866430	-1.58931	0.0851238	T	G	0.00915015	8	85333298	5.21648e-76	348.590242658211	CA1
rs2645050	0.233627	0.0224457	A	G	0.161375	8	85358432	3.41725e-25	108.337736206794	CA1
rs75940688	-0.925535	0.0754721	G	A	0.0119229	20	59220098	3.12257e-34	150.387875662111	CTSZ
rs12936625	0.20039	0.0170939	T	T	0.367808	17	1434769	1.8743e-31	137.426274257734	CRK
rs142979375	-0.326059	0.0530945	G	A	0.0251629	1	168550512	8.6294e-10	37.7131938873552	DPT
rs1018454	-0.431681	0.01601	A	A	0.423125	1	168728523	1.21173e-152	727.014720113639	DPT
rs9633332	0.156276	0.0171255	G	A	0.36656	1	168950339	9.13094e-20	83.2718192774108	DPT
rs35630063	-0.338506	0.0577683	T	C	0.0211424	18	31024408	4.84088e-09	34.3363057227634	DSC3
rs56168207	0.376689	0.0211969	C	T	0.182379	20	45175330	3.49018e-69	315.806579972789	PI3
rs1216973	-0.834876	0.0261521	T	A	0.100513	13	46802203	1e-200	1019.1328883102	ESD
rs17069005	-0.185778	0.0273638	A	G	0.103078	13	46849983	1.21715e-11	46.0930823362947	ESD
rs2227399	0.218955	0.0202549	T	G	0.209344	4	154564701	4.97067e-27	116.855599391795	FGG
rs1060431	0.368647	0.0306218	G	A	0.0783308	17	4937573	4.60812e-33	144.930562148536	GP1BA
rs1330064	-0.314598	0.0171684	G	A	0.345834	13	91405002	2.40626e-73	335.778023431883	GPC5
rs556722	-0.658609	0.017279	T	C	0.259809	13	91786466	1e-200	1452.84108560554	GPC5
rs5848	-0.24927	0.0182402	C	T	0.281575	17	44352876	5.39553e-42	186.758697090318	GRN
rs61004104	0.654765	0.0145083	C	T	0.46132	3	186659662	1e-200	2036.75062562503	HRG
rs1656909	0.214455	0.0211756	A	G	0.190143	3	186721079	6.03196e-24	102.565405900651	HRG
rs73185681	0.310238	0.0375978	G	A	0.0511576	3	186771052	1.84382e-16	68.0871439647152	HRG
rs3826311	0.218327	0.0215831	T	C	0.178982	17	78975444	6.79447e-24	102.32629476352	LGALS3BP
rs3817818	0.206294	0.0165713	C	C	0.459795	22	50260902	3.25915e-35	154.974425230266	MAPK12
rs12210904	0.146546	0.0184461	C	A	0.282823	6	36130414	2.24498e-15	63.1159059232188	MAPK13
rs12200998	-0.146343	0.0166563	G	G	0.465548	6	36114905	1.91204e-18	77.194585335207	MAPK14
rs78181560	-0.714771	0.0446887	G	T	0.0351449	9	127878806	1.30449e-56	255.822303591222	AK1
rs1265947	0.183436	0.0271735	C	T	0.106266	6	31819390	1.58717e-11	45.569890311984	CLIC1
rs953062	0.130824	0.0178242	A	G	0.324553	6	46658616	2.3754e-13	53.8709648824095	PLA2G7
rs33951697	0.513529	0.0204699	C	T	0.184112	1	173489187	3.12604e-133	629.359085503378	PRDX6
rs12570967	-0.227206	0.0383921	C	T	0.0485928	10	70212594	3.40705e-09	35.023202533395	PPA1
rs8192456	0.129038	0.0235775	C	T	0.142312	22	40350208	4.57544e-08	29.9529595003297	ADSL
rs12477178	1.11477	0.0711618	G	A	0.0133093	2	162209363	2.04516e-54	245.401207794699	FAP
rs1799886	0.390392	0.0161979	T	C	0.430265	7	142800839	1.67222e-123	580.87728239836	PRSS2
rs148648889	-0.489777	0.0668553	G	A	0.0155968	7	143123547	2.63004e-13	53.6691960293413	PRSS2
rs35233519	-0.112727	0.0175378	C	T	0.352974	2	151141532	1.37811e-10	41.314801678817	TNFAIP6
rs2278089	0.45787	0.0159246	G	G	0.402052	2	151290158	3.28206e-172	826.69881202593	TNFAIP6
rs822342	-0.36538	0.0186618	T	T	0.258284	9	5453973	3.28166e-83	383.338537329017	CD274
rs2838537	0.159332	0.0173271	G	G	0.351033	21	44263692	4.80089e-20	84.5579	ICOSLG
rs114594620	-0.356236	0.0639727	T	C	0.0174685	1	160731600	2.661e-08	31.008892103992	CD244
rs62087200	-0.764918	0.0373564	G	A	0.049286	17	74463637	1.27575e-90	419.275733694404	CD300C
rs9912017	-0.12267	0.018636	T	G	0.270692	17	74487717	4.95383e-11	43.3282678064474	CD300C
rs3748671	-0.11054	0.0167301	C	C	0.438167	1	207079686	4.19358e-11	43.655789508386	CD55
rs1583091	-0.793445	0.0168954	C	T	0.242271	1	207262693	1e-200	2205.44737339501	CD55
rs147774007	0.317078	0.054259	G	A	0.0243311	1	207655896	5.325e-09	34.1498381366086	CD55
rs8957	0.151545	0.0185781	G	G	0.266325	20	63742354	4.01331e-16	66.5396683110456	TNFRSF6B
rs12074120	0.155682	0.018069	T	G	0.309719	1	37731729	8.42702e-18	74.2349753472831	EPHA10
rs7789303	-0.59113	0.0171843	G	G	0.280882	7	142854785	1e-200	1183.32028408062	EPHB6
rs6943031	0.364761	0.0620194	G	A	0.018023	7	142939774	4.24984e-09	34.5908850856432	EPHB6
rs1775296	0.126066	0.0184463	T	T	0.282545	6	137005667	8.91952e-12	46.7065093714423	IL20RA
rs6917836	-0.223758	0.0268908	G	A	0.105781	6	137132089	1.03369e-16	69.2388263748818	IL22RA2
rs2234711	0.135001	0.0169594	A	G	0.380355	6	137219383	1.98086e-15	63.3655201238415	IL22RA2
rs12569203	0.101877	0.0165265	A	A	0.450575	1	67132664	7.45363e-10	38.0006057423432	IL23R
rs11581607	-0.201988	0.0327826	G	A	0.0683488	1	67242007	7.59609e-10	37.9633342490204	IL23R
rs10058572	0.147757	0.0168059	G	G	0.404617	5	35880755	1.81489e-18	77.298769310522	IL7R
rs78682348	0.141962	0.0231467	A	G	0.149868	19	54489297	9.07044e-10	37.6154318883909	LILRB1
rs1974209	-0.821758	0.0250709	C	T	0.107584	19	54591389	1e-200	1074.35555128554	LILRB1
rs1654656	0.119017	0.0166243	T	T	0.476639	19	54672526	8.91679e-13	51.2544128815699	LILRB1
rs10421822	-0.16542	0.0257246	G	A	0.119229	19	54870060	1.35396e-10	41.3503102093977	LILRB1
rs393665	0.222997	0.0182229	T	A	0.282476	19	54251997	4.27828e-34	149.748698689787	LILRB2
rs399657	-0.806524	0.0178899	G	G	0.216276	19	54289650	1e-200	2032.44482583699	LILRB2
rs2423507	0.108984	0.0173585	C	G	0.36656	20	10633691	3.61923e-10	39.4185912830697	JAG1
rs1051412	0.0943502	0.0166376	A	C	0.498822	20	10673915	1.47549e-08	32.1591300967696	JAG1
rs111505776	0.262283	0.0470208	C	A	0.0321641	19	54729287	2.52094e-08	31.1143159425855	KIR2DL4
rs10500318	-0.554202	0.021729	G	A	0.158533	19	54809324	1.85457e-137	650.514074851992	KIR2DL4
rs652188	0.627318	0.0153878	G	G	0.383544	19	54850487	1e-200	1661.97	KIR2DL4
rs35043300	-0.53385	0.0180318	C	T	0.252877	19	54865069	6.76151e-182	876.516973763614	KIR2DL4
rs112515516	1.25572	0.0415646	A	G	0.0374324	6	31361323	6.72874e-189	912.721775497247	MICB
rs115848506	0.429821	0.06898	C	G	0.0144877	6	31442035	4.89233e-10	38.8265569854352	MICB
rs150934595	0.528538	0.065418	C	T	0.0161514	6	31466221	7.57225e-16	65.2766576260061	MICB
rs139395255	0.623812	0.0533522	A	G	0.024539	6	31481959	2.66979e-31	136.710787435655	MICB
rs41273264	0.540974	0.0576439	C	A	0.0210731	6	31632329	8.28415e-21	88.0736658922005	MICB
rs3132449	-0.831073	0.0254044	C	T	0.106682	6	31658236	1e-200	1070.1889484413	MICB
rs62263730	0.245101	0.0178419	G	A	0.30244	3	112859161	2.06611e-42	188.715670518588	CD200R1
rs13081854	0.106437	0.0188752	A	G	0.264384	3	113094528	1.77526e-08	31.7981699512686	CD200R1
rs75766	0.401726	0.0184868	C	C	0.253015	22	20187330	1.8018e-101	472.211321570063	RTN4R
rs685667	0.203499	0.0181087	C	T	0.279773	22	20202099	4.64161e-29	126.284488891046	RTN4R
rs1642173	-0.220931	0.0179847	G	G	0.308956	22	20222596	2.41951e-34	150.906143639808	RTN4R
rs9411207	0.188335	0.0174161	C	T	0.346458	9	136514099	4.76907e-27	116.939236351689	NOTCH1
rs4808238	0.217443	0.0232101	G	A	0.14973	19	15192918	9.6473e-21	87.7681287899396	NOTCH3
rs146515723	-0.235553	0.0382375	C	T	0.0485235	3	112190140	7.65291e-10	37.9488220363579	CD200
rs1879514	-0.219756	0.0194931	G	G	0.23527	3	112308988	3.11157e-29	127.092423553736	CD200
rs4353572	-0.138043	0.0163982	T	T	0.491751	19	4563925	4.56669e-17	70.8657552557453	SEMA6B
rs150434441	0.536975	0.0159123	A	G	0.424442	19	10298647	1e-200	1138.7862564048	ICAM5
rs58852827	-0.223075	0.0286791	G	A	0.0926799	19	10342333	8.37289e-15	60.5021442526102	ICAM5
rs118167193	-0.56127	0.0420999	A	G	0.0406211	19	10577400	4.49274e-40	177.738508277691	ICAM5
rs1041067	-0.388563	0.0203182	C	T	0.201858	1	160487337	1.45289e-79	365.723127698687	SLAMF6
rs35832030	0.625892	0.0192395	G	T	0.204977	17	1624088	1e-200	1058.30595153767	SCARF1
rs78897108	0.556356	0.046532	C	T	0.0307778	17	1637977	1.22104e-32	142.955909613661	SCARF1
rs9907510	0.127955	0.0174031	A	G	0.332733	17	1701735	2.16113e-13	54.0581639277861	SCARF1
rs3814787	0.191643	0.0178833	G	C	0.299529	13	23578231	1.35222e-26	114.83931604805	TNFRSF19
rs149677133	0.417367	0.0740874	G	A	0.0127547	19	13925319	1.83313e-08	31.7356579957302	IL27RA
rs35026308	-1.01263	0.0191315	T	C	0.163386	19	14042481	1e-200	2801.58326768181	IL27RA
rs4704819	-0.148715	0.0199196	A	G	0.222723	5	156906967	9.25527e-14	55.7376076862623	HAVCR2
rs6891966	0.755431	0.0176898	A	A	0.22813	5	157099320	1e-200	1823.65952634695	HAVCR2
rs140388519	0.190004	0.026231	G	A	0.109317	5	157552083	4.82631e-13	52.468155007152	HAVCR2
rs1994292	0.313902	0.0170329	C	T	0.349369	4	95521608	3.79078e-74	339.633853123933	UNC5C
rs11931784	-0.111809	0.0199011	C	T	0.22612	4	95573655	2.00124e-08	31.564532581426	UNC5C
rs987383	-0.201707	0.0220551	A	A	0.164703	4	95626201	7.58936e-20	83.6418977159906	UNC5C
rs149913197	-0.587524	0.0357235	G	C	0.0552475	4	158489497	1.07611e-59	270.485020976195	PPID
rs9918016	0.663292	0.0165715	G	A	0.294468	4	158700845	1e-200	1602.08618783722	PPID
rs601196	-0.15143	0.0171394	A	A	0.3676	4	159033092	1.23853e-18	78.0607313272265	PPID
rs1260326	-0.197844	0.0168361	T	T	0.406558	2	27508073	1.35064e-31	138.090173323663	GCKR
rs1053124	0.120469	0.0207683	T	T	0.200541	7	128501811	6.88623e-09	33.6471832534718	IMPDH1
rs11591147	-1.04454	0.0687454	G	T	0.0144877	1	55039974	2.39068e-51	230.867534372038	PCSK9
rs693668	-0.165634	0.0172284	G	G	0.356994	1	55055436	9.42032e-22	92.4291772489106	PCSK9
rs1046988	-0.592572	0.0157718	C	T	0.364273	1	39753393	1e-200	1411.62626582411	PPIE
rs12252016	-0.453721	0.0639377	T	A	0.0168446	10	79324912	1.40349e-12	50.3574513792496	PPIF
rs58583086	0.456714	0.0165724	A	A	0.37273	4	119635207	4.82419e-159	759.482611260256	PDE5A
rs143179501	-0.365053	0.0639112	C	A	0.0170525	4	119836365	1.1618e-08	32.625554356246	PDE5A
rs61751623	-0.295485	0.0391208	C	G	0.0478303	1	154965738	4.7725e-14	57.0499704626115	SHC1
rs8106212	0.38532	0.0701774	C	T	0.0142798	19	6802560	4.14078e-08	30.1473091979647	VAV1
rs36097961	-0.580725	0.0303145	C	T	0.0765285	19	6850756	7.985e-80	366.978166359573	VAV1
rs6505397	-0.147153	0.0168147	T	A	0.419104	17	34190977	2.59155e-18	76.5878705290368	CCL11
rs429358	0.299981	0.023212	T	C	0.14973	19	44908684	8.69554e-38	167.017651757505	APOE
rs35136575	-0.125203	0.0195489	C	G	0.232843	19	44935906	1.60248e-10	41.0189765518241	APOE
rs78807356	0.505516	0.0519699	G	T	0.0261334	11	46575120	3.16426e-22	94.6163193264379	F2
rs113954134	0.275843	0.0447637	G	A	0.0352142	11	47181131	7.55949e-10	37.9727440425894	F2
rs724781	-0.154398	0.0187673	C	G	0.266325	1	153363542	2.25878e-16	67.6830230356016	S100A9
rs6058227	-0.202066	0.0307108	C	T	0.0806183	20	35308144	5.04599e-11	43.2916590536867	CPNE1
rs2050729	-0.919494	0.0214825	A	A	0.135519	20	35706487	1e-200	1832.01134346887	CPNE1
rs3012384	0.101338	0.0171497	T	T	0.38694	6	170153137	3.59777e-09	34.9165722866708	DLL1
rs4710790	0.175398	0.0166574	A	C	0.427145	6	170279144	9.6805e-26	110.875309322817	DLL1
rs6728769	0.277154	0.0175425	T	T	0.307639	2	113050934	2.65775e-55	249.608477552094	IL1RN
[truncated: 876 more rows]

## Sheet: S2
FDR-corrected Mendelian randomization analysis
protein_name	method	nsnp	b	se	pval	fdr	significant
APOE	Inverse variance weighted	2	-0.155306	0.0309254268808047	5.11505981049434e-07	0.00028900087929293	FDR < 0.05
SIGLEC12	Inverse variance weighted	3	-0.00880124	0.0460536494108443	0.848440583734989	0.986512358813692	Not significant
APRT	Inverse variance weighted	2	0.104130580476733	0.0650773176027172	0.109575158394605	0.909017330508798	Not significant
TMEM190	Inverse variance weighted	2	0.0132509663547781	0.0133524862026252	0.321003934523752	0.986512358813692	Not significant
APOM	Inverse variance weighted	2	0.135763392915107	0.0389695444474541	0.000494287424638539	0.139636197460387	Not significant
PCDH9	Inverse variance weighted	2	0.0481373672456439	0.0434034188656572	0.267400606835397	0.986512358813692	Not significant
SLITRK3	Inverse variance weighted	2	-0.00354013	0.0184898029727866	0.84816216741498	0.986512358813692	Not significant
MSMB	Inverse variance weighted	3	0.0432515465398315	0.036712442874331	0.238750036430191	0.986512358813692	Not significant
ACE	Inverse variance weighted	2	0.00732486006500834	0.0100024881611249	0.46398316198775	0.986512358813692	Not significant
SMPD1	Inverse variance weighted	2	-0.00748443	0.0164406241226878	0.648936572525399	0.986512358813692	Not significant
B4GALT6	Inverse variance weighted	3	-0.0133959	0.0176275916274914	0.447292228340237	0.986512358813692	Not significant
EBI3	Inverse variance weighted	2	-0.0136816	0.0103615143372866	0.186693535591709	0.972741533926264	Not significant
PLA2R1	Inverse variance weighted	3	-0.0207942	0.0127976759777563	0.104196643769219	0.909017330508798	Not significant
UCMA	Inverse variance weighted	2	-0.0170443	0.0281276504563433	0.544538613128895	0.986512358813692	Not significant
CHI3L1	Inverse variance weighted	3	0.00672958135737852	0.0247167470151659	0.785415894656038	0.986512358813692	Not significant
SVEP1	Inverse variance weighted	3	-0.0248397	0.019833199686724	0.210413448265079	0.986512358813692	Not significant
SPATA20	Inverse variance weighted	3	-0.00382902	0.0144233404153462	0.790644316865024	0.986512358813692	Not significant
KIAA1549L	Inverse variance weighted	2	0.00795579373045739	0.0132506162831361	0.548233467035954	0.986512358813692	Not significant
SVEP1	Inverse variance weighted	2	-0.0265156	0.014919567470739	0.075529811285089	0.909017330508798	Not significant
NAGPA	Inverse variance weighted	2	-0.0123528	0.0172960044341059	0.475102700038078	0.986512358813692	Not significant
TXNDC5	Inverse variance weighted	3	-0.0133341	0.0272398473123066	0.624482199362432	0.986512358813692	Not significant
FGFBP3	Inverse variance weighted	2	-0.00208778	0.0146159573835703	0.886414774622535	0.986512358813692	Not significant
QDPR	Inverse variance weighted	2	-0.00412755	0.0143333677281581	0.77337127223895	0.986512358813692	Not significant
COL11A2	Inverse variance weighted	3	-0.0152548	0.0182558895944751	0.40337388949448	0.986512358813692	Not significant
NT5C2	Inverse variance weighted	2	0.0445944450984942	0.0388982528818433	0.251613862226002	0.986512358813692	Not significant
ATF6B	Inverse variance weighted	3	-0.0124453	0.0336562822758607	0.711549029717005	0.986512358813692	Not significant
FAH	Inverse variance weighted	2	0.00980742860163664	0.0135265395278373	0.468420852685249	0.986512358813692	Not significant
FKBP1B	Inverse variance weighted	2	0.0271200314915975	0.0145865539383299	0.062991894340176	0.909017330508798	Not significant
CHST9	Inverse variance weighted	2	0.0377357598747629	0.0347156437064358	0.277038653487696	0.986512358813692	Not significant
SMAP1	Inverse variance weighted	3	-0.00507613	0.0166109176523735	0.759916939803774	0.986512358813692	Not significant
CRABP2	Inverse variance weighted	2	0.020426878492807	0.0263281679409581	0.437833758358452	0.986512358813692	Not significant
RNPEP	Inverse variance weighted	2	-0.00549824	0.0144706024540228	0.70397586651115	0.986512358813692	Not significant
DARS2	Inverse variance weighted	2	-0.000157044	0.026554299875279	0.995281280278219	0.99704596339928	Not significant
HIBCH	Inverse variance weighted	3	0.0227195039732903	0.0150725457275656	0.131722630525325	0.909017330508798	Not significant
GSTO1	Inverse variance weighted	3	0.00333205281636022	0.023252189636183	0.886052778929066	0.986512358813692	Not significant
MAPRE1	Inverse variance weighted	2	-0.00933017	0.0158816499289366	0.556880405296743	0.986512358813692	Not significant
CLIC5	Inverse variance weighted	2	-0.045134	0.0286839991964374	0.115605269736398	0.909017330508798	Not significant
GLRX2	Inverse variance weighted	2	-0.0160356	0.0358488059211674	0.654650733184057	0.986512358813692	Not significant
PDCD5	Inverse variance weighted	3	0.000889560091811146	0.011551817094515	0.938618712290503	0.986512358813692	Not significant
HPGDS	Inverse variance weighted	2	-0.00212507	0.0135248276901676	0.875147319913025	0.986512358813692	Not significant
ARL3	Inverse variance weighted	3	-0.00721141	0.0165205612419006	0.662465983043831	0.986512358813692	Not significant
ACYP2	Inverse variance weighted	2	-0.0242328	0.0183926517479934	0.187661641058341	0.972741533926264	Not significant
S100A6	Inverse variance weighted	2	-0.0228704	0.035496591607151	0.519382663649359	0.986512358813692	Not significant
REG1A	Inverse variance weighted	2	0.173196119038324	0.0542343674784427	0.00140571308125675	0.264742630303354	Not significant
NEGR1	Inverse variance weighted	2	-0.0354588	0.118274256035109	0.764328438357281	0.986512358813692	Not significant
LUM	Inverse variance weighted	4	0.0151675633488819	0.0302432060429889	0.616005423299256	0.986512358813692	Not significant
CD177	Inverse variance weighted	5	-0.0108253	0.0097578117900113	0.26725781001529	0.986512358813692	Not significant
SMOC1	Inverse variance weighted	2	0.0705506973009456	0.0564751121782101	0.211579065828555	0.986512358813692	Not significant
SERPINA10	Inverse variance weighted	2	0.0271225986860549	0.010728476275709	0.0114683575789912	0.647962203213003	Not significant
FLRT2	Inverse variance weighted	2	0.0155026375549952	0.0142307350827504	0.275987605807788	0.986512358813692	Not significant
FLRT3	Inverse variance weighted	3	0.0110898788387829	0.0219271995392316	0.613025833627881	0.986512358813692	Not significant
DSC2	Inverse variance weighted	2	0.022110437993905	0.0715906938986525	0.757439328586989	0.986512358813692	Not significant
SEMA5A	Inverse variance weighted	2	-0.0156974	0.0273704950167136	0.566295848564729	0.986512358813692	Not significant
PCSK1	Inverse variance weighted	3	-0.0130221	0.0116539884250498	0.263824944794264	0.986512358813692	Not significant
TMEM132D	Inverse variance weighted	2	-0.0381901	0.0410500705548065	0.352200051398766	0.986512358813692	Not significant
HDHD2	Inverse variance weighted	2	0.000566765738576183	0.00925845140777842	0.951187155027123	0.989277442380806	Not significant
SWAP70	Inverse variance weighted	2	0.0947335815306719	0.0527725307810892	0.072632904422966	0.909017330508798	Not significant
REXO2	Inverse variance weighted	2	-0.0573422	0.0896484577649733	0.522410373800767	0.986512358813692	Not significant
NCK2	Inverse variance weighted	2	0.0538350127247624	0.0363953438465764	0.139094063336365	0.909017330508798	Not significant
CA10	Inverse variance weighted	2	-0.0105447	0.0194913097769939	0.588511150302457	0.986512358813692	Not significant
ELANE	Inverse variance weighted	2	-0.0173702	0.0459871351709879	0.705640115313597	0.986512358813692	Not significant
CSF1R	Inverse variance weighted	2	-0.0119378	0.0486070012054852	0.805993781311355	0.986512358813692	Not significant
IL5RA	Inverse variance weighted	2	-0.0461686	0.0232030512801894	0.0466169170643294	0.866955990561085	Not significant
FCN2	Inverse variance weighted	2	0.00122195060278167	0.0113238346449876	0.91406739238287	0.986512358813692	Not significant
FRZB	Inverse variance weighted	3	0.0249255885114565	0.0218708498689336	0.254423104267094	0.986512358813692	Not significant
CCL8	Inverse variance weighted	2	-0.0039061	0.0124951880928394	0.754578097521311	0.986512358813692	Not significant
TOLLIP	Inverse variance weighted	2	-0.0479045	0.0429679014261481	0.264896947313595	0.986512358813692	Not significant
CRYZ	Inverse variance weighted	3	0.0173273325163006	0.0156802274813069	0.269140766621084	0.986512358813692	Not significant
IL1RAP	Inverse variance weighted	3	-0.00252544	0.0455664482649264	0.955801259702256	0.989277442380806	Not significant
IL15RA	Inverse variance weighted	4	-0.00598351	0.0128577790012904	0.6416727575957	0.986512358813692	Not significant
C1QC	Inverse variance weighted	5	0.00696599741364552	0.0161361982650204	0.665959439373563	0.986512358813692	Not significant
CNTFR	Inverse variance weighted	3	0.0156951907494546	0.0148825800501508	0.291607632709086	0.986512358813692	Not significant
MTHFS	Inverse variance weighted	3	-0.015054	0.0167275809231672	0.368146773492412	0.986512358813692	Not significant
C10orf54	Inverse variance weighted	2	0.00111570889166688	0.0167477832721352	0.946885574851688	0.987067066035431	Not significant
EFNB2	Inverse variance weighted	2	0.00466435766411711	0.0409989470349943	0.909421909991547	0.986512358813692	Not significant
YWHAB	Inverse variance weighted	2	0.00961542945354713	0.0112287097221365	0.391817810114311	0.986512358813692	Not significant
RBP7	Inverse variance weighted	2	0.0204410540017681	0.0400539355752427	0.609814534008638	0.986512358813692	Not significant
PREP	Inverse variance weighted	3	0.00979655857088527	0.0129463863133636	0.449228316601453	0.986512358813692	Not significant
SUMO3	Inverse variance weighted	2	0.0227007063122481	0.0354494301228895	0.521932911561687	0.986512358813692	Not significant
CAPN2	Inverse variance weighted	2	-0.0177163	0.0252178561995343	0.482348882430217	0.986512358813692	Not significant
CCDC134	Inverse variance weighted	3	0.0138964693158379	0.0201287409061543	0.489955588913601	0.986512358813692	Not significant
REG3A	Inverse variance weighted	2	-0.00520572	0.031811220674279	0.87001128049162	0.986512358813692	Not significant
VWC2	Inverse variance weighted	6	0.00370118435401254	0.0228821121107264	0.871502635017062	0.986512358813692	Not significant
CLIC4	Inverse variance weighted	2	0.0395254895726718	0.023939393922333	0.098725353017101	0.909017330508798	Not significant
GBP1	Inverse variance weighted	2	0.00416713982037894	0.037579118191882	0.911703756929379	0.986512358813692	Not significant
KNG1	Inverse variance weighted	2	0.0135357669147971	0.0232735375244401	0.560839689393599	0.986512358813692	Not significant
BMPER	Inverse variance weighted	3	0.0162478269697392	0.036187978421445	0.653443125650698	0.986512358813692	Not significant
CPB1	Inverse variance weighted	2	-0.0197106	0.0246503656447765	0.423939152921439	0.986512358813692	Not significant
KL	Inverse variance weighted	2	0.0220820583418133	0.0709564020351481	0.755644018916313	0.986512358813692	Not significant
FABP2	Inverse variance weighted	3	-0.0137945	0.0262291181359546	0.598941249506836	0.986512358813692	Not significant
NRP2	Inverse variance weighted	2	0.0185839953877006	0.0296790239070127	0.531206072212338	0.986512358813692	Not significant
FCGR3A	Inverse variance weighted	3	0.0150574082112855	0.0136468339874442	0.269869668428363	0.986512358813692	Not significant
UNC5B	Inverse variance weighted	2	0.0525215773679118	0.0383002275840899	0.170277588932959	0.952542947991307	Not significant
GSTM1	Inverse variance weighted	3	-0.0207628	0.0137944283792519	0.132283768595991	0.909017330508798	Not significant
PNP	Inverse variance weighted	2	-0.00645242	0.0142518338502631	0.650733630855298	0.986512358813692	Not significant
GM2A	Inverse variance weighted	3	-0.0149035	0.0168968451060595	0.377761897186542	0.986512358813692	Not significant
HEXB	Inverse variance weighted	2	0.0210524804576636	0.0169998743635442	0.21557135498034	0.986512358813692	Not significant
PNLIPRP2	Inverse variance weighted	2	-0.0137617	0.0486182818709817	0.777133106443971	0.986512358813692	Not significant
LRP11	Inverse variance weighted	3	0.00741081508019639	0.0105136612204096	0.480888140204984	0.986512358813692	Not significant
PLTP	Inverse variance weighted	3	-0.00427029	0.0136212111456428	0.753898771234041	0.986512358813692	Not significant
REG3G	Inverse variance weighted	2	-0.00593136	0.0137578280266992	0.666376518850042	0.986512358813692	Not significant
VNN2	Inverse variance weighted	3	0.000951671467420728	0.0100011726603911	0.924190927645701	0.986512358813692	Not significant
AOC1	Inverse variance weighted	2	-0.0842121	0.0452384493532321	0.062671458442483	0.909017330508798	Not significant
CES1	Inverse variance weighted	2	0.0197862921445404	0.0342697162028925	0.563689809573554	0.986512358813692	Not significant
ATRN	Inverse variance weighted	3	-0.0182573	0.0141931905919443	0.198323481413194	0.986512358813692	Not significant
NAGLU	Inverse variance weighted	3	0.00111367607956381	0.0112054780569879	0.920831200285357	0.986512358813692	Not significant
NPTXR	Inverse variance weighted	2	0.0204684707679103	0.0101588419605888	0.0439211106614595	0.866955990561085	Not significant
BCHE	Inverse variance weighted	3	-0.0337012	0.0204789635133598	0.0998363079790276	0.909017330508798	Not significant
SAA1	Inverse variance weighted	2	-0.023543	0.0149773247732198	0.115971156684891	0.909017330508798	Not significant
SAA4	Inverse variance weighted	2	-0.0221857	0.0179609536495542	0.216749378791539	0.986512358813692	Not significant
CLSTN1	Inverse variance weighted	2	-0.0076742	0.050823906701007	0.879978929718801	0.986512358813692	Not significant
GLIPR2	Inverse variance weighted	2	-0.020683	0.023285705302216	0.374417842088818	0.986512358813692	Not significant
ALAD	Inverse variance weighted	3	-0.00852741	0.0183058608858821	0.641337456843853	0.986512358813692	Not significant
MSR1	Inverse variance weighted	2	0.0190734244220599	0.0258327105325436	0.460305491627424	0.986512358813692	Not significant
KLK14	Inverse variance weighted	3	0.0442073640503098	0.0276941055334698	0.110427765810893	0.909017330508798	Not significant
AMY2B	Inverse variance weighted	4	-0.00503247	0.0178638950648155	0.77816464924924	0.986512358813692	Not significant
ENPEP	Inverse variance weighted	3	-0.0236246	0.0222571242154331	0.288490081139618	0.986512358813692	Not significant
ANTXR2	Inverse variance weighted	2	-0.0029369	0.0205455900853273	0.886333095888897	0.986512358813692	Not significant
TCN2	Inverse variance weighted	3	0.0247578567470556	0.0413588565227763	0.549432475669186	0.986512358813692	Not significant
CR2	Inverse variance weighted	2	-0.0985948	0.0488896529923245	0.0437289325670417	0.866955990561085	Not significant
RNASE3	Inverse variance weighted	3	0.0351066973679022	0.0193192847352126	0.0691889261739669	0.909017330508798	Not significant
FCN1	Inverse variance weighted	2	-0.00234042	0.012985166904164	0.856965852948836	0.986512358813692	Not significant
CFHR2	Inverse variance weighted	3	0.0078297593065902	0.0123933530114468	0.527536616629853	0.986512358813692	Not significant
IL6R	Inverse variance weighted	3	0.0120491966778164	0.00775919494787137	0.120448786931568	0.909017330508798	Not significant
LILRB3	Inverse variance weighted	4	-0.0072715	0.027907289683452	0.794432583205319	0.986512358813692	Not significant
SMOC2	Inverse variance weighted	3	0.0147569680190839	0.0256879441228162	0.565649407168489	0.986512358813692	Not significant
BTD	Inverse variance weighted	3	-0.00904131	0.0108380625617147	0.404158141183809	0.986512358813692	Not significant
COL10A1	Inverse variance weighted	2	0.0323921353038706	0.0244394193031364	0.185036767809802	0.972741533926264	Not significant
CFHR5	Inverse variance weighted	2	0.0351956947410686	0.0174181452491516	0.0433176771222785	0.866955990561085	Not significant
IGF2R	Inverse variance weighted	3	0.0110401786098969	0.012524767197006	0.378064691149002	0.986512358813692	Not significant
EPHA4	Inverse variance weighted	2	0.00491937655026695	0.0233381136657145	0.833053296392636	0.986512358813692	Not significant
LGR5	Inverse variance weighted	2	0.0595000985787416	0.0394201394941566	0.13120086900874	0.909017330508798	Not significant
UNC5D	Inverse variance weighted	2	-0.0530561	0.0248594073905834	0.0328226767904313	0.866955990561085	Not significant
TLR1	Inverse variance weighted	2	0.0231140254560268	0.0438233233587083	0.597890420376108	0.986512358813692	Not significant
NUDT2	Inverse variance weighted	2	0.000280145784947	0.0210810336422107	0.989397226834773	0.996681256813588	Not significant
C1QTNF9	Inverse variance weighted	2	-0.00520054	0.0330976303693556	0.875144652721848	0.986512358813692	Not significant
CDH17	Inverse variance weighted	2	0.00390741750295395	0.0184509023916979	0.832283518369562	0.986512358813692	Not significant
RSPO1	Inverse variance weighted	2	-0.00808587	0.0284925584962796	0.776572159846087	0.986512358813692	Not significant
LY75	Inverse variance weighted	2	-0.00434972	0.0120740440856705	0.718657404031611	0.986512358813692	Not significant
COL6A2	Inverse variance weighted	3	-0.00619375	0.0198600888101538	0.755139978182806	0.986512358813692	Not significant
HDGF	Inverse variance weighted	2	-0.0315927	0.0120870430912697	0.00895509426289637	0.647962203213003	Not significant
LECT2	Inverse variance weighted	2	-0.0542554	0.0582957158754504	0.352012582645153	0.986512358813692	Not significant
REG1B	Inverse variance weighted	2	-0.0352796	0.047321600956285	0.455952075902044	0.986512358813692	Not significant
ENGASE	Inverse variance weighted	4	0.00247227370873373	0.0156153276726149	0.874201872283139	0.986512358813692	Not significant
SIGLEC5	Inverse variance weighted	4	0.0087037237011345	0.00953762621944831	0.361470275171442	0.986512358813692	Not significant
PDE5A	Inverse variance weighted	2	-0.00213953	0.0436367210358444	0.960894989226082	0.989277442380806	Not significant
NME4	Inverse variance weighted	2	-0.0164053	0.033371012390733	0.623000842881035	0.986512358813692	Not significant
CDCP1	Inverse variance weighted	2	-0.00811461	0.0202165729627975	0.688137237434378	0.986512358813692	Not significant
ATXN3	Inverse variance weighted	3	0.0125678181790277	0.0133843404160477	0.347733716167608	0.986512358813692	Not significant
COL6A1	Inverse variance weighted	4	-0.0204284	0.0105129711692335	0.0519970123950156	0.909017330508798	Not significant
GSTZ1	Inverse variance weighted	4	-0.00133863	0.010936815431265	0.902584719396264	0.986512358813692	Not significant
MDGA1	Inverse variance weighted	2	0.00267321495604342	0.0588227768380456	0.96375242536252	0.989277442380806	Not significant
RNASET2	Inverse variance weighted	2	0.0171709550130744	0.0272063057312267	0.527949776865716	0.986512358813692	Not significant
CD14	Inverse variance weighted	2	0.0174733325151121	0.0236881810197464	0.460733686312132	0.986512358813692	Not significant
TLR3	Inverse variance weighted	2	0.008828610428577	0.0106933120630324	0.409019785796201	0.986512358813692	Not significant
DBI	Inverse variance weighted	2	0.00824029389299384	0.0371446543437375	0.824435845594701	0.986512358813692	Not significant
PDGFD	Inverse variance weighted	2	-0.0162926	0.0268953738979808	0.544662111295513	0.986512358813692	Not significant
IRF3	Inverse variance weighted	2	0.0315578036159121	0.0169812881199992	0.0631140893279535	0.909017330508798	Not significant
KIR2DL3	Inverse variance weighted	2	0.0181052013300499	0.0619488104758276	0.770087321581787	0.986512358813692	Not significant
BDH2	Inverse variance weighted	2	0.0136990777900123	0.034487969241585	0.691210224100743	0.986512358813692	Not significant
STARD5	Inverse variance weighted	2	-0.000539226	0.0302863162729745	0.985794996231911	0.996375980091287	Not significant
ADH1A	Inverse variance weighted	2	0.00938569394059059	0.0387331447584189	0.808534652119769	0.986512358813692	Not significant
GOLM1	Inverse variance weighted	2	-0.0269885	0.0305356101163192	0.376783936088439	0.986512358813692	Not significant
ANXA11	Inverse variance weighted	2	0.00159620667884769	0.0116408229256233	0.890934787093254	0.986512358813692	Not significant
TRIP10	Inverse variance weighted	4	0.0483213219660045	0.0343607146705362	0.159636365190339	0.938010597440776	Not significant
EPHB1	Inverse variance weighted	2	-0.0032139	0.0180182569901132	0.858433312359449	0.986512358813692	Not significant
TBCB	Inverse variance weighted	2	-0.016622	0.0182521368893361	0.362459050822483	0.986512358813692	Not significant
BTN3A3	Inverse variance weighted	2	-0.0267933	0.0144038070647485	0.0628638349121476	0.909017330508798	Not significant
OVCA2	Inverse variance weighted	2	-0.0153965	0.0159081319662704	0.333124665609974	0.986512358813692	Not significant
UGT1A1	Inverse variance weighted	2	-0.00742898	0.0122219332841549	0.543293722548171	0.986512358813692	Not significant
FKBP4	Inverse variance weighted	2	-0.0113888	0.0274016404430266	0.677684836875466	0.986512358813692	Not significant
TP53I3	Inverse variance weighted	3	-0.00776054	0.0130070568127117	0.550747121250022	0.986512358813692	Not significant
SNUPN	Inverse variance weighted	2	0.00204716732448462	0.0232532539331537	0.929846564167361	0.986512358813692	Not significant
NCF1	Inverse variance weighted	2	0.0384608335874375	0.0151394423286308	0.0110713323999853	0.647962203213003	Not significant
MMAB	Inverse variance weighted	2	-0.0198439	0.0169674415182241	0.242191642181444	0.986512358813692	Not significant
PGLS	Inverse variance weighted	2	0.00282278946605325	0.0391576015815376	0.942531951528941	0.986512358813692	Not significant
NANS	Inverse variance weighted	2	-0.00528852	0.0417563126042358	0.89921587221947	0.986512358813692	Not significant
NMT2	Inverse variance weighted	2	0.0377873525032955	0.0290455202428626	0.19326869972114	0.986512358813692	Not significant
IDI2	Inverse variance weighted	2	-0.0121361	0.0257188699027162	0.637015751761122	0.986512358813692	Not significant
S100A16	Inverse variance weighted	2	0.0451556067308509	0.143558492670891	0.753107140924159	0.986512358813692	Not significant
AKR7A3	Inverse variance weighted	4	0.00895975289252066	0.0152499457279452	0.556849909215841	0.986512358813692	Not significant
PDCD6IP	Inverse variance weighted	3	-0.00600216	0.0181003284443283	0.740187668105008	0.986512358813692	Not significant
TARS	Inverse variance weighted	2	0.0480778129168827	0.0383513739816142	0.209982401025847	0.986512358813692	Not significant
ADH6	Inverse variance weighted	2	0.0339950345667971	0.0150890497654551	0.0242616335188404	0.866955990561085	Not significant
CNRIP1	Inverse variance weighted	4	0.000615128837035164	0.0146531933471084	0.966515306538416	0.989277442380806	Not significant
SH3GLB2	Inverse variance weighted	2	0.00703942153799915	0.0159221785426016	0.658406555265216	0.986512358813692	Not significant
HEBP1	Inverse variance weighted	2	0.018899626076138	0.0131641545405007	0.151090981943641	0.914556653925054	Not significant
PGP	Inverse variance weighted	2	0.0453100652185998	0.0247156081435637	0.066764339269572	0.909017330508798	Not significant
DTD2	Inverse variance weighted	3	-0.00473173	0.0202657429022402	0.815385402982667	0.986512358813692	Not significant
CCL15	Inverse variance weighted	2	0.0135686755354781	0.0101393403106184	0.180824488819369	0.971946014205344	Not significant
GRHPR	Inverse variance weighted	2	0.0118915209599462	0.0198676500434938	0.549481768852145	0.986512358813692	Not significant
PSMB4	Inverse variance weighted	2	0.0242906216769673	0.0674705582376798	0.718833603649193	0.986512358813692	Not significant
ARF4	Inverse variance weighted	2	0.0003104227132598	0.0847687818170246	0.997078158593902	0.997078158593902	Not significant
LRIG1	Inverse variance weighted	3	0.00317599815393436	0.0121856438835208	0.794374448056824	0.986512358813692	Not significant
SAA2	Inverse variance weighted	2	-0.0330496	0.0205819244820881	0.108326636666931	0.909017330508798	Not significant
PRSS3	Inverse variance weighted	2	0.0189899271529344	0.0133677789416569	0.155440468514192	0.924461733794929	Not significant
AIF1L	Inverse variance weighted	2	-0.0117228	0.0150010816246214	0.434527897292948	0.986512358813692	Not significant
GREM1	Inverse variance weighted	3	0.00361130645477952	0.0100118681322014	0.718321811586008	0.986512358813692	Not significant
GSTM4	Inverse variance weighted	2	-0.00270222	0.0181777341204095	0.881825441725503	0.986512358813692	Not significant
ITPA	Inverse variance weighted	4	0.0271883745995051	0.0153096795696263	0.0757503199956513	0.909017330508798	Not significant
AMY2A	Inverse variance weighted	3	-0.00551216	0.0153253435412739	0.719089453643884	0.986512358813692	Not significant
SERPINB8	Inverse variance weighted	2	0.014307102704623	0.0637747376942874	0.822494241587035	0.986512358813692	Not significant
USP15	Inverse variance weighted	3	0.00720842107955684	0.0247474806035302	0.770837957023559	0.986512358813692	Not significant
DTD1	Inverse variance weighted	2	-0.00223152	0.0121759782235147	0.854584366316295	0.986512358813692	Not significant
GMPR	Inverse variance weighted	2	-0.00775665	0.0080712296347061	0.33653980452115	0.986512358813692	Not significant
HAGH	Inverse variance weighted	2	-0.00272594	0.0329143415084008	0.933995303300171	0.986512358813692	Not significant
TSTD1	Inverse variance weighted	2	0.00554003414743794	0.0350604013836361	0.874445769530998	0.986512358813692	Not significant
UROD	Inverse variance weighted	2	-0.00522308	0.0132194778411724	0.692765774372048	0.986512358813692	Not significant
MATN3	Inverse variance weighted	2	-0.00306453	0.0598443771094991	0.959159456830671	0.989277442380806	Not significant
MDGA2	Inverse variance weighted	2	-0.0462746	0.031247666874029	0.138634081610951	0.909017330508798	Not significant
OLFM2	Inverse variance weighted	2	0.00300513264564241	0.00912955780743119	0.742030831235141	0.986512358813692	Not significant
PDCD6	Inverse variance weighted	2	0.0809303559238016	0.118364852721735	0.494141646484408	0.986512358813692	Not significant
DTYMK	Inverse variance weighted	3	0.0405966232195012	0.0280116783904519	0.147260819558231	0.914311681872536	Not significant
PARK7	Inverse variance weighted	3	0.0139595323206455	0.0125092329167973	0.264448539071515	0.986512358813692	Not significant
CR1	Inverse variance weighted	2	0.0149464786231941	0.0498189284451802	0.764164905510967	0.986512358813692	Not significant
PLXNA4	Inverse variance weighted	2	-0.0300106	0.0355516642822615	0.398590525607124	0.986512358813692	Not significant
PLXND1	Inverse variance weighted	3	0.00825927999109627	0.033851693938553	0.807243021843261	0.986512358813692	Not significant
SEZ6L	Inverse variance weighted	2	-0.0398353	0.0475311141253166	0.401981317182386	0.986512358813692	Not significant
DOK2	Inverse variance weighted	2	0.02531826401162	0.0314543286158204	0.420865005602738	0.986512358813692	Not significant
SFTPD	Inverse variance weighted	2	0.00883116162220783	0.0140140821292886	0.528587683623317	0.986512358813692	Not significant
TCN1	Inverse variance weighted	3	-0.0104563	0.0251539239817927	0.677634006278486	0.986512358813692	Not significant
PTGR1	Inverse variance weighted	6	0.0242905597582401	0.0151649280764191	0.10920891668094	0.909017330508798	Not significant
F11	Inverse variance weighted	3	-0.00358337	0.0164308480394802	0.827360771091474	0.986512358813692	Not significant
COL18A1	Inverse variance weighted	2	0.041178923650166	0.0271957328884029	0.129983094043334	0.909017330508798	Not significant
APCS	Inverse variance weighted	2	-0.0035592	0.0179020776414576	0.842407439241221	0.986512358813692	Not significant
TIMP3	Inverse variance weighted	2	-0.0450726	0.0424037657771831	0.287809623082948	0.986512358813692	Not significant
GFRA2	Inverse variance weighted	4	0.0503343890747016	0.0189550241464493	0.00791993266194252	0.647962203213003	Not significant
IGFBP3	Inverse variance weighted	2	0.0200105143056324	0.0199978353276412	0.317003777771764	0.986512358813692	Not significant
ROR1	Inverse variance weighted	2	-0.00909049	0.012317763938933	0.460515437407882	0.986512358813692	Not significant
CST3	Inverse variance weighted	2	0.00982644587906011	0.0142749087165745	0.491218621467104	0.986512358813692	Not significant
IL6ST	Inverse variance weighted	2	0.0137610605538628	0.0167466501336536	0.411236164739977	0.986512358813692	Not significant
IL10RB	Inverse variance weighted	2	0.0128006571135785	0.0297454981767709	0.666948837036931	0.986512358813692	Not significant
MRC1	Inverse variance weighted	3	0.0668884938356167	0.029685138977532	0.0242424257416951	0.866955990561085	Not significant
PLAUR	Inverse variance weighted	2	0.0162005049150055	0.0235081036918993	0.490731681536128	0.986512358813692	Not significant
NTRK3	Inverse variance weighted	2	-0.000492513	0.0238496056797785	0.983524215421891	0.996375980091287	Not significant
EGFR	Inverse variance weighted	2	-0.0438728	0.0730907654610398	0.548339254177092	0.986512358813692	Not significant
MIA	Inverse variance weighted	3	0.00206971053248285	0.0250396806678285	0.934124097503101	0.986512358813692	Not significant
PLA2G2A	Inverse variance weighted	3	-0.0192113	0.0126707665395398	0.129471904476562	0.909017330508798	Not significant
PROS1	Inverse variance weighted	2	-0.044108	0.0538816292346081	0.413009115817415	0.986512358813692	Not significant
CCL25	Inverse variance weighted	2	-0.00411841	0.0106034217785769	0.697716913487216	0.986512358813692	Not significant
MICA	Inverse variance weighted	3	0.0173757387320139	0.0289671898815684	0.548611502211923	0.986512358813692	Not significant
SIGLEC6	Inverse variance weighted	2	0.00798532249806148	0.0290660296727132	0.783523359420678	0.986512358813692	Not significant
IL16	Inverse variance weighted	3	-0.00773706	0.0131194958898908	0.555366567384064	0.986512358813692	Not significant
CCL3L1	Inverse variance weighted	2	0.0229971600910738	0.0208859369701913	0.270860327719025	0.986512358813692	Not significant
MMP7	Inverse variance weighted	2	0.0066167684963151	0.0168308904934895	0.694221689586279	0.986512358813692	Not significant
AGRP	Inverse variance weighted	2	-0.0160158	0.0270296281463148	0.55349705115338	0.986512358813692	Not significant
BCAM	Inverse variance weighted	2	0.0424396252415573	0.0213908322166363	0.0472547240303054	0.866955990561085	Not significant
SPINT2	Inverse variance weighted	4	0.0196665417934302	0.0117498956612434	0.094177166933004	0.909017330508798	Not significant
AIF1	Inverse variance weighted	2	0.0769473714035794	0.0495524383503658	0.120459613207418	0.909017330508798	Not significant
C7	Inverse variance weighted	5	0.00882962584263478	0.0105304292490441	0.401757362470149	0.986512358813692	Not significant
CCL14	Inverse variance weighted	3	-0.00410101	0.0165268566569335	0.804024201472297	0.986512358813692	Not significant
CCL23	Inverse variance weighted	2	-0.0277863	0.0564401195559972	0.622496899696948	0.986512358813692	Not significant
NBL1	Inverse variance weighted	2	-0.0202851	0.0357017480054233	0.569911728290485	0.986512358813692	Not significant
CNTN1	Inverse variance weighted	3	0.0406453016988168	0.0215366840169058	0.059125492153191	0.909017330508798	Not significant
EDAR	Inverse variance weighted	2	0.0267015993355422	0.0198893539480839	0.179431622570112	0.971946014205344	Not significant
LGALS4	Inverse variance weighted	2	-0.0103718	0.0235786442382514	0.660022874566204	0.986512358813692	Not significant
CXCL1	Inverse variance weighted	3	-0.00202931	0.0139009120901862	0.883934080606109	0.986512358813692	Not significant
IL17RA	Inverse variance weighted	3	0.0105099903545114	0.0104971021380335	0.316716695100825	0.986512358813692	Not significant
NCR3	Inverse variance weighted	2	-0.0134843	0.0538723976077117	0.802355429554814	0.986512358813692	Not significant
PDCD1LG2	Inverse variance weighted	3	0.000953622724020126	0.0130864071591451	0.941908579797695	0.986512358813692	Not significant
SIGLEC9	Inverse variance weighted	2	-0.072722	0.0485117257588046	0.133857880939567	0.909017330508798	Not significant
TGFBR3	Inverse variance weighted	2	0.0765607660949395	0.0594865375725588	0.198084958900583	0.986512358813692	Not significant
CCL23	Inverse variance weighted	3	-0.0279462	0.0287553141641102	0.3311197459931	0.986512358813692	Not significant
CD209	Inverse variance weighted	2	-0.00194843	0.0189718067067088	0.918200213163311	0.986512358813692	Not significant
CCL3	Inverse variance weighted	2	0.0193720871348888	0.0163726078461724	0.236729468727711	0.986512358813692	Not significant
MRC2	Inverse variance weighted	2	0.0326803014141281	0.0200596593231548	0.103280135249882	0.909017330508798	Not significant
SPARC	Inverse variance weighted	2	0.00556372808026364	0.0479705576739543	0.907666694092282	0.986512358813692	Not significant
CCL18	Inverse variance weighted	3	0.017929944890667	0.0122184379448654	0.142253723023195	0.909017330508798	Not significant
RETN	Inverse variance weighted	2	-0.0263205	0.0326832574990397	0.420634	0.986512358813692	Not significant
HP	Inverse variance weighted	2	0.00332122360277248	0.0306517637022186	0.913715344404889	0.986512358813692	Not significant
LGALS3	Inverse variance weighted	2	0.0251704183846693	0.0171205827300271	0.141511743669609	0.909017330508798	Not significant
LBP	Inverse variance weighted	4	0.00814186745367182	0.0131552015312417	0.535976568137137	0.986512358813692	Not significant
VEGFC	Inverse variance weighted	2	0.00970509462961687	0.0146361355369356	0.507272060856016	0.986512358813692	Not significant
TNFRSF1B	Inverse variance weighted	2	0.0711919165378322	0.0319164234458438	0.0257094183330208	0.866955990561085	Not significant
CD33	Inverse variance weighted	5	0.0189968125077902	0.0196425417010287	0.333481056443933	0.986512358813692	Not significant
ADAMTS5	Inverse variance weighted	3	-0.0045266	0.0132435700380755	0.73250419549869	0.986512358813692	Not significant
IDUA	Inverse variance weighted	3	-0.00807833	0.0120810043269212	0.50369934988902	0.986512358813692	Not significant
ARSB	Inverse variance weighted	2	0.0361331165248097	0.04883033305074	0.459316520590273	0.986512358813692	Not significant
NAAA	Inverse variance weighted	3	-0.0144297	0.0152195905000397	0.34307892932024	0.986512358813692	Not significant
ADAMTS13	Inverse variance weighted	3	-0.000798345	0.0153011194574472	0.958388777000418	0.989277442380806	Not significant
CTSS	Inverse variance weighted	3	0.00965281596633981	0.0140411181905833	0.491788015146775	0.986512358813692	Not significant
F7	Inverse variance weighted	4	0.00589607178888534	0.0107783367824007	0.584358	0.986512358813692	Not significant
C2	Inverse variance weighted	2	0.0267250669862808	0.164479175903727	0.870925528554033	0.986512358813692	Not significant
GP6	Inverse variance weighted	2	0.0149637214667596	0.0190321681176901	0.431730909164567	0.986512358813692	Not significant
GNLY	Inverse variance weighted	2	0.010724870108323	0.0125296110235707	0.392018834221795	0.986512358813692	Not significant
LYVE1	Inverse variance weighted	2	-0.0136303	0.0239413110209236	0.569137256445349	0.986512358813692	Not significant
ASAH2	Inverse variance weighted	2	-0.0283531	0.0185682181395921	0.126769141695248	0.909017330508798	Not significant
ACP5	Inverse variance weighted	2	0.0142776051119713	0.0219162176169701	0.514747647106932	0.986512358813692	Not significant
ACAN	Inverse variance weighted	2	-0.0195186	0.0375012021943612	0.602730469922751	0.986512358813692	Not significant
TGFBI	Inverse variance weighted	3	0.00992426407437179	0.0127934712321518	0.437909131880247	0.986512358813692	Not significant
CD109	Inverse variance weighted	3	-0.00543591	0.0160565047367537	0.734949844700788	0.986512358813692	Not significant
FCER2	Inverse variance weighted	2	0.0348130358954855	0.0232880625300498	0.134943779081066	0.909017330508798	Not significant
CD5L	Inverse variance weighted	2	0.0375069675937015	0.018644700847385	0.044254835515559	0.866955990561085	Not significant
CNTN2	Inverse variance weighted	4	0.00611065272511623	0.0237524278220284	0.796974716846502	0.986512358813692	Not significant
CNTN4	Inverse variance weighted	3	-0.0302622	0.01847603798506	0.101438746281629	0.909017330508798	Not significant
FCGR2A	Inverse variance weighted	5	-0.00996565	0.0120264882991053	0.407307076358953	0.986512358813692	Not significant
FCGR2B	Inverse variance weighted	3	0.0223600438514536	0.0253143480472531	0.377076759636518	0.986512358813692	Not significant
FCGR3B	Inverse variance weighted	2	0.0190382601884264	0.0174987531668419	0.276604776534785	0.986512358813692	Not significant
FCN2	Inverse variance weighted	2	-0.00102478	0.0146933033707517	0.944396755800201	0.986512358813692	Not significant
LRIG3	Inverse variance weighted	6	0.0129074195612439	0.0162895662780028	0.428142965214827	0.986512358813692	Not significant
LRP8	Inverse variance weighted	2	-0.0696347	0.0269386497377972	0.00973966006683033	0.647962203213003	Not significant
LY9	Inverse variance weighted	3	0.0148176517968453	0.0131911872962634	0.261310390051636	0.986512358813692	Not significant
MATN2	Inverse variance weighted	2	0.00219852523501051	0.0313949711215119	0.944171419263001	0.986512358813692	Not significant
NTN4	Inverse variance weighted	2	0.0439949048187248	0.0547481295731485	0.42163532640299	0.986512358813692	Not significant
THBS2	Inverse variance weighted	4	-0.00543048	0.0117560298154358	0.644130224323739	0.986512358813692	Not significant
THBS4	Inverse variance weighted	3	0.0202369834281064	0.0158988505579097	0.203068339232085	0.986512358813692	Not significant
CA6	Inverse variance weighted	2	0.0770042503939876	0.0633063995506968	0.223842532130307	0.986512358813692	Not significant
FETUB	Inverse variance weighted	3	0.013652890947008	0.0200013906285459	0.494861476314944	0.986512358813692	Not significant
IL17RD	Inverse variance weighted	2	-0.0243372	0.0130059450829901	0.0613121805377917	0.909017330508798	Not significant
TPSB2	Inverse variance weighted	3	-0.000903742	0.0113192865052584	0.936363790548636	0.986512358813692	Not significant
EPHA1	Inverse variance weighted	3	0.00538518926680371	0.0118192972326498	0.64865832594278	0.986512358813692	Not significant
SERPINA4	Inverse variance weighted	3	0.00386993602282155	0.0104720840872614	0.711719423738759	0.986512358813692	Not significant
PDGFRB	Inverse variance weighted	2	0.011048435896386	0.0146598624012561	0.451058158947499	0.986512358813692	Not significant
AGT	Inverse variance weighted	2	0.0252663447849877	0.02427517182371	0.297954115681398	0.986512358813692	Not significant
CAT	Inverse variance weighted	2	0.0195094738793217	0.0219809284801022	0.374775495188527	0.986512358813692	Not significant
CXCL6	Inverse variance weighted	2	0.0156363898492806	0.0145280792287837	0.281798704171145	0.986512358813692	Not significant
CPB2	Inverse variance weighted	2	0.0610220972623678	0.0308003864681644	0.0475674968272454	0.866955990561085	Not significant
ADIPOQ	Inverse variance weighted	3	0.00278794443003875	0.0238692048067514	0.907017836303976	0.986512358813692	Not significant
SERPINA1	Inverse variance weighted	5	0.0354424117460009	0.0172859106817038	0.0403289078067091	0.866955990561085	Not significant
CASP3	Inverse variance weighted	2	-0.00987872	0.0142803586218238	0.489082067439501	0.986512358813692	Not significant
CHIT1	Inverse variance weighted	2	-0.0238932	0.0196818913324095	0.224759017723363	0.986512358813692	Not significant
HGFAC	Inverse variance weighted	4	-0.0105461	0.0160101873591977	0.510080426327147	0.986512358813692	Not significant
LGMN	Inverse variance weighted	2	-0.0127622	0.0292996781051322	0.663146447751275	0.986512358813692	Not significant
KDR	Inverse variance weighted	4	-0.00542985	0.0138487403715401	0.694997437966868	0.986512358813692	Not significant
PLG	Inverse variance weighted	4	-0.00173894	0.0205834201796679	0.932672581585549	0.986512358813692	Not significant
EPHA5	Inverse variance weighted	2	-0.00759674	0.057926264810776	0.895660566201045	0.986512358813692	Not significant
NAGK	Inverse variance weighted	2	0.0139335077770563	0.0227028254848481	0.539390771068448	0.986512358813692	Not significant
BPI	Inverse variance weighted	4	-0.0222987	0.0138615141129159	0.107686679104593	0.909017330508798	Not significant
C6	Inverse variance weighted	3	-0.00149329	0.0214923341547811	0.944607409058774	0.986512358813692	Not significant
CFB	Inverse variance weighted	3	-0.00518285	0.0170129259891542	0.760638821050745	0.986512358813692	Not significant
NTF3	Inverse variance weighted	2	0.120206631692071	0.0517087178812184	0.0200886538147869	0.866955990561085	Not significant
PLG	Inverse variance weighted	2	-0.00379117	0.01835446385708	0.836359074663666	0.986512358813692	Not significant
SERPINA3	Inverse variance weighted	2	-0.0342052	0.0510945605604051	0.503208982210929	0.986512358813692	Not significant
TNC	Inverse variance weighted	2	0.00468055948038484	0.0112464201175413	0.677276708948792	0.986512358813692	Not significant
CFH	Inverse variance weighted	2	0.0257649868499936	0.0187798000885548	0.170078338506465	0.952542947991307	Not significant
AKR7A2	Inverse variance weighted	3	-0.004141	0.0219215142997251	0.850170443884355	0.986512358813692	Not significant
AKR1A1	Inverse variance weighted	3	0.0123320631951823	0.0084573355063532	0.144799220789012	0.909017330508798	Not significant
VTA1	Inverse variance weighted	2	0.00115323056138099	0.0264142985446136	0.965175958709925	0.989277442380806	Not significant
IL1RL1	Inverse variance weighted	2	0.00852985571249755	0.0212312591916435	0.687861182069866	0.986512358813692	Not significant
NME2	Inverse variance weighted	2	0.0068479182214273	0.0134432331079624	0.610475250409549	0.986512358813692	Not significant
SPON1	Inverse variance weighted	2	-0.0308767	0.0144548237537603	0.0326729003980687	0.866955990561085	Not significant
CLEC1B	Inverse variance weighted	2	-0.0166158	0.0192459419047561	0.387950688853311	0.986512358813692	Not significant
ICAM1	Inverse variance weighted	2	-0.00832192	0.0149635265881478	0.578110210216726	0.986512358813692	Not significant
GDF15	Inverse variance weighted	2	-0.00717874	0.0122526720875079	0.557948491983051	0.986512358813692	Not significant
ENTPD5	Inverse variance weighted	2	-0.0717894	0.0771427560181994	0.352058230053748	0.986512358813692	Not significant
FCRL3	Inverse variance weighted	2	0.00276893152935024	0.0952523539058386	0.976809217693622	0.996204346564795	Not significant
MFGE8	Inverse variance weighted	2	0.0124486779129773	0.0184700927997997	0.500316980603102	0.986512358813692	Not significant
SPARCL1	Inverse variance weighted	2	-0.0168343	0.0182411069031767	0.356070161216517	0.986512358813692	Not significant
SERPING1	Inverse variance weighted	3	-0.00992763	0.0114074498256372	0.38414954429433	0.986512358813692	Not significant
MMP12	Inverse variance weighted	2	0.00222570695645496	0.0126362555387488	0.860186635890418	0.986512358813692	Not significant
NCAM1	Inverse variance weighted	2	-0.0451928	0.03059710810663	0.139668101334395	0.909017330508798	Not significant
BST1	Inverse variance weighted	3	0.00452065332231256	0.00877310344320614	0.606353503772895	0.986512358813692	Not significant
CDON	Inverse variance weighted	2	0.0085831860475546	0.0107142855359263	0.423075274155974	0.986512358813692	Not significant
FUT3	Inverse variance weighted	2	-0.00675556	0.0236214787245833	0.774884164780236	0.986512358813692	Not significant
FUT5	Inverse variance weighted	2	-0.00699899	0.0138087667553577	0.612258999332218	0.986512358813692	Not significant
KYNU	Inverse variance weighted	2	0.010779833282993	0.0114185603689659	0.345137771976187	0.986512358813692	Not significant
PLXNC1	Inverse variance weighted	2	0.00737542715550056	0.0134687978225221	0.583971001817164	0.986512358813692	Not significant
EPB41	Inverse variance weighted	2	0.039079883602502	0.0322476898892983	0.225563623764216	0.986512358813692	Not significant
AFM	Inverse variance weighted	2	-0.0421254	0.0254584556693012	0.0979911503206307	0.909017330508798	Not significant
GSN	Inverse variance weighted	3	-0.0162019	0.018666924155772	0.385422695785746	0.986512358813692	Not significant
SELL	Inverse variance weighted	2	0.010254663209913	0.0313275189796939	0.743412838423293	0.986512358813692	Not significant
ANG	Inverse variance weighted	4	-0.00452469	0.0130963514909401	0.729724087300914	0.986512358813692	Not significant
F5	Inverse variance weighted	2	-0.00783406	0.0319575897709749	0.806348556375699	0.986512358813692	Not significant
GSTP1	Inverse variance weighted	3	0.00372471397567421	0.0167248427353082	0.823764743198067	0.986512358813692	Not significant
CCL16	Inverse variance weighted	2	-0.00842906	0.0129166959944835	0.514032943192061	0.986512358813692	Not significant
CDNF	Inverse variance weighted	2	0.0121077935225699	0.0164585688727139	0.461941974995561	0.986512358813692	Not significant
ERAP1	Inverse variance weighted	3	0.00612698082666669	0.0207611945709915	0.767904526887349	0.986512358813692	Not significant
CAPG	Inverse variance weighted	3	-0.00436569	0.0141296113495843	0.757340708641309	0.986512358813692	Not significant
CA1	Inverse variance weighted	2	0.0264620241406662	0.0270919982158063	0.32869449078941	0.986512358813692	Not significant
DPT	Inverse variance weighted	2	-0.0206788	0.0354145857215068	0.559283128188896	0.986512358813692	Not significant
ESD	Inverse variance weighted	2	-0.00597584	0.0178316201738938	0.737529930256672	0.986512358813692	Not significant
GPC5	Inverse variance weighted	2	-0.00219418	0.0110460588797865	0.842544913887719	0.986512358813692	Not significant
HRG	Inverse variance weighted	3	0.0109736732573256	0.0107601754582327	0.307803647448657	0.986512358813692	Not significant
PRSS2	Inverse variance weighted	2	-0.0194517	0.0188267512918432	0.301512083728941	0.986512358813692	Not significant
CD300C	Inverse variance weighted	2	0.026841307499643	0.0259637223791873	0.301229468067605	0.986512358813692	Not significant
CD55	Inverse variance weighted	2	-0.00838114	0.0104827001517534	0.423988274543166	0.986512358813692	Not significant
IL22RA2	Inverse variance weighted	2	-0.0266937	0.0384946972071929	0.488034911621776	0.986512358813692	Not significant
LILRB1	Inverse variance weighted	3	0.0238253872236791	0.013907450386322	0.0866870820391205	0.909017330508798	Not significant
JAG1	Inverse variance weighted	2	0.00835152514163442	0.0528444050224433	0.874425348336045	0.986512358813692	Not significant
KIR2DL4	Inverse variance weighted	3	-0.00524462	0.0113922896528313	0.645253893582323	0.986512358813692	Not significant
MICB	Inverse variance weighted	6	-0.0247018	0.0203600057178341	0.225033585937562	0.986512358813692	Not significant
CD200R1	Inverse variance weighted	2	0.000906597176886751	0.0294669684173218	0.975455711070469	0.996204346564795	Not significant
ICAM5	Inverse variance weighted	2	0.00362748608822928	0.0132838130914783	0.784795052883785	0.986512358813692	Not significant
SCARF1	Inverse variance weighted	2	0.00286785426796671	0.0293645943937665	0.922199359022661	0.986512358813692	Not significant
IL27RA	Inverse variance weighted	2	0.0187991584550645	0.0091683615640795	0.0403216921692985	0.866955990561085	Not significant
HAVCR2	Inverse variance weighted	2	-0.0570817	0.0420138297653403	0.174260570939319	0.96526688804623	Not significant
UNC5C	Inverse variance weighted	2	0.00445791701027868	0.0375178938937137	0.905417100423123	0.986512358813692	Not significant
PPID	Inverse variance weighted	2	-0.0013757	0.0115451852933428	0.905150016748459	0.986512358813692	Not significant
VAV1	Inverse variance weighted	2	-0.0214734	0.0318475778948215	0.500148736257497	0.986512358813692	Not significant
F2	Inverse variance weighted	2	0.0173515102579636	0.0547485023275921	0.751295783482728	0.986512358813692	Not significant
IL1RN	Inverse variance weighted	2	-0.0204759	0.0215107879219809	0.341152753008704	0.986512358813692	Not significant
SEMA3E	Inverse variance weighted	3	0.0180842841656281	0.0261825237591436	0.489753729129974	0.986512358813692	Not significant
FAS	Inverse variance weighted	2	0.007702415670634	0.0308482850518962	0.802829414325524	0.986512358813692	Not significant
LEPR	Inverse variance weighted	3	-0.00257469	0.00969306058788196	0.790530337611603	0.986512358813692	Not significant
SIRPA	Inverse variance weighted	3	-0.010476	0.00716594583859208	0.143763449738433	0.909017330508798	Not significant
ALCAM	Inverse variance weighted	2	0.0145204203515977	0.0509211872238964	0.775525556802043	0.986512358813692	Not significant
CNDP1	Inverse variance weighted	2	-0.0848518	0.0403266777253708	0.0353686732183951	0.866955990561085	Not significant
RGMA	Inverse variance weighted	2	0.0465940932687762	0.0536517144805963	0.385145362454691	0.986512358813692	Not significant
SLAMF7	Inverse variance weighted	2	0.0135505015333632	0.0133736717361935	0.310954023395061	0.986512358813692	Not significant
EGF	Inverse variance weighted	2	0.00192905093819968	0.0205041644404247	0.92504486578612	0.986512358813692	Not significant
FGFR1	Inverse variance weighted	2	0.0418506349402003	0.0358180707742737	0.242636438203811	0.986512358813692	Not significant
NRP1	Inverse variance weighted	2	0.0126867332426039	0.0189548562601653	0.503295784158426	0.986512358813692	Not significant
FGL1	Inverse variance weighted	2	0.0201822618465948	0.0444640396704452	0.649900249291698	0.986512358813692	Not significant
PDIA5	Inverse variance weighted	3	-0.0270692	0.0271150229539422	0.318128337102051	0.986512358813692	Not significant
FAM3B	Inverse variance weighted	2	0.000350663553116249	0.0269671342345264	0.989625106322872	0.996681256813588	Not significant
PAM	Inverse variance weighted	2	0.0316584630709339	0.0393198014749707	0.420731292542462	0.986512358813692	Not significant
THSD1	Inverse variance weighted	3	-0.00465119	0.0191859122964919	0.808448846866171	0.986512358813692	Not significant
CD300A	Inverse variance weighted	4	-7.57279e-05	0.010281565066829	0.994123309232461	0.99704596339928	Not significant
CRTAC1	Inverse variance weighted	2	0.0100163996992256	0.0259625770713073	0.699643726495056	0.986512358813692	Not significant
MFAP4	Inverse variance weighted	2	0.00462691187858246	0.0296819199947251	0.876125108918105	0.986512358813692	Not significant
RNASE4	Inverse variance weighted	2	0.00659702316603098	0.0138570172895522	0.634018702323801	0.986512358813692	Not significant
PSG7	Inverse variance weighted	2	-0.0262998	0.0469627891071017	0.575469922365939	0.986512358813692	Not significant
F13B	Inverse variance weighted	2	0.0176029525520651	0.0131999491194254	0.182347393815516	0.971946014205344	Not significant
ASIP	Inverse variance weighted	2	0.00554176384683377	0.0242466692536014	0.819212676279284	0.986512358813692	Not significant
CBLN4	Inverse variance weighted	2	-0.0120583	0.026561850088786	0.649849250667242	0.986512358813692	Not significant
TNXB	Inverse variance weighted	3	0.0190523301220054	0.0379154453837239	0.615319212955475	0.986512358813692	Not significant
CLEC3B	Inverse variance weighted	2	0.0608487216731109	0.037698860470389	0.106511542097788	0.909017330508798	Not significant
OLFM1	Inverse variance weighted	2	0.0701691359053999	0.0441479128590554	0.111967849562423	0.909017330508798	Not significant
SPINK6	Inverse variance weighted	2	0.0377418258798035	0.0459428371733097	0.411364186842366	0.986512358813692	Not significant
SEMA4D	Inverse variance weighted	3	-0.0180129	0.0159281542953846	0.258102739488703	0.986512358813692	Not significant
ROBO1	Inverse variance weighted	2	-0.0220489	0.0236383720797947	0.350944191539514	0.986512358813692	Not significant
ACP6	Inverse variance weighted	2	0.0321405823933437	0.0768931223567776	0.675954179690575	0.986512358813692	Not significant
CLPS	Inverse variance weighted	2	0.0110724268476656	0.0468755807493979	0.813270615384181	0.986512358813692	Not significant
TDGF1	Inverse variance weighted	5	0.00141860732404456	0.0130409753210325	0.9133763773973	0.986512358813692	Not significant
S100A12	Inverse variance weighted	2	0.0375273035560714	0.0277610829119098	0.176440783288127	0.967854782114481	Not significant
CRHBP	Inverse variance weighted	2	-0.0378872	0.0533684645296702	0.477754864961386	0.986512358813692	Not significant
PCOLCE2	Inverse variance weighted	3	0.0120857399509882	0.0143057520852584	0.398213123278151	0.986512358813692	Not significant
CHRDL2	Inverse variance weighted	2	0.0164089529168068	0.0215317190291061	0.44601058244583	0.986512358813692	Not significant
VIT	Inverse variance weighted	2	0.000682731937687646	0.0370403228247524	0.985294123082297	0.996375980091287	Not significant
SIRPB1	Inverse variance weighted	3	-0.000338071	0.0167036667547667	0.983852457026203	0.996375980091287	Not significant
CPXM1	Inverse variance weighted	2	0.00218483685847073	0.027240948310449	0.93607489675597	0.986512358813692	Not significant
TAPBPL	Inverse variance weighted	2	-0.029975	0.0407232784855656	0.461690867555645	0.986512358813692	Not significant
VWA1	Inverse variance weighted	2	-0.0595887	0.0226432649128579	0.00849757701063922	0.647962203213003	Not significant
HSP90B1	Inverse variance weighted	3	0.00181831215534895	0.00759116582152252	0.810694615707919	0.986512358813692	Not significant
CPN2	Inverse variance weighted	2	-0.00405302	0.011208878528204	0.717658499673386	0.986512358813692	Not significant
GKN2	Inverse variance weighted	3	0.0438305968291143	0.0168500143466972	0.00928928208492009	0.647962203213003	Not significant
PCYOX1	Inverse variance weighted	2	0.011439811457774	0.0384970766014778	0.766343958517324	0.986512358813692	Not significant
FAM20A	Inverse variance weighted	2	-0.0306207	0.0218472173030634	0.161038987525231	0.938010597440776	Not significant
PSG3	Inverse variance weighted	2	-0.0224369	0.0467562261509552	0.631320179358664	0.986512358813692	Not significant
ASPN	Inverse variance weighted	2	-0.012033	0.0308474827899499	0.696476680939548	0.986512358813692	Not significant
TIMP4	Inverse variance weighted	2	-0.0228921	0.0916366276905449	0.802731281044577	0.986512358813692	Not significant
CFHR4	Inverse variance weighted	6	0.0205624771097052	0.0114625275009753	0.0728312341356035	0.909017330508798	Not significant
IGLL1	Inverse variance weighted	2	-0.0100636	0.0279774686908128	0.719069891583802	0.986512358813692	Not significant
PROL1	Inverse variance weighted	2	-0.0377701	0.0296894602344242	0.203311718099804	0.986512358813692	Not significant
NELL1	Inverse variance weighted	2	-0.0246584	0.0148354224691678	0.0964873500366783	0.909017330508798	Not significant
SERPINA12	Inverse variance weighted	2	-0.00322126	0.0151678669356026	0.831815257757432	0.986512358813692	Not significant
ENPP5	Inverse variance weighted	4	0.00856980472227905	0.00993599304029324	0.388411839356958	0.986512358813692	Not significant
LRRC15	Inverse variance weighted	2	0.0155358341467025	0.0112002450519378	0.165411973391204	0.952542947991307	Not significant
ART4	Inverse variance weighted	3	-0.0133416	0.00814295049662464	0.101334084706149	0.909017330508798	Not significant
NTN1	Inverse variance weighted	2	0.00792123101994974	0.0125852573587552	0.529083575551375	0.986512358813692	Not significant
LRP11	Inverse variance weighted	3	0.00104426855186376	0.00883677262199383	0.905930527246237	0.986512358813692	Not significant
ALPPL2	Inverse variance weighted	2	0.0104986221520547	0.0288922811265191	0.716327631063656	0.986512358813692	Not significant
GFRAL	Inverse variance weighted	3	-0.0377254	0.0394031373657161	0.338355123782062	0.986512358813692	Not significant
NDST1	Inverse variance weighted	2	-0.0322267	0.0334794182005097	0.335757575905011	0.986512358813692	Not significant
ST8SIA6	Inverse variance weighted	2	0.085554828206787	0.0735836404291129	0.244956043218198	0.986512358813692	Not significant
ST3GAL6	Inverse variance weighted	4	0.0048551838961951	0.0104364715229153	0.641778815475895	0.986512358813692	Not significant
LILRB5	Inverse variance weighted	4	0.0259980842492739	0.0229090746195889	0.256443277645938	0.986512358813692	Not significant
ADAM23	Inverse variance weighted	3	0.00993953594281954	0.0545756015058941	0.855485283656957	0.986512358813692	Not significant
NEGR1	Inverse variance weighted	2	-0.02191	0.167007084067135	0.895623266202766	0.986512358813692	Not significant
MATN4	Inverse variance weighted	2	-0.0209185	0.0211450138690563	0.322521805847746	0.986512358813692	Not significant
VWA2	Inverse variance weighted	2	0.0025644182004033	0.0241348648890991	0.915381081817163	0.986512358813692	Not significant
ITIH3	Inverse variance weighted	2	0.0194551226021048	0.0110190878768866	0.0774657066102593	0.909017330508798	Not significant
FUT10	Inverse variance weighted	6	-0.0236611	0.0279437055275776	0.397139377341255	0.986512358813692	Not significant
TMEM132C	Inverse variance weighted	3	-0.0302466	0.0194517627166098	0.119956633803624	0.909017330508798	Not significant
NFASC	Inverse variance weighted	4	-0.00834334	0.012943740195344	0.519196353637228	0.986512358813692	Not significant
IFNLR1	Inverse variance weighted	2	-0.00829312	0.0205968284446581	0.687212655000245	0.986512358813692	Not significant
COCH	Inverse variance weighted	4	0.00819565234928559	0.0148405031304926	0.580777797709898	0.986512358813692	Not significant
IGFLR1	Inverse variance weighted	3	-0.00344275	0.0158079175156138	0.827595611029418	0.986512358813692	Not significant
SERPINA9	Inverse variance weighted	2	0.0593706882032823	0.0337187524772597	0.0782787434539822	0.909017330508798	Not significant
CRELD1	Inverse variance weighted	4	-0.0281449	0.0122384499373975	0.0214646715105566	0.866955990561085	Not significant
KNG1	Inverse variance weighted	2	-0.0167715	0.0307207591732487	0.585111607583132	0.986512358813692	Not significant
ALPP	Inverse variance weighted	2	0.00809525791499257	0.0238327605194864	0.73410555730235	0.986512358813692	Not significant
QPCT	Inverse variance weighted	3	0.00934997767457823	0.0126192140163006	0.45873475848345	0.986512358813692	Not significant
FAM151A	Inverse variance weighted	2	0.0275396137192178	0.0543142697599302	0.612125378490043	0.986512358813692	Not significant
TMEM132A	Inverse variance weighted	2	-0.00552378	0.0100930898058819	0.584183923880787	0.986512358813692	Not significant
HP	Inverse variance weighted	3	0.0126368469490524	0.0165211902517446	0.444338716684587	0.986512358813692	Not significant
AMY1A	Inverse variance weighted	6	0.00967966300645697	0.0153657253475785	0.528726262317403	0.986512358813692	Not significant
TPST1	Inverse variance weighted	2	-0.0522315	0.105972196621002	0.622097627318734	0.986512358813692	Not significant
SEMA6A	Inverse variance weighted	2	0.0225771168242229	0.0254079307031013	0.37422592864657	0.986512358813692	Not significant
GLTPD2	Inverse variance weighted	2	0.0497919869202952	0.0246537077417762	0.0434191740395017	0.866955990561085	Not significant
CRTAM	Inverse variance weighted	2	0.00528051707196164	0.0256679666982727	0.837006501392474	0.986512358813692	Not significant
B3GNT2	Inverse variance weighted	2	-0.062213	0.0296592910749122	0.0359413588446514	0.866955990561085	Not significant
CTSB	Inverse variance weighted	2	0.0110480071925598	0.0318716880529918	0.728861667653439	0.986512358813692	Not significant
MANEA	Inverse variance weighted	4	0.0483148263777033	0.0629908863867978	0.443073808601019	0.986512358813692	Not significant
TPST2	Inverse variance weighted	2	-0.0231758	0.0902260963480206	0.797284004245681	0.986512358813692	Not significant
LIPN	Inverse variance weighted	3	0.00284586434695754	0.0370962064794257	0.93884965237338	0.986512358813692	Not significant
SPON2	Inverse variance weighted	2	-0.040471	0.0510851032408437	0.428228186134725	0.986512358813692	Not significant
EPHB2	Inverse variance weighted	2	-0.0141909	0.019933108837953	0.476509998469254	0.986512358813692	Not significant
GXYLT1	Inverse variance weighted	2	0.00667717778456179	0.0158288322656861	0.673144427301081	0.986512358813692	Not significant
ITIH5	Inverse variance weighted	2	-0.0218068	0.043961644408804	0.619865811202469	0.986512358813692	Not significant
FUT8	Inverse variance weighted	2	0.0606520129740344	0.0542490879833164	0.263554927611507	0.986512358813692	Not significant
ICAM5	Inverse variance weighted	2	0.00321665624776871	0.0134203051599473	0.810573863172166	0.986512358813692	Not significant
SIGLEC14	Inverse variance weighted	3	0.0129623835340737	0.0147030337832796	0.377986203151561	0.986512358813692	Not significant
PEAR1	Inverse variance weighted	2	-0.0155516	0.0958348744649845	0.871089119732377	0.986512358813692	Not significant
APOH	Inverse variance weighted	3	-0.0186561	0.0249573369610998	0.454749403039147	0.986512358813692	Not significant
GPNMB	Inverse variance weighted	2	0.0310565869906943	0.0241942822999854	0.199270284371876	0.986512358813692	Not significant
KDELC2	Inverse variance weighted	2	0.0158141836870262	0.024943520159741	0.526081033888425	0.986512358813692	Not significant
LILRA4	Inverse variance weighted	2	-0.0100207	0.022912419508624	0.661860553933885	0.986512358813692	Not significant
DPEP2	Inverse variance weighted	2	0.0648456783604378	0.0438816171339062	0.139477032921828	0.909017330508798	Not significant
GRAMD1C	Inverse variance weighted	2	-0.0211372	0.0380320817603359	0.578366470766917	0.986512358813692	Not significant
PTPRU	Inverse variance weighted	2	0.0503673221731991	0.029479710112145	0.0875358245685778	0.909017330508798	Not significant
OXT	Inverse variance weighted	2	-0.0304201	0.0202143350098641	0.132355385502677	0.909017330508798	Not significant
NCR1	Inverse variance weighted	2	-0.069008	0.0325852889498955	0.0341950383321358	0.866955990561085	Not significant
TNFRSF1B	Inverse variance weighted	2	0.030903900544794	0.021581594740352	0.152156328263637	0.914556653925054	Not significant
RARRES1	Inverse variance weighted	4	-0.00834889	0.0156440813135867	0.593564957484561	0.986512358813692	Not significant
CTSH	Inverse variance weighted	3	0.000725513019095809	0.0172622212928675	0.966475620501083	0.989277442380806	Not significant
MMP10	Inverse variance weighted	3	-0.0492513	0.0305016065981956	0.106373021700834	0.909017330508798	Not significant
EFEMP1	Inverse variance weighted	2	0.0001557333299213	0.0203171442228155	0.993884179714162	0.99704596339928	Not significant
GPNMB	Inverse variance weighted	2	0.0370238711993021	0.0161008911972097	0.0214770146719465	0.866955990561085	Not significant
PKDCC	Inverse variance weighted	2	-0.0115867	0.01771369698241	0.513040571027449	0.986512358813692	Not significant
A4GALT	Inverse variance weighted	2	0.00340766253243498	0.0191954318619323	0.859096296249393	0.986512358813692	Not significant
EMILIN3	Inverse variance weighted	2	0.00157195649971613	0.0270506285355131	0.953659699371355	0.989277442380806	Not significant
PSAPL1	Inverse variance weighted	2	-0.0291447	0.0168678761051667	0.0840201584891412	0.909017330508798	Not significant
GRAMD1C	Inverse variance weighted	2	-0.0172313	0.0236662622161303	0.466556313569441	0.986512358813692	Not significant
CLN5	Inverse variance weighted	2	-0.00556649	0.073797524806375	0.939873225073193	0.986512358813692	Not significant
TMEM132B	Inverse variance weighted	2	0.00965937371234354	0.0551149159656592	0.860876288087955	0.986512358813692	Not significant
GALNT16	Inverse variance weighted	2	0.0471223085809156	0.0393700711607532	0.231342856778661	0.986512358813692	Not significant
CHL1	Inverse variance weighted	3	-0.00840924	0.0212642800060498	0.692501085361315	0.986512358813692	Not significant
ERAP2	Inverse variance weighted	4	-0.0068279	0.0134278514017744	0.611111101571826	0.986512358813692	Not significant
CD14	Inverse variance weighted	2	0.0171822534367326	0.0240593578836495	0.475127672075143	0.986512358813692	Not significant
COL15A1	Inverse variance weighted	2	0.00805800336983799	0.0184149878905655	0.661691836209862	0.986512358813692	Not significant
SCUBE1	Inverse variance weighted	2	0.0488833875922618	0.0781875035296894	0.531835098522338	0.986512358813692	Not significant
SERPINA11	Inverse variance weighted	2	0.0301873189318502	0.0259510215664216	0.244731319426425	0.986512358813692	Not significant
LCT	Inverse variance weighted	3	0.0144842703864622	0.0105140698234012	0.168324241353787	0.952542947991307	Not significant
HAVCR1	Inverse variance weighted	2	0.0285282807792118	0.0417567666200738	0.494479597732838	0.986512358813692	Not significant
PENK	Inverse variance weighted	2	0.00558750598552438	0.0129843023241318	0.666957222384114	0.986512358813692	Not significant
MAN1A2	Inverse variance weighted	3	-0.0133682	0.0193105936986638	0.488764582414918	0.986512358813692	Not significant
PGM1	Inverse variance weighted	2	0.0124202119033927	0.0256099281655143	0.627693054804228	0.986512358813692	Not significant
FAM3B	Inverse variance weighted	3	0.00719562083148092	0.0164714683703717	0.66221749871775	0.986512358813692	Not significant
IFNAR1	Inverse variance weighted	3	0.00754677325221213	0.0125136947139694	0.546454713477985	0.986512358813692	Not significant
TFF1	Inverse variance weighted	2	-0.0164187	0.0251232951190831	0.513417958704594	0.986512358813692	Not significant
PLXNB2	Inverse variance weighted	2	-0.0242955	0.0222824146610555	0.275562285563753	0.986512358813692	Not significant
IMPAD1	Inverse variance weighted	5	-0.00510868	0.0183787181424929	0.781037440037231	0.986512358813692	Not significant
ABO	Inverse variance weighted	4	0.00801505561072425	0.00829396079915166	0.333857820950377	0.986512358813692	Not significant
NPTX1	Inverse variance weighted	2	0.0101486891974267	0.0241349438070117	0.674121883917296	0.986512358813692	Not significant
TREM1	Inverse variance weighted	3	0.0244983789885099	0.016365691092406	0.134410121255244	0.909017330508798	Not significant
CPA4	Inverse variance weighted	3	-0.0173398	0.0121065790085705	0.152069100695697	0.914556653925054	Not significant
CXCL12	Inverse variance weighted	2	0.0263172872033343	0.0389521463522962	0.499274797648952	0.986512358813692	Not significant
CRISP2	Inverse variance weighted	3	-0.00834981	0.013816416454376	0.545617778178253	0.986512358813692	Not significant
FKBP7	Inverse variance weighted	2	-0.0106545	0.0129300934355407	0.409936258401718	0.986512358813692	Not significant
B3GNT8	Inverse variance weighted	2	-0.0517518	0.0479433992397347	0.280393564541715	0.986512358813692	Not significant
CBLN1	Inverse variance weighted	2	-0.00609247	0.0106313672630856	0.566600636205612	0.986512358813692	Not significant
WFDC1	Inverse variance weighted	2	0.0057762317719515	0.0119191744129719	0.627948217588574	0.986512358813692	Not significant
ITIH2	Inverse variance weighted	2	-0.00909567	0.00900224370481688	0.312313981074808	0.986512358813692	Not significant
PSG9	Inverse variance weighted	2	0.00692670585207926	0.0219154422007432	0.75195311609481	0.986512358813692	Not significant
TAC1	Inverse variance weighted	3	-0.00892947	0.0434291787045901	0.83709569675761	0.986512358813692	Not significant
DLK2	Inverse variance weighted	2	-0.000747133	0.0350473988362296	0.98299216084801	0.996375980091287	Not significant
GGH	Inverse variance weighted	4	0.00589740963858195	0.0127948808782468	0.644856386612468	0.986512358813692	Not significant
GAA	Inverse variance weighted	2	0.00799967629907153	0.0268378440236692	0.765646321659693	0.986512358813692	Not significant
CPQ	Inverse variance weighted	4	-0.0128289	0.02063494910807	0.534133594909656	0.986512358813692	Not significant
TPSAB1	Inverse variance weighted	4	-0.0206053	0.0180394879226161	0.25335719731053	0.986512358813692	Not significant
CPM	Inverse variance weighted	2	-0.0171133	0.0374298724259711	0.647521033134774	0.986512358813692	Not significant
C4BPA	Inverse variance weighted	3	0.00471564808464509	0.01389227125325	0.734275278904393	0.986512358813692	Not significant
NUDT9	Inverse variance weighted	2	-0.0209596	0.0196083314920116	0.285108445044519	0.986512358813692	Not significant
DSG2	Inverse variance weighted	2	0.00348162822476973	0.019059960838087	0.855059213142207	0.986512358813692	Not significant
MANSC4	Inverse variance weighted	2	0.00802350159119042	0.0100962999061271	0.426789642753715	0.986512358813692	Not significant
LAMC2	Inverse variance weighted	2	0.00541588766358937	0.0102617281256705	0.597655233348007	0.986512358813692	Not significant
B4GALT2	Inverse variance weighted	2	-0.00214453	0.0279205275697872	0.938776068857258	0.986512358813692	Not significant
NQO2	Inverse variance weighted	4	-0.00929466	0.0166848907320927	0.577479346836974	0.986512358813692	Not significant
IGDCC4	Inverse variance weighted	3	0.051667261218077	0.0312045105082166	0.097769905977267	0.909017330508798	Not significant
TIRAP	Inverse variance weighted	3	0.00350106912687261	0.0133056993115682	0.792453830251742	0.986512358813692	Not significant
CRKL	Inverse variance weighted	2	-0.0287568	0.0472018637625456	0.54237230424891	0.986512358813692	Not significant
SPOCK3	Inverse variance weighted	2	0.0240607888712334	0.0186739780084398	0.197583738740404	0.986512358813692	Not significant
DUSP28	Inverse variance weighted	2	0.00615945686022301	0.0358009825140886	0.863400464536481	0.986512358813692	Not significant
NPW	Inverse variance weighted	2	0.0336958889222651	0.0656548423013155	0.607791996128588	0.986512358813692	Not significant
